# Supplementary material for: Electrochemical electrophilic bromination/spirocyclization of N-benzyl-acrylamides to brominated 2-azaspiro[4.5]decanes
Source: Royal Society of Chemistry journal article supplement (doi:10.1039/d3gc00728f), 2023-01-01

## *Supporting Information*

### **Electrochemical electrophilic bromination/spirocyclization of *N*-benzyl-acrylamides to brominated 2-azaspiro[4.5]decanes**

Zhongyi Zhang,<sup>a,b</sup> Zhong-Wei Hou,<sup>\*a</sup> Hao Chen,<sup>a</sup> Pinhua Li,<sup>b</sup> and Lei Wang<sup>\*a,b,c</sup>

<sup>a</sup> Advanced Research Institute and College of Pharmaceutical Sciences, Taizhou University, Jiaojiang, Zhejiang 318000, P. R. China

<sup>b</sup> Department of Chemistry, Huaibei Normal University, Huaibei, Anhui 235000, P. R. China

<sup>c</sup> State Key Laboratory of Organometallic Chemistry, Shanghai Institute of Organic Chemistry, Chinese Academy of Sciences, Shanghai 200032, P. R. China

#### *Table of Contents*

|                                                                     |            |
|---------------------------------------------------------------------|------------|
| <b>1. General Considerations.....</b>                               | <b>S2</b>  |
| <b>2. General Procedure for the Electrosynthesis. ....</b>          | <b>S2</b>  |
| <b>3. Mechanistic Studies .....</b>                                 | <b>S3</b>  |
| <b>4. X-Ray Crystallography .....</b>                               | <b>S6</b>  |
| <b>5. Unsuccessful Substrates .....</b>                             | <b>S9</b>  |
| <b>6. Characterization Data for the Electrolysis Products .....</b> | <b>S9</b>  |
| <b>7. Synthetic Applications.....</b>                               | <b>S16</b> |
| <b>8. Synthesis of <i>N</i>-Benzylacrylamides.....</b>              | <b>S25</b> |
| <b>9. NMR Spectra for the Obtained Compounds .....</b>              | <b>S32</b> |

## 1. General Considerations

Unless otherwise noted, chemicals and materials were purchased from commercial suppliers and used without further purification. All  $^1\text{H}$  NMR,  $^{13}\text{C}$  NMR and  $^{19}\text{F}$  NMR spectra were recorded on a 400 MHz Bruker FT-NMR spectrometer. Data were reported as chemical shifts in ppm relative to TMS (0.00 ppm) or DMSO- $d_6$  (2.50 ppm) for  $^1\text{H}$  NMR and  $\text{CDCl}_3$  (77.0 ppm) or DMSO- $d_6$  (40.0 ppm) for  $^{13}\text{C}$  NMR. The abbreviations used for explaining the multiplicities were as follows: s = singlet, d = doublet, t = triplet, q = quartet, m = multiplet. The coupling constants,  $J$ , are reported in Hertz (Hz). High resolution mass spectroscopy data of the product were collected on a Thermofisher Q Exactive Accurate-Mass Q-Orbitrap LC/MS (HESI). X-Ray data were collected on a Bruker SMART APEXII instrument with an  $\mu\text{S}$  Mo microsource ( $\lambda = 0.7107 \text{ \AA}$ ). XINRUI<sup>®</sup> DJS-292B potentiostat made in China was used as a power supply device. Products were purified by flash chromatography on 200–300 mesh silica gels,  $\text{SiO}_2$ .

## 2. General Procedure for the Electrosynthesis

**2.1 General Procedure for the Model Reaction:** A 20 mL three-necked beaker-type cell (Figure S1A) was charged with *N*-benzyl-*N*-(*tert*-butyl)methacrylamide (**1**, 0.20 mmol), 2-bromoethan-1-ol (**2**, 0.60 mmol),  $\text{KPF}_6$  (0.10 mmol). The cell was equipped with a reticulated vitreous carbon (RVC, 100 PPI, 1.2 cm x 0.8 cm x 0.8 cm) anode and a platinum plate (1.0 cm x 1.0 cm x 0.1 mm) cathode. Then MeCN (6.0 mL) and  $\text{H}_2\text{O}$  (1.0 mL) were added (Figure S1B). The electrolysis was carried out at room temperature using a constant current of 10 mA for 2.5 h. The reaction mixture was concentrated under reduced pressure and the residue was chromatographed through silica gel eluting with ethyl acetate/petroleum ether to give the desired product.

**2.2 General Procedure for the Gram-Scale Synthesis of 3:** The gram-scale electrolysis was conducted in a 100 mL three-necked round-bottomed flask with a piece of RVC (1.2 cm x 2.0 cm x 2.0 cm) as the anode, a Pt plate as the cathode (1.5 cm x 1.5 cm x 0.3 mm), and a constant current of 62 mA for 10 h at room temperature (Figure S1C). The reaction mixture consisted **1** (1.16 g, 5.0 mmol) or **4** (1.31 g, 5.0 mmol), 2-bromoethan-1-ol (**2**, 1.87 g, 15 mmol),  $\text{KPF}_6$  (0.46 g, 2.5 mmol), MeCN (72 mL) and  $\text{H}_2\text{O}$  (12 mL). When the reaction was

complete, the reaction mixture was concentrated under reduced pressure and the residue was chromatographed through silica gel eluting with ethyl acetate/petroleum ether to give the desired product **3** (1.21 g, 74% yield or 1.24 g, 76% yield).

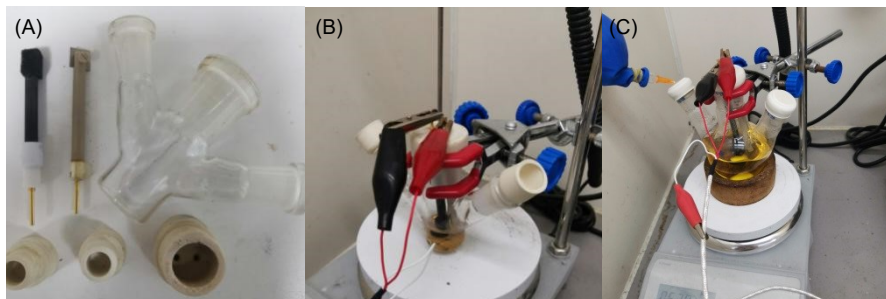

**Figure S1.** The electrolysis setup [The RVC is fixed on a sharpened graphite rod ( $\varnothing$  6 mm)].

### 3. Mechanistic Studies

#### 3.1 Electrophilic Bromination/Spirocyclization of **1** with $\text{Br}_2$

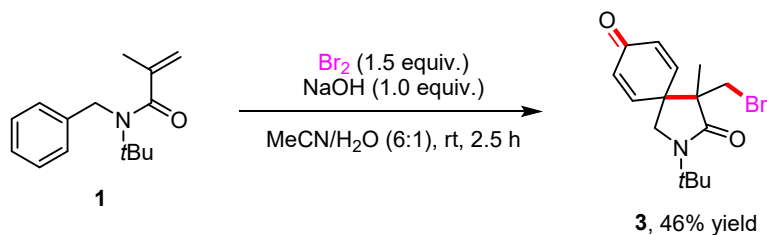

When  $\text{Br}_2$  was added to the solution of *N*-benzyl-*N*-(*tert*-butyl)methacrylamide (**1**) in MeCN/ $\text{H}_2\text{O}$  (6:1) with NaOH (1.5 equiv.), the electrophilic bromination/spirocyclization could be achieved in 46% yield at room temperature for 2.5 h, indicating that the reaction may involve  $\text{Br}_2$  as the intermediate.

#### 3.2 Electrochemical Electrophilic Bromination/Spirocyclization of **1** in MeCN/ $\text{H}_2^{18}\text{O}$

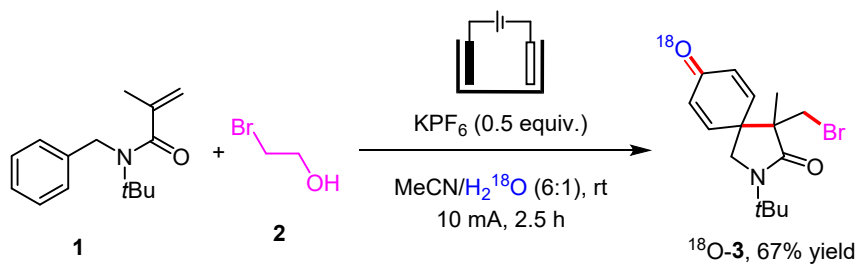

The  $^{18}\text{O}$ -**3** was formed by electrolyzing **1** and **2** with MeCN/ $\text{H}_2^{18}\text{O}$  (6:1) as solvent, indicating that the oxygen atom in product **3** was derived from  $\text{H}_2\text{O}$ .

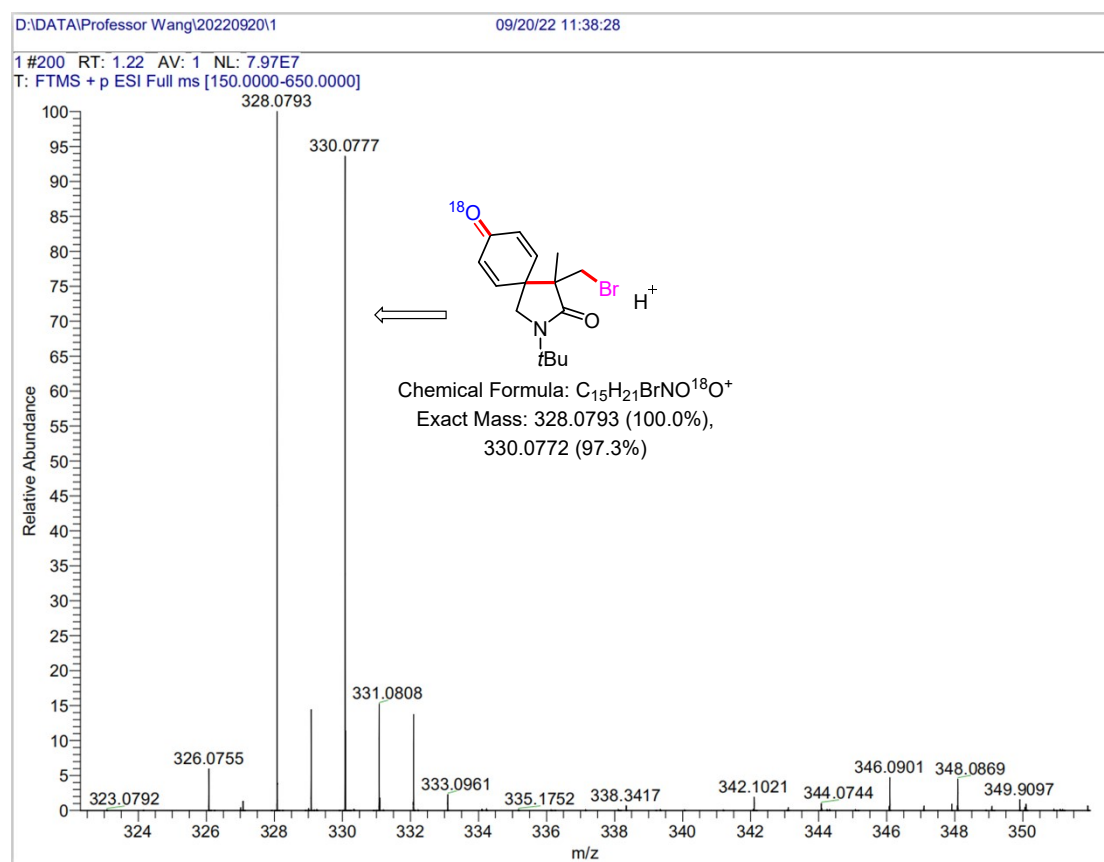

**Figure S2.** High resolution mass spectroscopy (HRMS) of  $^{18}\text{O}$ -**3**.

### 3.3 Electrochemical Oxidation of Benzyl Alcohol **52** to Aldehyde **53**

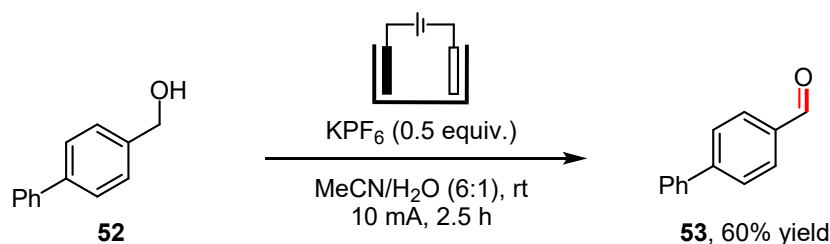

The electrochemical oxidation of benzyl alcohol **52** gave aldehyde **53** in 60% yield, showing that the direct electrooxidation of **56** is feasible to produce product **3** at the anode.

### 3.4 Cyclic Voltammograms Studies

The cyclic voltammograms were recorded in an electrolyte of  $n\text{Bu}_4\text{NBF}_4$  (0.1 M) in MeCN/ $\text{H}_2\text{O}$  (6:1, 5.0 mL) using a glassy carbon disk working electrode (diameter, 3 mm), a

Pt wire auxiliary electrode and an Ag/AgCl reference electrode. The scan rate was 100 mV/s.

The cyclic voltammograms (CVs) of *n*-Bu<sub>4</sub>NBr, *N*-benzyl-*N*-(*tert*-butyl)methacrylamide (**1**) and *N*-(*tert*-butyl)-*N*-(4-methoxybenzyl)methacrylamide (**4**) were recorded in an electrolyte of *n*Bu<sub>4</sub>NBF<sub>4</sub> (0.10 M) in MeCN/H<sub>2</sub>O (6:1, 5.0 mL) (Figure S3–S5). The oxidation potential of Br<sup>-</sup> ( $E_{p/2} = 1.05$  V vs. Ag/AgCl) was significantly lower than that of the substrate **1** ( $E_{p/2} = 1.99$  V vs. Ag/AgCl) and substrate **4** ( $E_{p/2} = 1.72$  V vs. Ag/AgCl), indicating the anodic oxidation of Br<sup>-</sup> were preferentially carried out. The studies of cyclic voltammograms support our proposed mechanism in Scheme 6 of the main text.

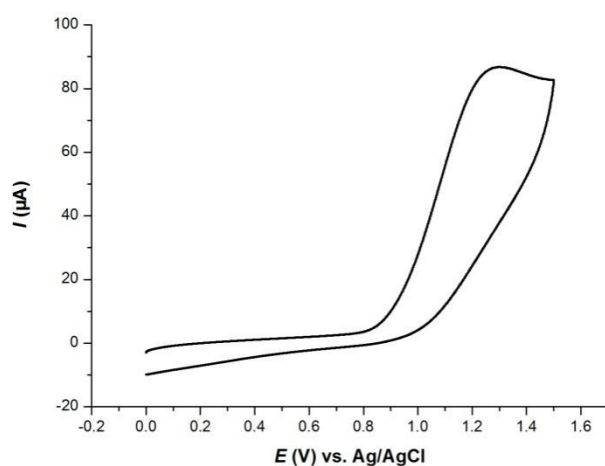

**Figure S3.** Cyclic voltammogram of *n*Bu<sub>4</sub>NBr (10 mM) in an electrolyte of *n*Bu<sub>4</sub>NBF<sub>4</sub> (0.1 M) in MeCN/H<sub>2</sub>O (6:1, 5 mL).  $E_{p/2} = 1.05$  V.

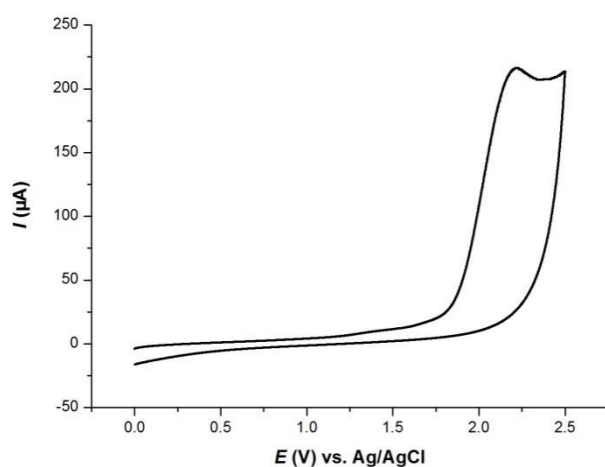

**Figure S4.** Cyclic voltammogram of *N*-benzyl-*N*-(*tert*-butyl)methacrylamide (**1**, 10 mM) in an electrolyte of *n*Bu<sub>4</sub>NBF<sub>4</sub> (0.1 M) in MeCN/H<sub>2</sub>O (6:1, 5 mL).  $E_{p/2} = 1.99$  V.

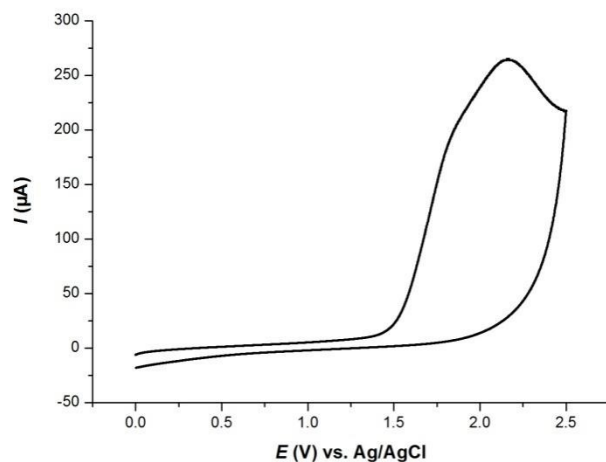

**Figure S5.** Cyclic voltammogram of *N*-(*tert*-butyl)-*N*-(4-methoxybenzyl)methacrylamide (**4**, 10 mM) in an electrolyte of *n*Bu<sub>4</sub>NBF<sub>4</sub> (0.1 M) in MeCN/H<sub>2</sub>O (6:1, 5 mL).  $E_{p/2} = 1.72$  V.

## 4. X-Ray Crystallography

Single crystals suitable for X-ray diffraction were obtained by slow evaporation of a saturated solution of **3** and **45** in petroleum ether/CH<sub>2</sub>Cl<sub>2</sub>) in a loosely capped vial.

### 4.1 X-Ray Single Crystal Diffraction Analysis of Compound **3** (CCDC: 2213723)

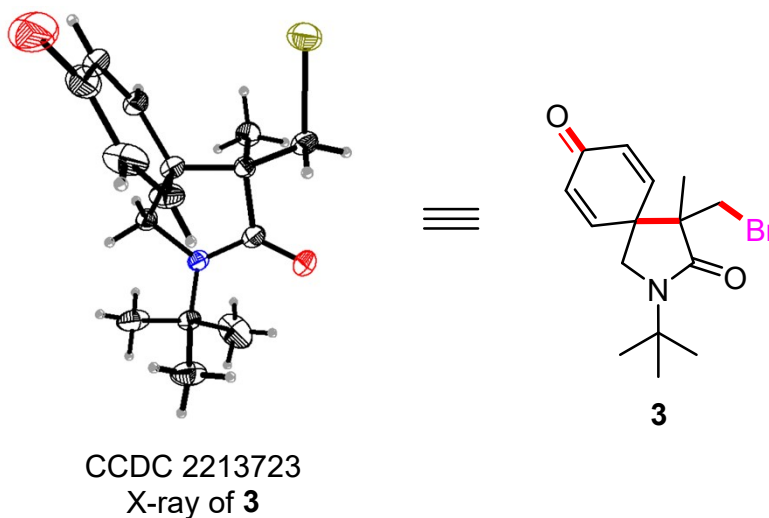

## Datablock: 1

|                        |                 |                    |                  |
|------------------------|-----------------|--------------------|------------------|
| Bond precision:        | C-C = 0.0057 Å  | Wavelength=0.71073 |                  |
| Cell:                  | a=7.079(2)      | b=9.363(3)         | c=11.864(3)      |
|                        | alpha=93.881(5) | beta=97.142(5)     | gamma=100.629(4) |
| Temperature:           | 296 K           |                    |                  |
|                        | Calculated      | Reported           |                  |
| Volume                 | 763.6(4)        | 763.5(4)           |                  |
| Space group            | P -1            | P -1               |                  |
| Hall group             | -P 1            | -P 1               |                  |
| Moiety formula         | C15 H20 Br N O2 | ?                  |                  |
| Sum formula            | C15 H20 Br N O2 | C15 H20 Br N O2    |                  |
| Mr                     | 326.22          | 326.23             |                  |
| Dx, g cm <sup>-3</sup> | 1.419           | 1.419              |                  |
| Z                      | 2               | 2                  |                  |
| Mu (mm <sup>-1</sup> ) | 2.690           | 2.690              |                  |
| F000                   | 336.0           | 336.0              |                  |
| F000'                  | 335.56          |                    |                  |
| h, k, lmax             | 8, 11, 14       | 8, 11, 14          |                  |
| Nref                   | 2705            | 2672               |                  |
| Tmin, Tmax             | 0.502, 0.524    |                    |                  |
| Tmin'                  | 0.492           |                    |                  |

Correction method= Not given

Data completeness= 0.988

Theta (max) = 25.000

R(reflections)= 0.0443( 2034)

wR2(reflections)=  
0.1155( 2672)

S = 0.996

Npar= 176

## 4.2 X-Ray Single Crystal Diffraction Analysis of Compound 45 (CCDC: 2213724)

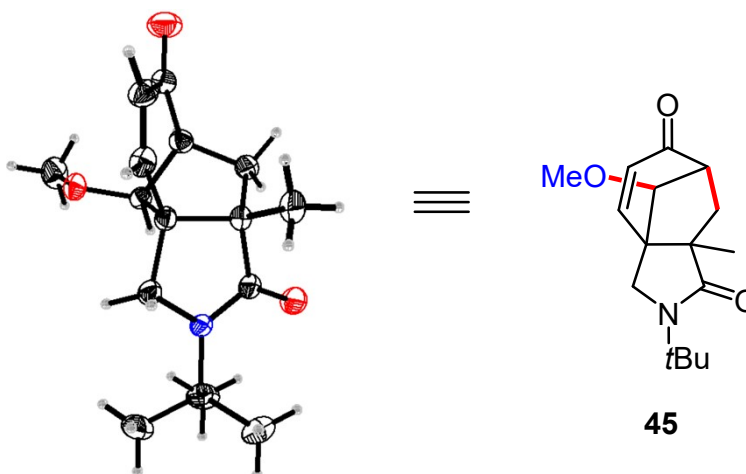

CCDC 2213724  
X-ray of 45

## Datablock: a

---

Bond precision: C-C = 0.0021 Å Wavelength=0.71073  
Cell: a=6.6760 (17) b=23.100 (6) c=9.948 (3)  
alpha=90 beta=94.562 (4) gamma=90  
Temperature: 296 K

|                        | Calculated   | Reported     |
|------------------------|--------------|--------------|
| Volume                 | 1529.3 (7)   | 1529.2 (7)   |
| Space group            | P 21/n       | P2 (1)/n     |
| Hall group             | -P 2yn       | ?            |
| Moiety formula         | C16 H23 N O3 | ?            |
| Sum formula            | C16 H23 N O3 | C16 H23 N O3 |
| Mr                     | 277.35       | 277.35       |
| Dx, g cm <sup>-3</sup> | 1.205        | 1.205        |
| Z                      | 4            | 4            |
| Mu (mm <sup>-1</sup> ) | 0.083        | 0.083        |
| F000                   | 600.0        | 600.0        |
| F000'                  | 600.28       |              |
| h, k, lmax             | 7, 27, 11    | 7, 27, 11    |
| Nref                   | 2686         | 2683         |
| Tmin, Tmax             | 0.971, 0.982 | 0.971, 0.982 |
| Tmin'                  | 0.971        |              |

Correction method= # Reported T Limits: Tmin=0.971 Tmax=0.982  
AbsCorr = MULTI-SCAN

Data completeness= 0.999 Theta (max)= 25.000

R(reflections)= 0.0398 ( 2181) wR2(reflections)=  
0.1081 ( 2683)  
S = 1.019 Npar= 182



## 5. Unsuccessful Substrates

*N*-benzyl-acrylamides

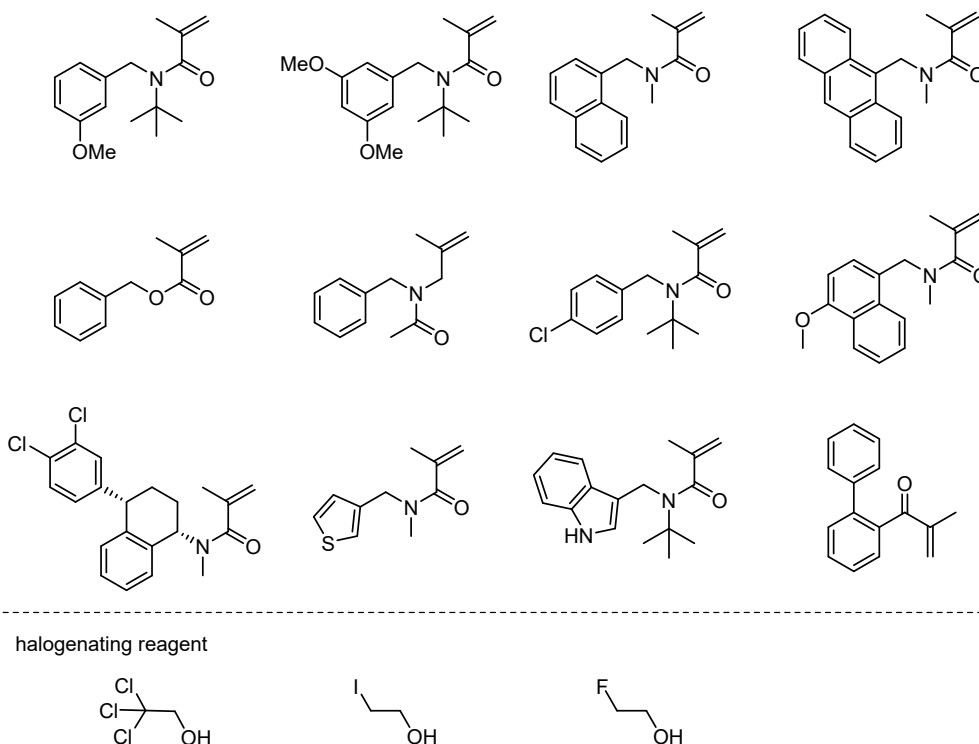

**Figure S6.** Unsuccessful substrates in the reactions.

## 6. Characterization Data for the Electrolysis Products

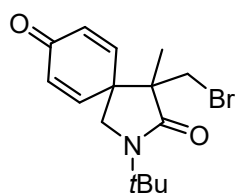

**4-(Bromomethyl)-2-(*tert*-butyl)-4-methyl-2-azaspiro[4.5]deca-6,9-diene-3,8-dione (3).**

White solid (46 mg, 71% yield); m.p. = 103.6–106.2 °C;  $^1\text{H}$  NMR (400 MHz,  $\text{CDCl}_3$ )  $\delta$  7.10 (dd,  $J = 10.0, 2.8$  Hz, 1H), 6.91 (dd,  $J = 10.4, 2.8$  Hz, 1H), 6.46 (dd,  $J = 10.4, 2.0$  Hz, 1H), 6.40 (dd,  $J = 10.0, 2.0$  Hz, 1H), 3.52–3.44 (m, 3H), 3.37 (d,  $J = 10.4$  Hz, 1H), 1.43 (s, 9H), 1.32 (s, 3H);  $^{13}\text{C}$  NMR (101 MHz,  $\text{CDCl}_3$ )  $\delta$  184.9, 173.6, 148.1, 146.7, 131.2, 131.0, 54.9, 52.9, 50.3, 46.6, 37.4, 27.5, 18.5; HRMS (ESI) ( $[\text{M}+\text{H}]^+$ ) Calcd. For  $\text{C}_{15}\text{H}_{21}\text{BrNO}_2^+$ : 326.0750, Found: 326.0753.

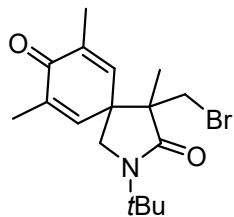

**4-(Bromomethyl)-2-(tert-butyl)-4,7,9-trimethyl-2-azaspiro[4.5]deca-6,9-diene-3,8-dione (15).** White solid (51 mg, 72% yield); m.p. = 102.7–104.9 °C;  $^1\text{H}$  NMR (400 MHz,  $\text{CDCl}_3$ )  $\delta$  6.80 (s, 1H), 6.62 (s, 1H), 3.46 (s, 2H), 3.42 (d,  $J$  = 10.4 Hz, 1H), 3.31 (d,  $J$  = 10.4 Hz, 1H), 1.96 (s, 3H), 1.93 (s, 3H), 1.43 (s, 9H), 1.28 (s, 3H);  $^{13}\text{C}$  NMR (101 MHz,  $\text{CDCl}_3$ )  $\delta$  186.2, 174.2, 142.9, 141.6, 137.1 (2C), 54.7, 52.6, 50.5, 45.9, 37.5, 27.5, 18.5, 16.5; HRMS (ESI) ( $[\text{M}+\text{H}]^+$ ) Calcd. For  $\text{C}_{17}\text{H}_{25}\text{BrNO}_2^+$ : 354.1063, Found: 354.1062.

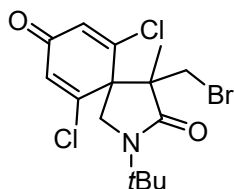

**4-(Bromomethyl)-2-(tert-butyl)-6,10-dichloro-4-methyl-2-azaspiro[4.5]deca-6,9-diene-3,8-dione (16).** White solid (45 mg, 57% yield); m.p. = 134.4–136.4 °C;  $^1\text{H}$  NMR (400 MHz,  $\text{CDCl}_3$ )  $\delta$  6.66 (d,  $J$  = 1.6 Hz, 1H), 6.62 (d,  $J$  = 1.6 Hz, 1H), 4.19 (d,  $J$  = 11.4 Hz, 1H), 3.73–3.69 (m, 2H), 3.63 (d,  $J$  = 11.4 Hz, 1H), 1.61 (s, 3H), 1.47 (s, 9H);  $^{13}\text{C}$  NMR (101 MHz,  $\text{CDCl}_3$ )  $\delta$  181.7, 171.9, 153.8, 153.6, 133.1, 131.2, 55.4, 52.3, 49.5, 38.3, 27.4, 23.5; HRMS (ESI) ( $[\text{M}+\text{H}]^+$ ) Calcd. For  $\text{C}_{15}\text{H}_{19}\text{BrCl}_2\text{NO}_2^+$ : 393.9971, Found: 393.9971.

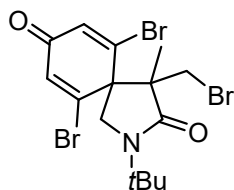

**6,10-Dibromo-4-(bromomethyl)-2-(tert-butyl)-4-methyl-2-azaspiro[4.5]deca-6,9-diene-3,8-dione (17).** White solid (36 mg, 37% yield); m.p. = 138.4–140.9 °C;  $^1\text{H}$  NMR (600 MHz,  $\text{CDCl}_3$ )  $\delta$  6.97 (d,  $J$  = 1.8 Hz, 1H), 6.91 (d,  $J$  = 1.8 Hz, 1H), 4.28 (d,  $J$  = 11.4 Hz, 1H), 3.76 (d,  $J$  = 4.8 Hz, 1H), 3.74 (d,  $J$  = 4.8 Hz, 1H), 3.63 (d,  $J$  = 11.4 Hz, 1H), 1.65 (s, 3H), 1.48 (s, 9H);  $^{13}\text{C}$  NMR (151 MHz,  $\text{CDCl}_3$ )  $\delta$  181.0, 171.8, 145.7, 145.1, 137.7, 135.6, 55.5, 54.9, 52.8, 52.4, 38.6, 27.4, 24.1; HRMS (ESI) ( $[\text{M}+\text{H}]^+$ ) Calcd. For  $\text{C}_{15}\text{H}_{19}\text{BrNO}_2^+$ : 481.8960, Found: 481.8961.

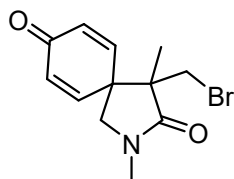

**4-(Bromomethyl)-2,4-dimethyl-2-azaspiro[4.5]deca-6,9-diene-3,8-dione (18).** Colorless oil (11 mg, 19% yield);  $^1\text{H NMR}$  (400 MHz,  $\text{CDCl}_3$ )  $\delta$  7.09 (dd,  $J = 10.4, 3.2$  Hz, 1H), 6.90 (dd,  $J = 10.4, 3.2$  Hz, 1H), 6.46 (dd,  $J = 10.0, 2.0$  Hz, 1H), 6.40 (dd,  $J = 10.0, 2.0$  Hz, 1H), 3.52 (s, 2H), 3.41 (d,  $J = 10.4$  Hz, 1H), 3.33 (d,  $J = 10.4$  Hz, 1H), 2.96 (s, 3H), 1.33 (s, 3H);  $^{13}\text{C NMR}$  (101 MHz,  $\text{CDCl}_3$ )  $\delta$  184.9, 173.8, 147.9, 146.4, 131.4, 130.9, 54.2, 52.3, 47.4, 37.1, 30.1, 18.9; HRMS (ESI) ( $[\text{M}+\text{H}]^+$ ) Calcd. For  $\text{C}_{12}\text{H}_{15}\text{BrNO}_2^+$ : 284.0281, Found: 284.0285.

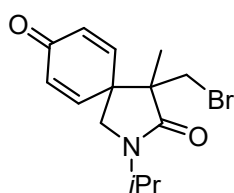

**4-(Bromomethyl)-2-(*iso*-propyl)-4-methyl-2-azaspiro[4.5]deca-6,9-diene-3,8-dione (19).** White solid (9 mg, 14% yield); m.p. = 112.4–114.7 °C;  $^1\text{H NMR}$  (400 MHz,  $\text{CDCl}_3$ )  $\delta$  7.07 (dd,  $J = 10.4, 3.2$  Hz, 1H), 6.90 (dd,  $J = 10.4, 3.2$  Hz, 1H), 6.46 (dd,  $J = 10.4, 2.0$  Hz, 1H), 6.40 (dd,  $J = 10.4, 2.0$  Hz, 1H), 4.50–4.39 (m, 1H), 4.53–4.50 (m, 2H), 3.33 (dd,  $J = 14.8, 10.4$  Hz, 2H), 1.33 (s, 3H), 1.20 (d,  $J = 6.8$  Hz, 3H), 1.17 (d,  $J = 6.8$  Hz, 3H);  $^{13}\text{C NMR}$  (101 MHz,  $\text{CDCl}_3$ )  $\delta$  184.9, 172.7, 148.0, 146.4, 131.4, 130.9, 52.6, 47.2, 47.1, 43.3, 37.1, 19.6, 19.5, 18.7; HRMS (ESI) ( $[\text{M}+\text{H}]^+$ ) Calcd. For  $\text{C}_{14}\text{H}_{19}\text{BrNO}_2^+$ : 312.0594, Found: 312.0595.

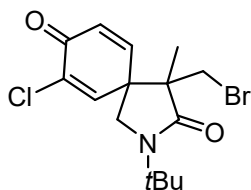

**4-(Bromomethyl)-2-(*tert*-butyl)-7-chloro-4-methyl-2-azaspiro[4.5]deca-6,9-diene-3,8-dione (20).** White solid (67 mg, 93% yield, d:r = 1.3:1); m.p. = 103.8–105.5 °C;  $^1\text{H NMR}$  (400 MHz,  $\text{CDCl}_3$ )  $\delta$  7.27–7.10 (m, 1H), 7.08–6.93 (m, 1H), 6.55–6.47 (m, 1H), 3.56–3.49 (m, 2H), 3.47–3.36 (m, 2H), 1.44–1.43 (m, 9H), 1.36–1.32 (m, 3H);  $^{13}\text{C NMR}$  (101 MHz,  $\text{CDCl}_3$ )  $\delta$  177.9 (2C), 173.2, 173.1, 148.3, 147.0, 143.8, 142.6, 134.9, 134.7, 129.8 (2C), 55.0 (2C), 53.3, 53.1, 49.8 (2C), 49.1, 37.2, 37.1, 27.4, 18.6, 18.4; HRMS (ESI) ( $[\text{M}+\text{H}]^+$ ) Calcd. For  $\text{C}_{15}\text{H}_{20}\text{ClBrNO}_2^+$ : 360.0360, Found: 360.0363.

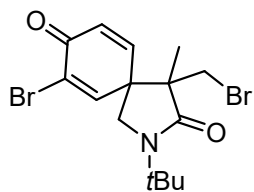

**7-Bromo-4-(bromomethyl)-2-(tert-butyl)-4-methyl-2-azaspiro[4.5]deca-6,9-diene-3,8-dione (21).** White solid (71 mg, 88% yield, d:r = 1.5:1); m.p. = 112.4–114.7 °C;  $^1\text{H}$  NMR (600 MHz,  $\text{CDCl}_3$ )  $\delta$  7.52–7.32 (m, 1H), 7.13–6.91 (m, 1H), 6.55–6.48 (m, 1H), 3.53–3.37 (m, 4H), 1.44–1.43 (m, 9H), 1.36–1.31 (m, 3H);  $^{13}\text{C}$  NMR (151 MHz,  $\text{CDCl}_3$ )  $\delta$  177.8, 173.2 (2C), 148.2, 148.1, 147.0, 146.9, 129.5, 129.4, 127.0, 126.8, 55.2, 55.1, 53.2, 53.1, 50.1, 49.7 (2C), 37.1, 27.5, 18.8, 18.5; HRMS (ESI) ( $[\text{M}+\text{H}]^+$ ) Calcd. For  $\text{C}_{15}\text{H}_{20}\text{Br}_2\text{NO}_2^+$ : 403.9855, Found: 403.9855.

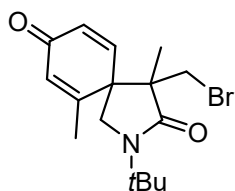

**4-(Bromomethyl)-2-(tert-butyl)-4,7-dimethyl-2-azaspiro[4.5]deca-6,9-diene-3,8-dione (22).** Yellow oil (51 mg, 75% yield, d:r = 1.5:1);  $^1\text{H}$  NMR (400 MHz,  $\text{CDCl}_3$ )  $\delta$  7.07–6.64 (m, 2H), 6.45–6.36 (m, 1H), 3.51–3.31 (m, 4H), 1.97–1.93 (m, 3H), 1.44–1.43 (m, 9H), 1.31–1.28 (m, 3H);  $^{13}\text{C}$  NMR (101 MHz,  $\text{CDCl}_3$ )  $\delta$  185.6, 173.9, 147.9, 146.6, 143.0, 141.8, 137.7, 137.6, 130.7, 130.6, 54.8 (2C), 52.8, 52.6, 50.4, 50.3, 46.6, 46.5, 37.4, 27.5, 18.6, 18.4, 16.2; HRMS (ESI) ( $[\text{M}+\text{H}]^+$ ) Calcd. For  $\text{C}_{16}\text{H}_{23}\text{BrNO}_2^+$ : 340.0907, Found: 340.0912.

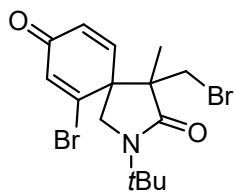

**6-Bromo-4-(bromomethyl)-2-(tert-butyl)-4-methyl-2-azaspiro[4.5]deca-6,9-diene-3,8-dione (23).** **Isomer I:** White solid (39 mg, 48% yield); m.p. = 112.4–114.7 °C;  $^1\text{H}$  NMR (400 MHz,  $\text{CDCl}_3$ )  $\delta$  7.39 (d,  $J$  = 10.0 Hz, 1H), 6.71 (s, 1H), 6.44 (d,  $J$  = 10.0 Hz, 1H), 3.79 (d,  $J$  = 11.2 Hz, 1H), 3.54 (d,  $J$  = 12.0 Hz, 2H), 3.23 (d,  $J$  = 11.2 Hz, 1H), 1.44 (s, 9H), 1.18 (s, 3H);  $^{13}\text{C}$  NMR (101 MHz,  $\text{CDCl}_3$ )  $\delta$  182.8, 172.3, 148.8, 147.5, 134.9, 130.5, 55.7, 54.7, 51.9, 50.6, 38.3, 27.6, 18.9; HRMS (ESI) ( $[\text{M}+\text{H}]^+$ ) Calcd. For  $\text{C}_{15}\text{H}_{20}\text{Br}_2\text{NO}_2^+$ : 403.9855, Found: 403.9855. **Isomer I':** White solid (25 mg, 31% yield); m.p. = 140.5–142.8 °C;  $^1\text{H}$  NMR (400 MHz,  $\text{CDCl}_3$ )  $\delta$  7.00 (d,  $J$  = 10.4 Hz, 1H), 6.88 (s, 1H), 6.43 (d,  $J$  = 10.4, 1H), 3.89 (d,  $J$  = 11.2 Hz, 1H), 3.60–3.56 (m, 2H), 3.51 (d,  $J$  = 11.2 Hz, 1H), 1.50 (s, 3H), 1.45 (s, 9H);  $^{13}\text{C}$  NMR (101 MHz,  $\text{CDCl}_3$ )  $\delta$  182.7, 173.4, 149.2, 145.8, 136.2, 130.2, 55.2, 52.4, 50.9, 50.4,

36.9, 27.3, 21.6; HRMS (ESI) ( $[M+H]^+$ ) Calcd. For  $C_{15}H_{20}Br_2NO_2^+$ : 403.9855, Found: 403.9855.

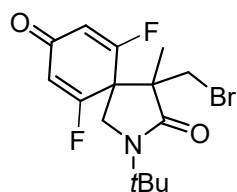

**4-(Bromomethyl)-2-(tert-butyl)-6,10-difluoro-4-methyl-2-azaspiro[4.5]deca-6,9-diene-3,8-dione (24).** White solid (64 mg, 88% yield); m.p. = 128.2–130.1 °C;  $^1H$  NMR (400 MHz,  $CDCl_3$ )  $\delta$  6.03 (s, 1H), 5.99 (s, 1H), 3.82 (d,  $J$  = 10.4 Hz, 1H), 3.60 (d,  $J$  = 10.4 Hz, 1H), 3.57–3.48 (m, 2H), 1.44 (d,  $J$  = 6.0 Hz, 3H), 1.37 (s, 9H);  $^{13}C$  NMR (101 MHz,  $CDCl_3$ )  $\delta$  185.5 (t,  $J_{C-F}$  = 18.2 Hz), 172.6 (dd,  $J_{C-F}$  = 284.2, 14.2 Hz), 171.8, 171.3 (dd,  $J_{C-F}$  = 284.2, 14.2 Hz), 112.2 (d,  $J_{C-F}$  = 14.2 Hz), 110.6 (d,  $J_{C-F}$  = 12.5 Hz), 55.3, 52.0 (t,  $J_{C-F}$  = 3.2 Hz), 50.7 (t,  $J_{C-F}$  = 20.9 Hz), 45.9 (d,  $J_{C-F}$  = 2.7 Hz), 37.0 (d,  $J_{C-F}$  = 4.2 Hz), 27.2, 20.7 (d,  $J_{C-F}$  = 8.7 Hz);  $^{19}F$  NMR (377 MHz,  $CDCl_3$ )  $\delta$  -91.1, -98.5; HRMS (ESI) ( $[M+H]^+$ ) Calcd. For  $C_{15}H_{19}BrF_2NO_2^+$ : 362.0562, Found: 362.0564.

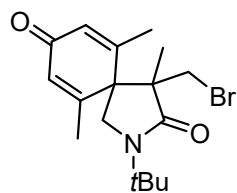

**4-(Bromomethyl)-2-(tert-butyl)-4,6,10-trimethyl-2-azaspiro[4.5]deca-6,9-diene-3,8-dione (25).** White solid (22 mg, 31% yield); m.p. = 164.4–166.3 °C;  $^1H$  NMR (400 MHz,  $CDCl_3$ )  $\delta$  6.26 (s, 1H), 6.24 (s, 1H), 3.79 (d,  $J$  = 10.8 Hz, 1H), 3.53 (t,  $J$  = 11.2 Hz, 2H), 3.32 (d,  $J$  = 11.2 Hz, 1H), 2.18 (s, 3H), 2.14 (s, 3H), 1.47 (s, 9H), 1.35 (s, 3H);  $^{13}C$  NMR (101 MHz,  $CDCl_3$ )  $\delta$  185.5, 173.8, 157.6, 157.3, 132.5, 131.0, 55.1, 52.0, 51.9, 47.5, 38.3, 27.5, 24.0, 23.4, 22.5; HRMS (ESI) ( $[M+H]^+$ ) Calcd. For  $C_{17}H_{25}BrNO_2^+$ : 354.1063, Found: 354.1063.

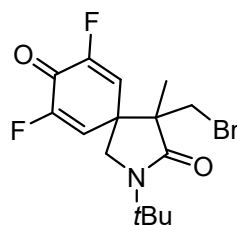

**4-(Bromomethyl)-2-(tert-butyl)-7,9-difluoro-4-methyl-2-azaspiro[4.5]deca-6,9-diene-3,8-dione (26).** White solid (30 mg, 41% yield); m.p. = 120.1–122.7 °C;  $^1H$  NMR (400 MHz,  $CDCl_3$ )  $\delta$  6.72 (dd,  $J$  = 12.0, 2.8 Hz, 1H), 6.53 (dd,  $J$  = 12.0, 2.8 Hz, 1H), 3.56 (dd,  $J$  = 10.4, 2.0 Hz, 1H), 3.51 (d,  $J$  = 11.6 Hz, 1H), 3.46 (d,  $J$  = 11.2 Hz, 1H), 3.41 (d,  $J$  = 10.4 Hz, 1H), 1.43 (s, 9H), 1.36 (s, 3H);  $^{13}C$  NMR (101 MHz,  $CDCl_3$ )  $\delta$  173.0, 171.0 (t,  $J_{C-F}$  = 24.6 Hz),

154.5 (dd,  $J_{C-F} = 265.6, 8.3$  Hz), 154.1 (dd,  $J_{C-F} = 265.6, 8.3$  Hz), 124.6 (d,  $J_{C-F} = 16.9$  Hz), 123.4 (d,  $J_{C-F} = 14.8$  Hz), 55.2, 53.1, 50.4 (t,  $J_{C-F} = 3.0$  Hz), 45.9 (t,  $J_{C-F} = 6.0$  Hz), 37.3, 27.5, 18.6;  $^{19}\text{F}$  NMR (376 MHz,  $\text{CDCl}_3$ )  $\delta$  -125.2 (t,  $J = 13.5$  Hz, 1F), -126.1 (t,  $J = 13.5$  Hz, 1F); HRMS (ESI) ( $[\text{M}+\text{H}]^+$ ) Calcd. For  $\text{C}_{15}\text{H}_{19}\text{BrNO}_2^+$ : 362.0562, Found: 362.0565.

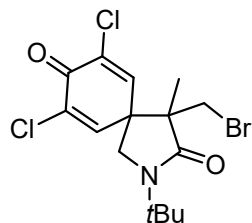

**4-(Bromomethyl)-2-(tert-butyl)-7,9-dichloro-4-methyl-2-azaspiro[4.5]deca-6,9-diene-3,8-dione (27).** White solid (51 mg, 65% yield); m.p. = 217.1–219.6 °C;  $^1\text{H}$  NMR (400 MHz,  $\text{CDCl}_3$ )  $\delta$  7.26 (d,  $J = 2.8$  Hz, 1H), 7.07 (d,  $J = 2.8$  Hz, 1H), 3.55 (d,  $J = 10.8$  Hz, 1H), 3.50 (d,  $J = 11.2$  Hz, 1H), 3.47–3.42 (m, 2H), 1.44 (s, 9H), 1.36 (s, 3H);  $^{13}\text{C}$  NMR (101 MHz,  $\text{CDCl}_3$ )  $\delta$  172.8, 172.3, 144.0, 142.8, 133.9, 133.7, 55.3, 53.6, 49.9, 49.7, 37.0, 27.5, 18.7; HRMS (ESI) ( $[\text{M}+\text{H}]^+$ ) Calcd. For  $\text{C}_{15}\text{H}_{19}\text{BrCl}_2\text{NO}_2^+$ : 393.9971, Found: 393.9972.

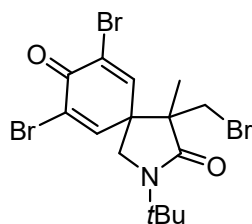

**7,9-Dibromo-4-(bromomethyl)-2-(tert-butyl)-4-methyl-2-azaspiro[4.5]deca-6,9-diene-3,8-dione (28).** White solid (45 mg, 46% yield); m.p. = 250.3–252.9 °C;  $^1\text{H}$  NMR (400 MHz,  $\text{CDCl}_3$ )  $\delta$  7.52 (d,  $J = 2.8$  Hz, 1H), 7.34 (d,  $J = 2.8$  Hz, 1H), 3.55–3.43 (m, 4H), 1.44 (s, 9H), 1.36 (s, 3H);  $^{13}\text{C}$  NMR (101 MHz,  $\text{CDCl}_3$ )  $\delta$  172.8, 171.9, 148.4, 147.2, 124.3, 124.2, 55.3, 53.4, 52.4, 49.1, 36.9, 27.5, 18.7; HRMS (ESI) ( $[\text{M}+\text{H}]^+$ ) Calcd. For  $\text{C}_{15}\text{H}_{19}\text{Br}_3\text{NO}_2^+$ : 481.8960, Found: 481.8961.

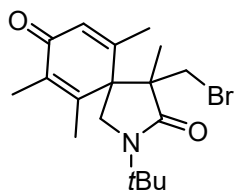

**4-(Bromomethyl)-2-(tert-butyl)-4,6,7,10-tetramethyl-2-azaspiro[4.5]deca-6,9-diene-3,8-dione (29).** White solid (24 mg, 33% yield, d:r = 1.2;1); m.p. = 155.6–157.8 °C;  $^1\text{H}$  NMR (400 MHz,  $\text{CDCl}_3$ )  $\delta$  6.25 (s, 1H), 3.90–3.70 (m, 1H), 3.68–3.39 (m, 2H), 3.30–3.25 (m, 1H), 2.13–2.11 (m, 3H), 2.10–1.93 (m, 3H), 1.90–1.74 (m, 3H), 1.48–1.47 (m, 9H), 1.36–1.25 (m, 3H);  $^{13}\text{C}$  NMR (101 MHz,  $\text{CDCl}_3$ )  $\delta$  185.1, 185.0, 174.2, 173.9, 156.7, 156.5, 150.6, 149.9,

136.9, 135.3, 131.2, 130.3, 55.1, 55.0, 52.6, 51.7, 51.6, 51.5, 48.1, 47.9, 38.8, 38.7, 27.5, 27.4, 23.8, 23.6, 22.9, 22.5, 21.0, 19.0, 11.9, 11.6; HRMS (ESI) ( $[M+H]^+$ ) Calcd. For  $C_{18}H_{27}BrNO_2^+$ : 368.1220, Found: 368.1223.

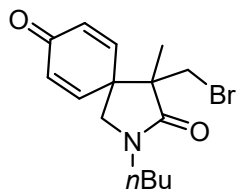

**4-(Bromomethyl)-2-butyl-4-methyl-2-azaspiro[4.5]deca-6,9-diene-3,8-dione (30).**

Colorless oil (20 mg, 31% yield);  $^1H$  NMR (400 MHz,  $CDCl_3$ )  $\delta$  7.01 (dd,  $J = 10.4, 3.2$  Hz, 1H), 6.84 (dd,  $J = 10.4, 3.2$  Hz, 1H), 6.39 (dd,  $J = 10.0, 2.0$  Hz, 1H), 6.33 (dd,  $J = 10.0, 2.0$  Hz, 1H), 3.48–3.42 (m, 2H), 3.36–3.22 (m, 4H), 1.50–1.43 (m, 2H), 1.31–1.24 (m, 5H), 0.89 (t,  $J = 7.2$  Hz, 3H).  $^{13}C$  NMR (101 MHz,  $CDCl_3$ )  $\delta$  184.9, 173.5, 147.9, 146.5, 131.3, 131.0, 52.5, 52.1, 47.4, 42.8, 37.1, 29.2, 20.1, 18.8, 13.7; HRMS (ESI) ( $[M+H]^+$ ) Calcd. For  $C_{15}H_{21}BrNO_2^+$ : 326.0750, Found: 326.0754.

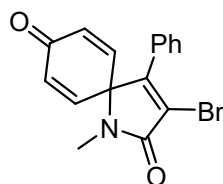

**3-Bromo-1-methyl-4-phenyl-1-azaspiro[4.5]deca-3,6,9-triene-2,8-dione (31).**<sup>1</sup> White solid (60 mg, 91% yield);  $^1H$  NMR (400 MHz,  $CDCl_3$ )  $\delta$  7.44–7.36 (m, 5H), 6.55–6.49 (m, 4H), 2.95 (s, 3H).  $^{13}C$  NMR (101 MHz,  $CDCl_3$ )  $\delta$  183.6, 165.7, 151.2, 144.1, 133.4, 130.2, 130.1, 128.7, 127.7, 119.8, 68.2, 26.6.

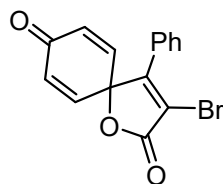

**3-Bromo-4-phenyl-1-oxaspiro[4.5]deca-3,6,9-triene-2,8-dione (32).**<sup>2</sup> White solid (21 mg, 33% yield);  $^1H$  NMR (400 MHz,  $CDCl_3$ )  $\delta$  7.51–7.47 (m, 3H), 7.45–7.40 (m, 2H), 6.71–6.67 (m, 2H), 6.46–6.42 (m, 2H).  $^{13}C$  NMR (101 MHz,  $CDCl_3$ )  $\delta$  183.4, 166.9, 159.7, 141.6, 132.2, 131.3, 129.0, 128.5, 127.4, 112.2, 82.9.

## 7. Synthetic Applications

### 7.1 Conversions of **3** to Compounds **33**, **34** and **36**

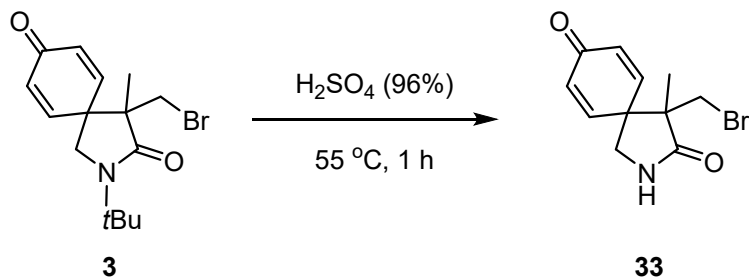

**4-(Bromomethyl)-4-methyl-2-azaspiro[4.5]deca-6,9-diene-3,8-dione (33)**. A mixture of **3** (0.1 mmol, 1.0 equiv.) and H<sub>2</sub>SO<sub>4</sub> 96% (0.50 mL) was heated at 55 °C for 1 h. Then the reaction was cooled to room temperature, diluted with cold water and extracted with CH<sub>2</sub>Cl<sub>2</sub>. The organic phase was concentrated and the residue purified by chromatography (CH<sub>2</sub>Cl<sub>2</sub>/ethyl acetate = 3:1, v/v) to provide product **33** (19 mg, 70% yield) as a white solid. m.p. = 187.8–190.2 °C; <sup>1</sup>H NMR (400 MHz, DMSO-*d*<sub>6</sub>) δ 8.37 (s, 1H), 7.34 (dd, *J* = 10.4, 3.2 Hz, 1H), 7.19 (dd, *J* = 10.4, 3.2 Hz, 1H), 6.37 (s, 1H), 6.35 (s, 1H), 3.71 (d, *J* = 11.2 Hz, 1H), 3.57 (d, *J* = 11.2 Hz, 1H), 3.52 (d, *J* = 10.4 Hz, 1H), 3.17 (dd, *J* = 10.4, 1.6 Hz, 1H), 1.33 (s, 3H); <sup>13</sup>C NMR (101 MHz, DMSO-*d*<sub>6</sub>) δ 185.1, 175.8, 150.2, 149.4, 130.6, 129.9, 51.5, 50.0, 46.4, 39.3, 18.7; HRMS (ESI) ([*M*+*H*]<sup>+</sup>) Calcd. For C<sub>11</sub>H<sub>13</sub>BrNO<sub>2</sub><sup>+</sup>: 270.0124, Found: 270.0125.

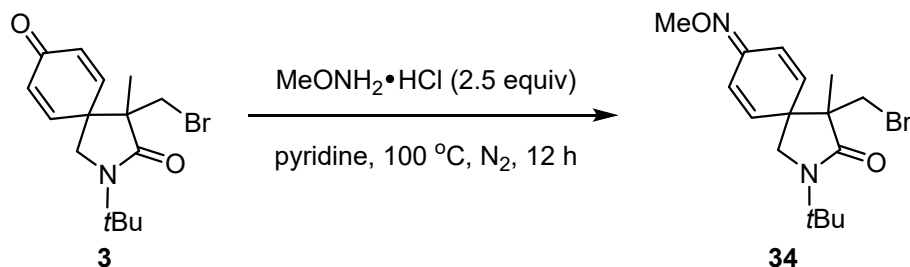

**4-(Bromomethyl)-2-(*tert*-butyl)-8-(methoxyimino)-4-methyl-2-azaspiro[4.5]deca-6,9-dien-3-one (34)**. Pyridine (1.0 mL) was added to a solution of compound **3** (0.1 mmol, 1.0 equiv) and methoxyamine hydrochloride (0.25 mmol, 2.5 equiv) under a N<sub>2</sub> atmosphere. Then, the mixture was stirred at 100 °C for 12 h. After completion of the reaction, pyridine was removed under reduced pressure and the crude reaction mixture was purified by silica gel column chromatography (petroleum ether/ethyl acetate = 10:1, v/v) to provide ketoxime **34** (30 mg, 84% yield) as a white solid. m.p. = 97.3–100.0 °C; <sup>1</sup>H NMR (400 MHz, CDCl<sub>3</sub>) δ 7.04–6.91 (m, 1H), 6.45–6.22 (m, 2H), 6.20–6.04 (m, 1H), 3.94 (s, 3H), 3.66–3.27 (m, 4H), 1.41 (s, 9H), 1.23–1.15 (m, 3H); <sup>13</sup>C NMR (101 MHz, CDCl<sub>3</sub>) δ 174.4, 174.3, 147.7, 138.6, 138.2, 137.0, 134.3, 133.9, 132.8, 132.7, 125.8, 125.6, 125.2, 124.5, 118.2, 118.1, 117.6, 116.9, 62.1, 54.6 (2C), 53.7, 53.0, 52.9, 52.8, 52.7, 52.6, 52.5, 49.0, 46.4 (2C), 37.5 (2C), 27.6, 18.3, 18.2, 17.3, 17.2; HRMS (ESI) ([*M*+*H*]<sup>+</sup>) Calcd. For C<sub>12</sub>H<sub>16</sub>BrN<sub>2</sub>O<sub>2</sub><sup>+</sup>: 299.0390, Found: 299.0392.



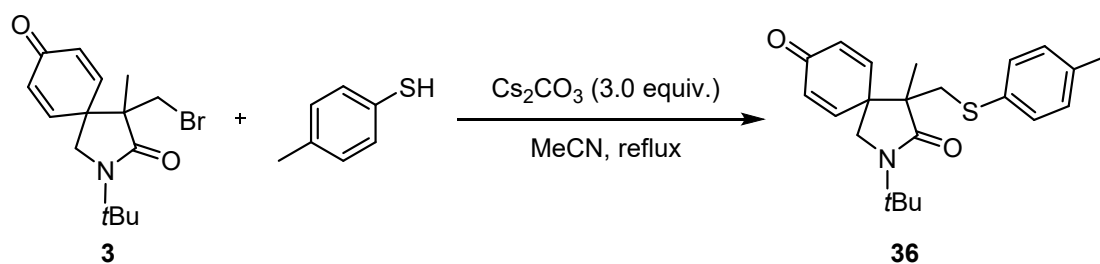

**2-(*tert*-Butyl)-4-methyl-4-((*p*-tolylthio)methyl)-2-azaspiro[4.5]deca-6,9-diene-3,8-dione (36).** To a solution of **3** (0.1 mmol, 1.0 equiv) in MeCN (1.5 mL), 4-methylthiophenol (0.3 mmol, 3.0 equiv.) and  $\text{Cs}_2\text{CO}_3$  (0.3 mmol, 3.0 equiv.) was added. The mixture is heated to reflux and stirred overnight. The crude reaction mixture was concentrated and purified by column chromatography on silica gel (petroleum ether / ethyl acetate = 4/1, v/v) to afford the product **36** (34 mg, 92% yield) as colorless oil.  $^1\text{H}$  NMR (400 MHz,  $\text{CDCl}_3$ )  $\delta$  7.19–7.17 (m, 2H), 7.07–7.04 (m, 3H), 6.92 (dd,  $J = 10.0, 3.2$  Hz, 1H), 6.42–6.36 (m, 2H), 3.44 (d,  $J = 10.4$  Hz, 1H), 3.36 (d,  $J = 10.4$  Hz, 1H), 3.22 (d,  $J = 12.8$  Hz, 1H), 3.03 (d,  $J = 12.8$  Hz, 1H), 2.29 (s, 3H), 1.43 (s, 9H), 1.28 (s, 3H).  $^{13}\text{C}$  NMR (101 MHz,  $\text{CDCl}_3$ )  $\delta$  185.0, 175.2, 148.3, 147.8, 136.5, 133.0, 131.0, 130.9, 130.1, 129.7, 54.7, 54.1, 50.2, 47.0, 41.6, 27.6, 21.0, 18.3; HRMS (ESI) ( $[\text{M}+\text{H}]^+$ ) Calcd. For  $\text{C}_{22}\text{H}_{28}\text{NO}_2\text{S}^+$ : 370.1835, Found: 370.1840.

## 7.2 Tandem Cyclizations of **3** to Compounds **37–51**

### Synthesis of **37–44** and **48–50**

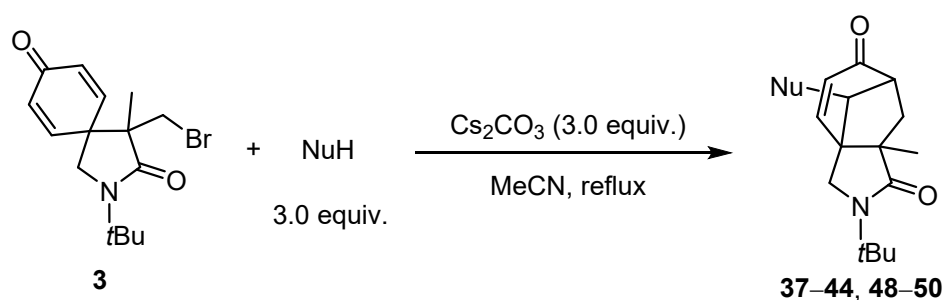

To a solution of **3** (0.1 mmol, 1.0 equiv.) in MeCN (1.5 mL), Nucleophile (0.3 mmol, 3.0 equiv.) and  $\text{Cs}_2\text{CO}_3$  (0.3 mmol, 3.0 equiv.) was added. The mixture is heated to reflux and stirred overnight. The crude reaction mixture was concentrated and purified by column chromatography on silica gel to afford the products **37–44** and **48–50**.

### Synthesis of 45

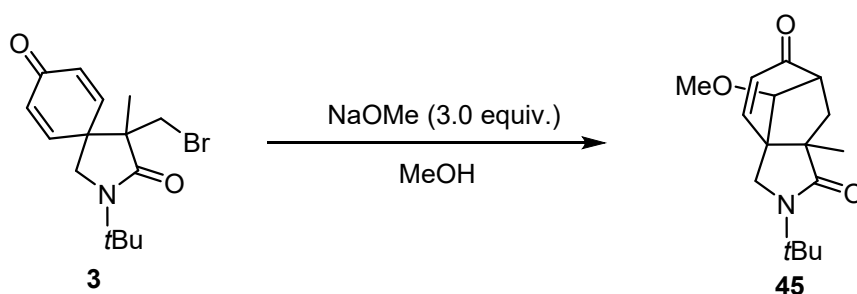

To a solution of **3** (0.1 mmol, 1.0 equiv.) in MeOH (1.5 mL), NaOMe (0.3 mmol, 3.0 equiv.) was added. The mixture is heated to reflux and stirred 16 h. The crude reaction mixture was concentrated and purified by column chromatography on silica gel to afford the product **45**.

### Synthesis of 46, 47 and 51

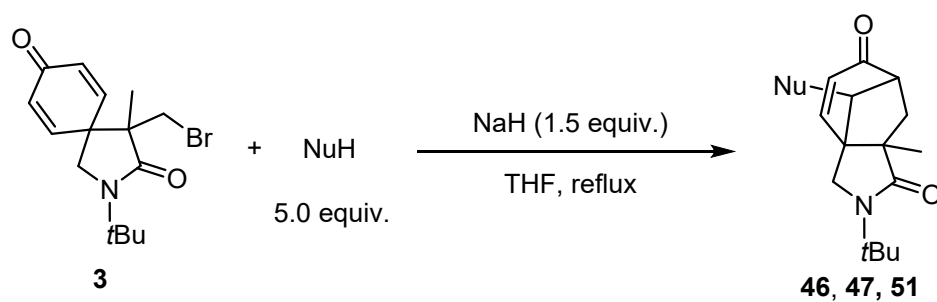

To a solution of **3** (0.1 mmol, 1.0 equiv.) in dry THF (1.5 mL), the mixture was added NaH (60% in mineral oil, 0.15 mmol, 1.5 equiv.) at 0 °C and stirred 10 minutes. Then, the corresponding alcohol (0.5 mmol, 5.0 equiv.) was added. The mixture is heated to reflux and stirred 16 h. The reaction was quenched with a saturated aqueous solution of NH<sub>4</sub>Cl (10 mL) and the aqueous phase was extracted with EtOAc (3 x 5 mL). The combined organic phase was washed with brine (10 mL). The combined organic layers were dried (Na<sub>2</sub>SO<sub>4</sub>), filtered and the filtrate was concentrated under reduced pressure to afford the crude mixture. The crude was purified over silica gel column chromatography to afford **46**, **47** and **51**, respectively.

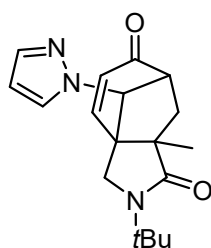

**2-(tert-Butyl)-8a-methyl-9-(1H-pyrazol-1-yl)-2,3,8,8a-tetrahydro-1H-3a,7-methanocyclohepta[c]pyrrole-1,6(7H)-dione (37)**. White solid (29 mg, 93% yield); m.p. = 141.3–143.9 °C; <sup>1</sup>H NMR (400 MHz, CDCl<sub>3</sub>) δ 7.46 (d, *J* = 2.0 Hz, 1H), 7.30 (d, *J* = 2.0 Hz,

1H), 6.74 (dd,  $J = 9.6, 2.0$  Hz, 1H), 6.21 (t,  $J = 2.0$  Hz, 1H), 6.13 (dd,  $J = 9.6, 1.6$  Hz, 1H), 4.68 (d,  $J = 10.8$  Hz, 1H), 4.59–4.57 (m, 1H), 3.60 (d,  $J = 10.8$  Hz, 1H), 3.40 (t,  $J = 6.0$  Hz, 1H), 2.85 (dd,  $J = 14.4, 7.2$  Hz, 1H), 1.48 (s, 9H), 1.42 (d,  $J = 15.2$  Hz, 1H), 1.14 (s, 3H);  $^{13}\text{C}$  NMR (101 MHz,  $\text{CDCl}_3$ )  $\delta$  198.3, 177.3, 148.6, 139.5, 130.7, 129.8, 105.7, 68.0, 57.7, 54.3, 53.6, 53.5, 48.4, 33.5, 27.7, 20.0; HRMS (ESI) ( $[\text{M}+\text{H}]^+$ ) Calcd. For  $\text{C}_{18}\text{H}_{24}\text{N}_3\text{O}_2^+$ : 314.1863, Found: 314.1860.

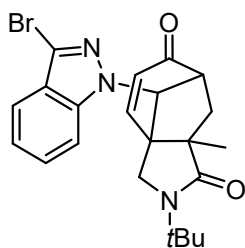

**9-(3-Bromo-1H-indazol-1-yl)-2-(tert-butyl)-8a-methyl-2,3,8,8a-tetrahydro-1H-3a,7-methanocyclohepta[c]pyrrole-1,6(7H)-dione (38).** White solid (41 mg, 93% yield); m.p. = 208.6–211.7 °C;  $^1\text{H}$  NMR (400 MHz,  $\text{CDCl}_3$ )  $\delta$  7.61–7.58 (m, 1H), 7.48–7.43 (m, 1H), 7.39–7.36 (m, 1H), 7.26–7.22 (m, 1H), 6.80 (dd,  $J = 9.6, 2.0$  Hz, 1H), 6.28 (dd,  $J = 9.6, 1.6$  Hz, 1H), 4.87 (dd,  $J = 4.0, 1.6$  Hz, 1H), 3.91 (d,  $J = 11.2$  Hz, 1H), 3.60 (d,  $J = 11.2$  Hz, 1H), 3.53–3.50 (m, 1H), 2.90 (dd,  $J = 14.4, 7.2$  Hz, 1H), 1.49–1.46 (m, 10H), 1.15 (s, 3H);  $^{13}\text{C}$  NMR (101 MHz,  $\text{CDCl}_3$ )  $\delta$  197.6, 178.0, 147.2, 141.4, 131.5, 127.9, 124.2, 122.0, 121.1, 120.8, 108.8, 67.0, 57.1, 54.3, 53.5, 52.7, 48.4, 33.6, 27.7, 19.8; HRMS (ESI) ( $[\text{M}+\text{H}]^+$ ) Calcd. For  $\text{C}_{22}\text{H}_{25}\text{BrN}_3\text{O}_2^+$ : 442.1125, Found: 442.1126.

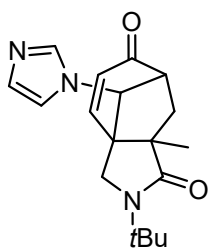

**2-(tert-Butyl)-9-(1H-imidazol-1-yl)-8a-methyl-2,3,8,8a-tetrahydro-1H-3a,7-methanocyclohepta[c]pyrrole-1,6(7H)-dione (39).** White solid (28 mg, 89% yield); m.p. = 172.8–175.2 °C;  $^1\text{H}$  NMR (400 MHz,  $\text{CDCl}_3$ )  $\delta$  7.42 (s, 1H), 7.04 (t,  $J = 1.2$  Hz, 1H), 6.86–6.83 (m, 2H), 6.36 (dd,  $J = 9.6, 1.6$  Hz, 1H), 4.43 (dd,  $J = 4.0, 2.0$  Hz, 1H), 3.72 (d,  $J = 11.2$  Hz, 1H), 3.61 (d,  $J = 11.2$  Hz, 1H), 3.35–3.32 (m, 1H), 2.83 (dd,  $J = 14.4, 7.2$  Hz, 1H), 1.46 (s, 9H), 1.40 (d,  $J = 14.8$  Hz, 1H), 1.15 (s, 3H);  $^{13}\text{C}$  NMR (101 MHz,  $\text{CDCl}_3$ )  $\delta$  197.4, 177.0, 148.1, 137.0, 132.3, 129.6, 119.1, 65.3, 57.8, 54.4, 54.3, 52.1, 47.1, 33.3, 27.6, 19.9; HRMS (ESI) ( $[\text{M}+\text{H}]^+$ ) Calcd. For  $\text{C}_{18}\text{H}_{24}\text{N}_3\text{O}_2^+$ : 314.1863, Found: 314.1859.

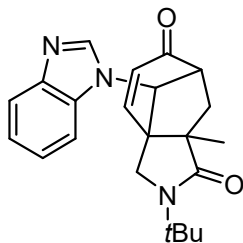

**9-(1*H*-Benzo[*d*]imidazol-1-yl)-2-(*tert*-butyl)-8*a*-methyl-2,3,8,8*a*-tetrahydro-1*H*-3*a*,7-methanocyclohepta[*c*]pyrrole-1,6(7*H*)-dione (40).** White solid (35 mg, 96% yield); m.p. = 309.6–311.9 °C; <sup>1</sup>H NMR (400 MHz, CDCl<sub>3</sub>) δ 7.82–7.80 (m, 2H), 7.37–7.30 (m, 3H), 6.97 (dd, *J* = 10.0, 2.0 Hz, 1H), 6.50 (dd, *J* = 9.6, 1.2 Hz, 1H), 4.82 (dd, *J* = 4.0, 1.6 Hz, 1H), 3.67 (d, *J* = 10.8 Hz, 1H), 3.56 (d, *J* = 10.8 Hz, 1H), 3.48–3.45 (m, 1H), 2.95 (dd, *J* = 14.4, 7.2 Hz, 1H), 1.51–1.46 (m, 10H), 1.18 (s, 3H); <sup>13</sup>C NMR (101 MHz, CDCl<sub>3</sub>) δ 197.4, 177.6, 148.9, 142.9, 141.3, 134.7, 132.5, 123.5, 123.1, 120.8, 109.1, 64.0, 57.7, 54.6, 53.9, 52.3, 47.4, 33.6, 27.6, 20.0; HRMS (ESI) ([*M*+*H*]<sup>+</sup>) Calcd. For C<sub>22</sub>H<sub>26</sub>N<sub>3</sub>O<sub>2</sub><sup>+</sup>: 364.2020, Found: 364.2022.

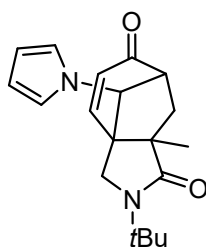

**2-(*tert*-Butyl)-8*a*-methyl-9-(1*H*-pyrrol-1-yl)-2,3,8,8*a*-tetrahydro-1*H*-3*a*,7-methanocyclohepta[*c*]pyrrole-1,6(7*H*)-dione (41).** White solid (22 mg, 70% yield); m.p. = 162.3–164.7 °C; <sup>1</sup>H NMR (400 MHz, CDCl<sub>3</sub>) δ 6.79 (dd, *J* = 10.0, 2.0 Hz, 1H), 6.56 (t, *J* = 2.4 Hz, 2H), 6.34 (dd, *J* = 10.0, 1.2 Hz, 1H), 6.16–6.13 (m, 2H), 4.37 (dd, *J* = 4.0, 2.0 Hz, 1H), 3.82 (d, *J* = 10.8 Hz, 1H), 3.56 (d, *J* = 10.8 Hz, 1H), 3.34–3.31 (m, 1H), 2.80 (dd, *J* = 14.4, 7.2 Hz, 1H), 1.47 (s, 9H), 1.35 (d, *J* = 14.8 Hz, 1H), 1.12 (s, 3H); <sup>13</sup>C NMR (101 MHz, CDCl<sub>3</sub>) δ 198.4, 177.5, 148.3, 132.1, 121.1, 108.9, 67.3, 57.8, 54.5, 54.3, 52.5, 47.5, 33.5, 27.7, 20.0; HRMS (ESI) ([*M*+*H*]<sup>+</sup>) Calcd. For C<sub>19</sub>H<sub>25</sub>N<sub>2</sub>O<sub>2</sub><sup>+</sup>: 313.1911, Found: 313.1908.

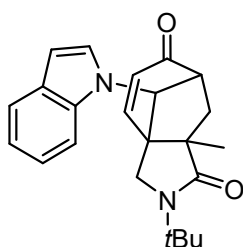

**2-(*tert*-Butyl)-9-(1*H*-indol-1-yl)-8*a*-methyl-2,3,8,8*a*-tetrahydro-1*H*-3*a*,7-methanocyclohepta[*c*]pyrrole-1,6(7*H*)-dione (42).** White solid (30 mg, 83% yield); m.p. =

229.2–231.8 °C; <sup>1</sup>H NMR (400 MHz, CDCl<sub>3</sub>) δ 7.60 (d, *J* = 8.0 Hz, 1H), 7.32 (d, *J* = 8.4 Hz, 1H), 7.24–7.20 (m, 1H), 7.15–7.11 (m, 1H), 6.99 (d, *J* = 3.2 Hz, 1H), 6.88 (dd, *J* = 10.0, 2.0 Hz, 1H), 6.50–6.45 (m, 2H), 4.90 (dd, *J* = 4.0, 2.0 Hz, 1H), 3.66 (d, *J* = 10.8 Hz, 1H), 3.47 (d, *J* = 10.8 Hz, 1H), 3.38–3.35 (m, 1H), 2.92 (dd, *J* = 14.4, 7.2 Hz, 1H), 1.46 (s, 9H), 1.42 (d, *J* = 14.4 Hz, 1H), 1.13 (s, 3H); <sup>13</sup>C NMR (101 MHz, CDCl<sub>3</sub>) δ 198.5, 178.1, 149.5, 137.5, 132.4, 128.0, 126.8, 121.9, 121.2, 120.3, 108.8, 102.7, 64.3, 57.6, 54.5, 54.2, 52.6, 47.6, 33.9, 27.6, 20.0; HRMS (ESI) ([M+H]<sup>+</sup>) Calcd. For C<sub>23</sub>H<sub>27</sub>BrN<sub>2</sub>O<sub>2</sub><sup>+</sup>: 363.2067, Found: 363.2063.

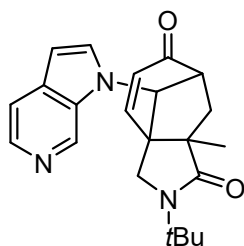

**2-(*tert*-Butyl)-8a-methyl-9-(1*H*-pyrrolo[2,3-*c*]pyridin-1-yl)-2,3,8,8a-tetrahydro-1*H*-3a,7-methanocyclohepta[*c*]pyrrole-1,6(7*H*)-dione (43).** White solid (35 mg, 96% yield); m.p. = 211.7–213.5 °C; <sup>1</sup>H NMR (400 MHz, CDCl<sub>3</sub>) δ 8.68 (s, 1H), 8.21 (d, *J* = 5.6 Hz, 1H), 7.43 (dd, *J* = 5.6, 1.2 Hz, 1H), 7.08 (d, *J* = 3.2 Hz, 1H), 6.83 (dd, *J* = 10.0, 2.0 Hz, 1H), 6.43–6.40 (m, 2H), 4.94 (dd, *J* = 4.0, 1.6 Hz, 1H), 3.59 (d, *J* = 11.2 Hz, 1H), 3.45 (d, *J* = 11.2 Hz, 1H), 3.35–3.31 (m, 1H), 2.88 (dd, *J* = 14.4, 7.2 Hz, 1H), 1.41 (s, 9H), 1.37 (d, *J* = 14.4 Hz, 1H), 1.08 (s, 3H); <sup>13</sup>C NMR (101 MHz, CDCl<sub>3</sub>) δ 198.1, 177.8, 149.2, 139.5, 134.7, 132.9, 132.5, 131.9, 130.2, 115.4, 102.3, 64.4, 57.7, 54.7, 54.3, 52.6, 47.5, 33.7, 27.6, 19.9; HRMS (ESI) ([M+H]<sup>+</sup>) Calcd. For C<sub>22</sub>H<sub>26</sub>N<sub>3</sub>O<sub>2</sub><sup>+</sup>: 364.2020, Found: 364.2017.

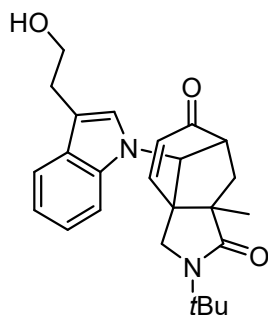

**2-(*tert*-Butyl)-9-(3-(2-hydroxyethyl)-1*H*-indol-1-yl)-8a-methyl-2,3,8,8a-tetrahydro-1*H*-3a,7-methanocyclohepta[*c*]pyrrole-1,6(7*H*)-dione (44).** White solid (26 mg, 64% yield); m.p. = 212.9–214.2 °C; <sup>1</sup>H NMR (400 MHz, CDCl<sub>3</sub>) δ 7.52 (d, *J* = 7.6 Hz, 1H), 7.22 (d, *J* = 8.0 Hz, 1H), 7.18–7.14 (m, 1H), 7.09–7.05 (m, 1H), 6.81 (dd, *J* = 10.0, 1.6 Hz, 1H), 6.79 (s, 1H), 6.40 (dd, *J* = 10.0, 1.6 Hz, 1H), 4.79 (dd, *J* = 4.0, 1.6 Hz, 1H), 3.76 (t, *J* = 6.4 Hz, 2H), 3.58 (d, *J* = 10.8 Hz, 1H), 3.40 (d, *J* = 10.8 Hz, 1H), 3.28–3.25 (m, 1H), 2.88–2.81 (m, 3H), 1.39 (s, 9H), 1.33 (d, *J* = 14.8 Hz, 1H), 1.05 (s, 3H); <sup>13</sup>C NMR (101 MHz, CDCl<sub>3</sub>) δ 198.7, 178.1, 149.6, 138.0, 132.5, 127.6, 125.0, 122.2, 120.0, 119.4, 112.7, 108.9, 64.3, 62.6, 57.6,

54.5, 54.2, 52.5, 47.6, 33.9, 28.6, 27.6, 20.0; HRMS (ESI) ( $[M+H]^+$ ) Calcd. For  $C_{22}H_{25}BrN_3O_2^+$ : 442.1125, Found: 442.1126.

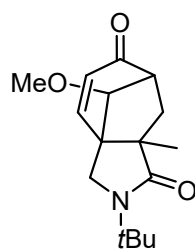

**2-(*tert*-Butyl)-9-methoxy-8a-methyl-2,3,8,8a-tetrahydro-1*H*-3a,7-methanocyclohepta[*c*]pyrrole-1,6(7*H*)-dione (45).** White solid (22 mg, 79% yield); m.p. = 106.4–108.8 °C;  $^1H$  NMR (400 MHz,  $CDCl_3$ )  $\delta$  6.77 (dd,  $J = 10.0, 1.8$  Hz, 1H), 6.25 (dd,  $J = 10.0, 1.8$  Hz, 1H), 3.66 (d,  $J = 10.8$  Hz, 1H), 3.60 (dd,  $J = 4.4, 2.0$  Hz, 1H), 3.49 (d,  $J = 10.4$  Hz, 1H), 3.35 (s, 3H), 3.16–3.12 (m, 1H), 2.58 (dd,  $J = 14.8, 7.2$  Hz, 1H), 1.43 (s, 9H), 1.31 (d,  $J = 14.8$  Hz, 1H), 1.06 (s, 3H);  $^{13}C$  NMR (101 MHz,  $CDCl_3$ )  $\delta$  199.8, 177.9, 148.1, 131.5, 88.4, 58.2, 55.4, 54.0, 51.9, 51.7, 47.3, 32.2, 27.5, 19.8; HRMS (ESI) ( $[M+H]^+$ ) Calcd. For  $C_{16}H_{24}NO_3^+$ : 278.1751, Found: 278.1749.

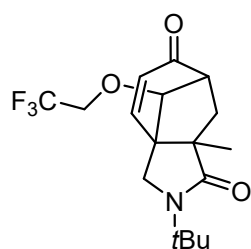

**2-(*tert*-Butyl)-8a-methyl-9-(2,2,2-trifluoroethoxy)-2,3,8,8a-tetrahydro-1*H*-3a,7-methanocyclohepta[*c*]pyrrole-1,6(7*H*)-dione (46).** White solid (16 mg, 46% yield); m.p. = 106.4–108.5 °C;  $^1H$  NMR (400 MHz,  $CDCl_3$ )  $\delta$  6.77 (dd,  $J = 10.0, 1.8$  Hz, 1H), 6.26 (dd,  $J = 10.0, 1.8$  Hz, 1H), 3.98–3.88 (m, 2H), 3.78–3.68 (m, 2H), 3.50 (d,  $J = 10.8$  Hz, 1H), 3.09–3.05 (m, 1H), 2.59 (dd,  $J = 14.8, 6.8$  Hz, 1H), 1.42 (s, 9H), 1.33 (d,  $J = 14.8$  Hz, 1H), 1.06 (s, 3H);  $^{13}C$  NMR (101 MHz,  $CDCl_3$ )  $\delta$  198.8, 177.5, 147.6, 131.5, 123.7 (q,  $J_{C-F} = 279.9$  Hz), 87.8, 67.1 (q,  $J_{C-F} = 34.4$  Hz), 55.2, 54.2, 51.9 (2C), 47.0, 32.1, 27.4, 19.7;  $^{19}F$  NMR (376 MHz,  $CDCl_3$ )  $\delta$  -74.2; HRMS (ESI) ( $[M+H]^+$ ) Calcd. For  $C_{17}H_{23}F_3NO_3^+$ : 346.1625, Found: 346.1622.

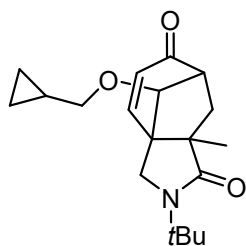

**2-(*tert*-Butyl)-9-(cyclopropylmethoxy)-8a-methyl-2,3,8,8a-tetrahydro-1H-3a,7-methanocyclohepta[c]pyrrole-1,6(7H)-dione (47).** White solid (22 mg, 69% yield); m.p. = 58.2–60.9 °C;  $^1\text{H}$  NMR (400 MHz,  $\text{CDCl}_3$ )  $\delta$  6.63 (dd,  $J = 9.6, 2.0$  Hz, 1H), 6.09 (dd,  $J = 9.6, 1.6$  Hz, 1H), 3.60 (dd,  $J = 4.4, 2.0$  Hz, 1H), 3.53 (d,  $J = 10.4$  Hz, 1H), 3.33 (d,  $J = 10.4$  Hz, 1H), 3.19–3.07 (m, 2H), 2.94–2.91 (m, 1H), 2.41 (dd,  $J = 14.8, 7.2$  Hz, 1H), 1.26 (s, 9H), 1.14 (d,  $J = 14.4$  Hz, 1H), 0.90 (s, 3H), 0.85–0.78 (m, 1H), 0.41–0.31 (m, 2H), 0.04 – –0.04 (m, 2H);  $^{13}\text{C}$  NMR (101 MHz,  $\text{CDCl}_3$ )  $\delta$  200.1, 178.0, 148.3, 131.5, 86.2, 74.9, 55.3, 54.0, 52.3, 52.0, 47.4, 32.3, 27.5, 19.8, 10.5, 3.3, 2.9; HRMS (ESI) ( $[\text{M}+\text{H}]^+$ ) Calcd. For  $\text{C}_{19}\text{H}_{28}\text{NO}_3^+$ : 318.2064, Found: 318.2069.

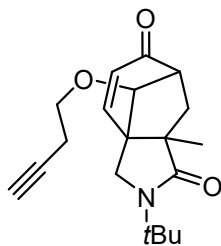

**9-(But-3-yn-1-yloxy)-2-(*tert*-butyl)-8a-methyl-2,3,8,8a-tetrahydro-1H-3a,7-methanocyclohepta[c]pyrrole-1,6(7H)-dione (48).** Colorless oil (26 mg, 82% yield);  $^1\text{H}$  NMR (400 MHz,  $\text{CDCl}_3$ )  $\delta$  6.77 (dd,  $J = 9.6, 2.0$  Hz, 1H), 6.24 (dd,  $J = 9.6, 1.6$  Hz, 1H), 3.75 (dd,  $J = 4.4, 2.0$  Hz, 1H), 3.72 (d,  $J = 10.4$  Hz, 1H), 3.68–3.64 (m, 1H), 3.51–3.45 (m, 2H), 3.10–3.07 (m, 1H), 2.58 (dd,  $J = 14.4, 7.2$  Hz, 1H), 2.41–2.37 (m, 2H), 1.97 (t,  $J = 2.8$  Hz, 1H), 1.43 (s, 9H), 1.30 (d,  $J = 14.8$  Hz, 1H), 1.06 (s, 3H);  $^{13}\text{C}$  NMR (101 MHz,  $\text{CDCl}_3$ )  $\delta$  199.7, 177.9, 148.1, 131.5, 86.8, 80.8, 69.6, 68.2, 55.3, 54.0, 52.2, 51.9, 47.3, 32.3, 27.5, 19.8 (2C); HRMS (ESI) ( $[\text{M}+\text{H}]^+$ ) Calcd. For  $\text{C}_{19}\text{H}_{26}\text{NO}_3^+$ : 316.1907, Found: 316.1914.

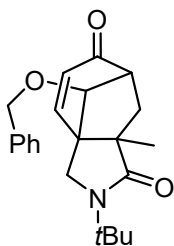

**9-(Benzyloxy)-2-(*tert*-butyl)-8a-methyl-2,3,8,8a-tetrahydro-1*H*-3a,7-methanocyclohepta[*c*]pyrrole-1,6(7*H*)-dione (49).** White solid (30 mg, 85% yield); m.p. = 93.8–95.2 °C; <sup>1</sup>H NMR (400 MHz, CDCl<sub>3</sub>) δ 7.37–7.30 (m, 3H), 7.27–7.25 (m, 2H), 6.79 (dd, *J* = 10.0, 2.0 Hz, 1H), 6.29 (dd, *J* = 10.0, 1.6 Hz, 1H), 4.67 (d, *J* = 12.4 Hz, 1H), 4.33 (d, *J* = 12.4 Hz, 1H), 3.72 (dd, *J* = 4.4, 2.0 Hz, 1H), 3.52 (d, *J* = 10.4 Hz, 1H), 3.41 (d, *J* = 10.4 Hz, 1H), 3.12–3.08 (m, 1H), 2.52 (dd, *J* = 14.4, 7.2 Hz, 1H), 1.29 (d, *J* = 14.8 Hz, 1H), 1.23 (s, 9H), 1.03 (s, 3H); <sup>13</sup>C NMR (101 MHz, CDCl<sub>3</sub>) δ 200.0, 177.8, 148.3, 137.1, 131.5, 128.6, 128.2, 128.1, 84.8, 71.7, 55.3, 53.8, 51.8, 47.2, 32.2, 27.2, 19.8; HRMS (ESI) ([*M*+*H*]<sup>+</sup>) Calcd. For C<sub>22</sub>H<sub>28</sub>NO<sub>3</sub><sup>+</sup>: 354.2064, Found: 354.2068.

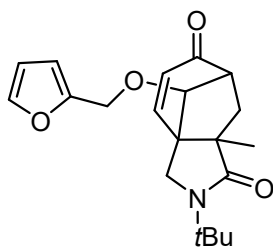

**2-(*tert*-Butyl)-9-(furan-2-ylmethoxy)-8a-methyl-2,3,8,8a-tetrahydro-1*H*-3a,7-methanocyclohepta [*c*]pyrrole-1,6(7*H*)-dione (50).** White solid (22 mg, 64% yield); m.p. = 144.9–147.1 °C; <sup>1</sup>H NMR (400 MHz, CDCl<sub>3</sub>) δ 7.34–7.33 (m, 1H), 6.69 (dd, *J* = 9.6, 2.0 Hz, 1H), 6.27 (dd, *J* = 3.2, 2.0 Hz, 1H), 6.23 (d, *J* = 3.2 Hz, 1H), 6.19 (dd, *J* = 9.6, 1.6 Hz, 1H), 4.49 (d, *J* = 13.6 Hz, 1H), 4.28 (d, *J* = 13.6 Hz, 1H), 3.68 (dd, *J* = 4.4, 2.0 Hz, 1H), 3.43 (d, *J* = 10.4 Hz, 1H), 3.33 (d, *J* = 10.4 Hz, 1H), 2.98–2.94 (m, 1H), 2.48 (dd, *J* = 14.8, 7.2 Hz, 1H), 1.24 (s, 9H), 1.20 (d, *J* = 2.4 Hz, 1H), 0.96 (s, 3H); <sup>13</sup>C NMR (101 MHz, CDCl<sub>3</sub>) δ 199.8, 177.8, 150.7, 148.1, 143.2, 131.5, 110.5, 110.2, 84.8, 63.5, 55.2, 53.9, 51.8 (2C), 47.1, 32.3, 27.3, 19.8; HRMS (ESI) ([*M*+*H*]<sup>+</sup>) Calcd. For C<sub>20</sub>H<sub>26</sub>BrNO<sub>4</sub><sup>+</sup>: 344.1856, Found: 344.1853.

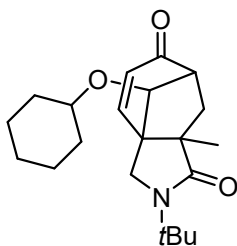

**2-(*tert*-Butyl)-9-(cyclohexyloxy)-8a-methyl-2,3,8,8a-tetrahydro-1*H*-3a,7-methanocyclohepta[*c*]pyrrole-1,6(7*H*)-dione (51).** White solid (24 mg, 69% yield); m.p. = 119.7–122.3 °C; <sup>1</sup>H NMR (400 MHz, CDCl<sub>3</sub>) δ 6.69 (dd, *J* = 10.0, 2.0 Hz, 1H), 6.17 (dd, *J* = 10.0, 1.6 Hz, 1H), 3.72 (dd, *J* = 4.4, 2.0 Hz, 1H), 3.55 (d, *J* = 10.4 Hz, 1H), 3.40 (d, *J* = 10.4 Hz, 1H), 3.20–3.14 (m, 1H), 2.96–2.93 (m, 1H), 2.49 (dd, *J* = 14.8, 7.2 Hz, 1H), 1.64–1.58 (m, 4H), 1.35 (s, 9H), 1.23–1.10 (m, 7H), 0.98 (s, 3H); <sup>13</sup>C NMR (101 MHz, CDCl<sub>3</sub>) δ 200.5,



178.1, 148.3, 131.6, 84.4, 55.2, 54.0, 53.0, 51.9, 47.3, 33.2, 32.3, 31.9, 27.6, 25.5, 24.0, 23.9, 19.8; HRMS (ESI) ( $[M+H]^+$ ) Calcd. For  $C_{21}H_{32}BrNO_3^+$ : 346.2377, Found: 346.2375.

## 8. Synthesis of *N*-Benzylacrylamides

The substrates **1**<sup>3</sup>, **4**<sup>4</sup>, **6**<sup>4</sup> and **12**<sup>3</sup> have been reported.

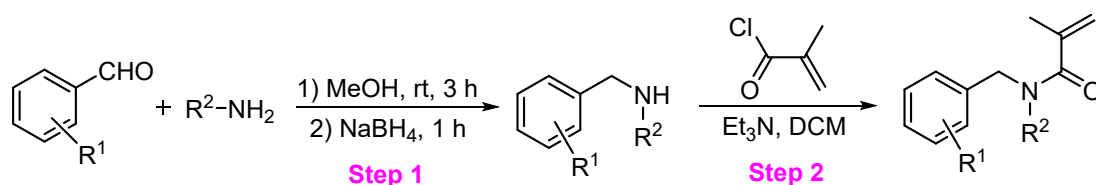

**Step 1:** To a solution of benzaldehyde (10 mmol) in methanol (20 mL) was added alkyl amine (1.0 equiv.), and then the resulting solution was stirred for 3 h at room temperature. Next, the mixture was added NaBH<sub>4</sub> (1.2 equiv.) at 0 °C, and then warmed to room temperature and continue to be stirred 1 h. After related work-up and purification by flash chromatography, the *N*-alkylbenzylamine was thereby obtained, which is used for next synthetic step.

**Step 2:** To a solution of *N*-alkylbenzylamine obtained above and Et<sub>3</sub>N (1.5 equiv) in dry CH<sub>2</sub>Cl<sub>2</sub> (15 mL) was added methacryloyl chloride (1.2 equiv.) at 0 °C. Then the resulting mixture was warmed to r.t. and continue to stir for overnight. After related work-up, the residue was purified by flash chromatography (petroleum ether/ethyl acetate as the eluent) on silica gel to afford the corresponding *N*-benzylacrylamide.

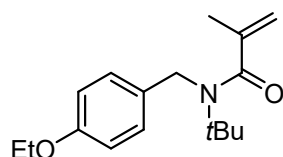

***N*-(*tert*-Butyl)-*N*-(4-ethoxybenzyl)methacrylamide (**5**).** Colorless oil (83% yield); <sup>1</sup>H NMR (400 MHz, CDCl<sub>3</sub>)  $\delta$  7.12 (d,  $J$  = 8.4 Hz, 2H), 6.86 (d,  $J$  = 8.4 Hz, 2H), 5.02–4.93 (m, 2H), 4.61 (s, 2H), 4.05–3.99 (m, 2H), 1.93 (s, 3H), 1.43–1.39 (m, 12H); <sup>13</sup>C NMR (101 MHz, CDCl<sub>3</sub>)  $\delta$  174.6, 157.8, 143.1, 131.8, 127.1, 114.4, 113.3, 63.4, 57.5, 50.1, 28.5, 20.8, 14.8; HRMS (ESI) ( $[M+H]^+$ ) Calcd. For C<sub>17</sub>H<sub>26</sub>NO<sub>2</sub><sup>+</sup>: 276.1958, Found: 276.1961.

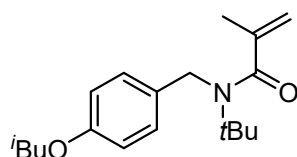

***N*-(*tert*-Butyl)-*N*-(4-*iso*-butoxybenzyl)methacrylamide (**7**).** White solid (61% yield); m.p. = 57.0–59.6 °C; <sup>1</sup>H NMR (400 MHz, CDCl<sub>3</sub>)  $\delta$  7.11 (d,  $J$  = 8.4 Hz, 2H), 6.87 (d,  $J$  = 8.4 Hz,

2H), 5.02–4.93 (m, 2H), 4.61 (s, 2H), 3.70 (d,  $J = 6.8$  Hz, 2H), 2.11–2.04 (m, 1H), 1.94 (s,  $J = 1.4$  Hz, 3H), 1.42 (s, 9H), 1.02 (d,  $J = 6.4$  Hz, 6H);  $^{13}\text{C}$  NMR (101 MHz,  $\text{CDCl}_3$ )  $\delta$  174.5, 158.1, 143.0, 131.6, 127.0, 114.3, 113.2, 74.3, 57.4, 50.1, 28.5, 28.2, 20.8, 19.2; HRMS (ESI) ( $[\text{M}+\text{H}]^+$ ) Calcd. For  $\text{C}_{19}\text{H}_{30}\text{NO}_2^+$ : 304.2271, Found: 304.2273.

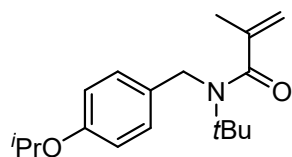

***N*-(*tert*-Butyl)-*N*-(4-*iso*-propoxybenzyl)methacrylamide (8).** Colorless oil (78% yield);  $^1\text{H}$  NMR (400 MHz,  $\text{CDCl}_3$ )  $\delta$  7.11 (d,  $J = 8.4$  Hz, 2H), 6.85 (d,  $J = 8.8$  Hz, 2H), 5.03–4.93 (m, 2H), 4.60 (s, 2H), 4.56–4.50 (m, 1H), 1.93 (s, 3H), 1.42 (s, 9H), 1.33 (d,  $J = 6.0$  Hz, 6H);  $^{13}\text{C}$  NMR (101 MHz,  $\text{CDCl}_3$ )  $\delta$  174.6, 156.7, 143.1, 131.7, 127.2, 115.7, 113.3, 69.8, 57.5, 50.2, 28.5, 22.0, 20.8; HRMS (ESI) ( $[\text{M}+\text{H}]^+$ ) Calcd. For  $\text{C}_{18}\text{H}_{28}\text{NO}_2^+$ : 290.2115, Found: 290.2117.

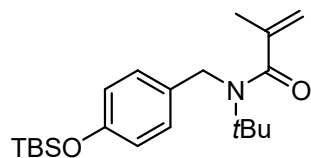

***N*-(*tert*-Butyl)-*N*-(4-((*tert*-butyldimethylsilyl)oxy)benzyl)methacrylamide (9).** White solid (24% yield); m.p. = 65.0–66.3 °C;  $^1\text{H}$  NMR (400 MHz,  $\text{CDCl}_3$ )  $\delta$  6.87 (d,  $J = 8.4$  Hz, 2H), 6.61 (d,  $J = 8.8$  Hz, 2H), 4.83–4.75 (m, 2H), 4.41 (s, 2H), 1.73 (s, 3H), 1.22 (s, 9H), 0.79 (s, 9H), 0.00 (s, 6H);  $^{13}\text{C}$  NMR (101 MHz,  $\text{CDCl}_3$ )  $\delta$  174.6, 154.5, 143.1, 132.6, 127.2, 120.0, 113.4, 57.5, 50.3, 28.6, 25.6, 20.8, 18.1, –4.5; HRMS (ESI) ( $[\text{M}+\text{H}]^+$ ) Calcd. For  $\text{C}_{21}\text{H}_{36}\text{NO}_2\text{Si}^+$ : 362.2510, Found: 362.2511.

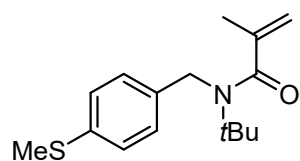

***N*-(*tert*-Butyl)-*N*-(4-(methylthio)benzyl)methacrylamide (10).** White solid (89% yield); m.p. = 98.1–100.3 °C;  $^1\text{H}$  NMR (400 MHz,  $\text{CDCl}_3$ )  $\delta$  7.23 (d,  $J = 8.0$  Hz, 2H), 7.15 (d,  $J = 8.0$  Hz, 2H), 5.01 (s, 1H), 4.93 (s, 1H), 4.63 (s, 2H), 2.48 (s, 3H), 1.93 (s, 3H), 1.42 (s, 9H);  $^{13}\text{C}$  NMR (101 MHz,  $\text{CDCl}_3$ )  $\delta$  174.6, 143.0, 137.0, 136.8, 126.6, 113.3, 57.6, 50.3, 28.5, 20.8, 15.8; HRMS (ESI) ( $[\text{M}+\text{H}]^+$ ) Calcd. For  $\text{C}_{16}\text{H}_{24}\text{NOS}^+$ : 278.1573, Found: 278.1572.

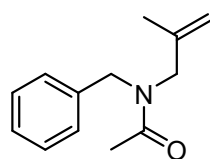

***N*-Benzyl-*N*-(2-methylallyl)acetamide (14).** Colorless oil (67% yield);  $^1\text{H}$  NMR (400 MHz,  $\text{CDCl}_3$ )  $\delta$  7.38–7.27 (m, 3H), 7.26–7.16 (m, 2H), 4.97–4.89 (m, 1H), 4.83–4.73 (m, 1H), 4.58–4.49 (m, 2H), 3.98–3.70 (m, 2H), 2.18–2.14 (m, 3H), 1.70 (s, 3H);  $^{13}\text{C}$  NMR (101 MHz,  $\text{CDCl}_3$ )  $\delta$  171.2, 170.9, 140.4, 139.5, 137.5, 136.5, 128.8, 128.5, 128.1, 127.5, 127.2, 126.2, 112.2, 111.3, 52.9, 50.4, 50.2, 48.0, 21.5, 21.3, 20.0 (2C); HRMS (ESI) ( $[\text{M}+\text{H}]^+$ ) Calcd. For  $\text{C}_{13}\text{H}_{18}\text{NO}^+$ : 204.1383, Found: 204.1384.

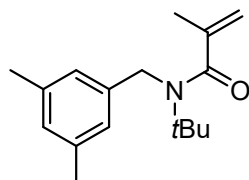

***N*-(*tert*-Butyl)-*N*-(3,5-dimethylbenzyl)methacrylamide (S1).** White solid (63% yield); m.p. = 90.8–92.9 °C;  $^1\text{H}$  NMR (400 MHz,  $\text{CDCl}_3$ )  $\delta$  6.87 (s, 1H), 6.82 (s, 2H), 5.02 (s, 1H), 4.92 (s, 1H), 4.61 (s, 2H), 2.30 (s, 6H), 1.94 (s, 3H), 1.43 (s, 9H);  $^{13}\text{C}$  NMR (101 MHz,  $\text{CDCl}_3$ )  $\delta$  174.6, 143.0, 140.0, 138.0, 128.4, 123.8, 113.2, 57.6, 50.6, 28.5, 21.3, 20.8; HRMS (ESI) ( $[\text{M}+\text{H}]^+$ ) Calcd. For  $\text{C}_{17}\text{H}_{26}\text{NO}^+$ : 260.2009, Found: 260.2011.

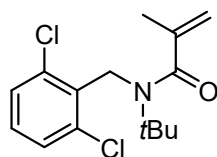

***N*-(*tert*-Butyl)-*N*-(2,6-dichlorobenzyl)methacrylamide (S2).** White solid (55% yield); m.p. = 74.1–76.7 °C;  $^1\text{H}$  NMR (400 MHz,  $\text{CDCl}_3$ )  $\delta$  7.29 (d,  $J$  = 8.0 Hz, 2H), 7.15 (t,  $J$  = 8.0 Hz, 1H), 5.22 (s, 1H), 5.20 (s, 1H), 5.01 (s, 2H), 1.95 (s, 3H), 1.37 (s, 9H);  $^{13}\text{C}$  NMR (101 MHz,  $\text{CDCl}_3$ )  $\delta$  175.6, 143.4, 135.8, 133.9, 129.2, 128.8, 116.5, 57.6, 48.2, 28.4, 19.5; HRMS (ESI) ( $[\text{M}+\text{H}]^+$ ) Calcd. For  $\text{C}_{15}\text{H}_{20}\text{Cl}_2\text{NO}^+$ : 300.0916, Found: 300.0919.

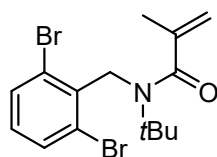

***N*-(*tert*-Butyl)-*N*-(2,6-dibromobenzyl)methacrylamide (S3).** White solid (61% yield); m.p. = 108.3–110.1 °C;  $^1\text{H}$  NMR (600 MHz,  $\text{CDCl}_3$ )  $\delta$  7.53 (d,  $J$  = 7.8 Hz, 2H), 6.97 (t,  $J$  = 7.8 Hz, 1H), 5.23–5.21 (m, 2H), 5.00 (s, 2H), 1.95 (s, 3H), 1.38 (s, 9H);  $^{13}\text{C}$  NMR (151 MHz,  $\text{CDCl}_3$ )  $\delta$  175.8, 143.4, 136.3, 133.4, 129.6, 125.7, 116.8, 58.0, 53.1, 28.7, 19.6; HRMS (ESI) ( $[\text{M}+\text{H}]^+$ ) Calcd. For  $\text{C}_{15}\text{H}_{20}\text{Br}_2\text{NO}^+$ : 387.9906, Found: 387.9907.

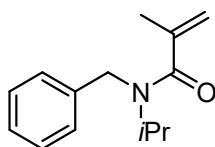

***N*-Benzyl-*N*-iso-propylmethacrylamide (S4).** Colorless oil (58% yield);  $^1\text{H}$  NMR (400 MHz,  $\text{CDCl}_3$ )  $\delta$  7.32–7.20 (m, 5H), 5.15–5.09 (m, 2H), 4.56 (s, 2H), 4.35 (s, 1H), 2.03–1.98 (m, 3H), 1.13 (d,  $J = 6.8$  Hz, 6H);  $^{13}\text{C}$  NMR (101 MHz,  $\text{CDCl}_3$ )  $\delta$  173.1, 141.5, 139.2, 128.3, 126.8, 114.0, 50.1, 42.8, 21.5, 20.7; HRMS (ESI) ( $[\text{M}+\text{H}]^+$ ) Calcd. For  $\text{C}_{14}\text{H}_{20}\text{NO}^+$ : 218.1539, Found: 218.1541.

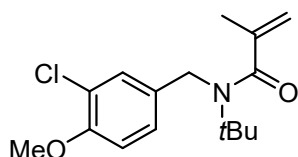

***N*-(*tert*-Butyl)-*N*-(3-chloro-4-methoxybenzyl)methacrylamide (S5).** White solid (77% yield); m.p. = 80.2–82.9 °C;  $^1\text{H}$  NMR (400 MHz,  $\text{CDCl}_3$ )  $\delta$  7.22 (d,  $J = 2.0$  Hz, 1H), 7.11 (dd,  $J = 8.4, 2.0$  Hz, 1H), 6.93 (d,  $J = 8.4$  Hz, 1H), 5.01 (s, 1H), 4.94 (s, 1H), 4.60 (s, 2H), 3.89 (s, 3H), 1.94 (s, 3H), 1.43 (s, 9H);  $^{13}\text{C}$  NMR (101 MHz,  $\text{CDCl}_3$ )  $\delta$  174.3, 153.6, 142.8, 133.0, 127.6, 125.1, 122.3, 113.2, 111.8, 57.4, 55.9, 49.5, 28.4, 20.6; HRMS (ESI) ( $[\text{M}+\text{H}]^+$ ) Calcd. For  $\text{C}_{16}\text{H}_{23}\text{ClNO}_2^+$ : 296.1412, Found: 296.1414.

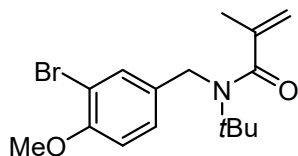

***N*-(3-Bromo-4-methoxybenzyl)-*N*-(*tert*-butyl)methacrylamide (S6).** White solid (72% yield); m.p. = 90.4–92.1 °C;  $^1\text{H}$  NMR (600 MHz,  $\text{CDCl}_3$ )  $\delta$  7.38 (d,  $J = 2.4$  Hz, 1H), 7.14 (dd,  $J = 8.4, 2.4$  Hz, 1H), 6.88 (d,  $J = 8.4$  Hz, 1H), 5.00 (s, 1H), 4.94 (s, 1H), 4.59 (s, 2H), 3.89 (s, 3H), 1.93 (s, 3H), 1.43 (s, 9H);  $^{13}\text{C}$  NMR (151 MHz,  $\text{CDCl}_3$ )  $\delta$  174.5, 154.8, 143.0, 133.6, 130.9, 126.0, 113.4, 111.8, 111.7, 57.6, 56.2, 49.5, 28.6, 20.8; HRMS (ESI) ( $[\text{M}+\text{H}]^+$ ) Calcd. For  $\text{C}_{16}\text{H}_{23}\text{BrNO}^+$ : 340.0907, Found: 340.0910.

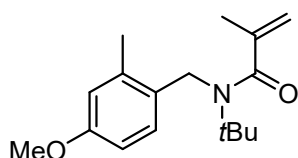

***N*-(*tert*-Butyl)-*N*-(4-methoxy-2-methylbenzyl)methacrylamide (S7).** White solid (64% yield); m.p. = 63.7–66.4 °C;  $^1\text{H}$  NMR (400 MHz,  $\text{CDCl}_3$ )  $\delta$  7.01 (dd,  $J = 8.4, 2.0$  Hz, 1H), 6.95 (d,  $J = 2.0$  Hz, 1H), 6.78 (d,  $J = 8.4$  Hz, 1H), 5.03–4.92 (m, 2H), 4.58 (s, 2H), 3.82 (s, 3H), 2.20 (s, 3H), 1.94 (t,  $J = 1.2$  Hz, 3H), 1.42 (s, 9H);  $^{13}\text{C}$  NMR (101 MHz,  $\text{CDCl}_3$ )  $\delta$  174.6,

156.6, 143.2, 131.5, 128.4, 126.7, 124.4, 113.2, 109.7, 57.5, 55.3, 50.2, 28.6, 20.9, 16.3; HRMS (ESI) ( $[M+H]^+$ ) Calcd. For  $C_{17}H_{26}NO_2^+$ : 276.1958, Found: 276.1960.

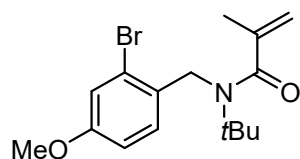

***N*-(2-Bromo-4-methoxybenzyl)-*N*-(*tert*-butyl)methacrylamide (S8).** White solid (69% yield); m.p. = 97.2–99.4 °C;  $^1H$  NMR (400 MHz,  $CDCl_3$ )  $\delta$  7.26 (d,  $J$  = 8.4 Hz 1H), 7.09 (d,  $J$  = 2.4 Hz, 1H), 6.89 (dd,  $J$  = 8.4, 2.4 Hz, 1H), 4.92–4.87 (m, 2H), 4.56 (s, 2H), 3.80 (s, 3H), 1.92 (t,  $J$  = 1.2 Hz, 3H), 1.44 (s, 9H);  $^{13}C$  NMR (101 MHz,  $CDCl_3$ )  $\delta$  174.7, 158.9, 142.7, 130.6, 128.5, 121.5, 118.1, 113.2, 113.0, 57.7, 55.5, 50.4, 28.4, 20.8; HRMS (ESI) ( $[M+H]^+$ ) Calcd. For  $C_{16}H_{23}BrNO_2^+$ : 340.0907, Found: 340.0910.

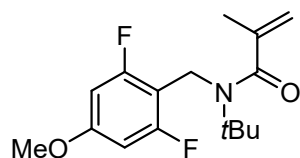

***N*-(*tert*-Butyl)-*N*-(2,6-difluoro-4-methoxybenzyl)methacrylamide (S9).** White solid (65% yield); m.p. = 74.8–76.7 °C;  $^1H$  NMR (400 MHz,  $CDCl_3$ )  $\delta$  6.44 (s, 1H), 6.42 (s, 1H), 5.17–5.13 (m, 1H), 4.75 (s, 2H), 3.78 (s, 3H), 1.97 (s, 3H), 1.37 (s, 9H).  $^{13}C$  NMR (101 MHz,  $CDCl_3$ )  $\delta$  175.0, 161.6 (dd,  $J_{C-F}$  = 246.7, 11.6 Hz), 160.2 (t,  $J_{C-F}$  = 14.5 Hz), 143.4, 115.4, 107.1 (t,  $J_{C-F}$  = 17.0 Hz), 98.1 (d,  $J_{C-F}$  = 13.2, 8.3 Hz), 56.8, 55.6, 40.3 (t,  $J_{C-F}$  = 2.9 Hz), 28.2, 19.8 (t,  $J_{C-F}$  = 1.8 Hz);  $^{19}F$  NMR (376 MHz,  $CDCl_3$ )  $\delta$  –112.9, –113.0; HRMS (ESI) ( $[M+H]^+$ ) Calcd. For  $C_{16}H_{22}F_2NO_2^+$ : 298.1613, Found: 298.1614.

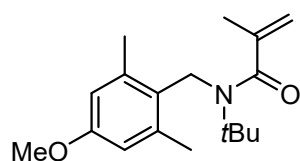

***N*-(*tert*-Butyl)-*N*-(4-methoxy-2,6-dimethylbenzyl)methacrylamide (S10).** White solid (56% yield); m.p. = 78.2–80.9 °C;  $^1H$  NMR (400 MHz,  $CDCl_3$ )  $\delta$  6.53 (s, 2H), 5.18–5.12 (m, 2H), 4.61 (s, 2H), 3.76 (s, 3H), 2.30 (s, 6H), 1.75 (t,  $J$  = 1.2 Hz, 3H), 1.38 (s, 9H);  $^{13}C$  NMR (101 MHz,  $CDCl_3$ )  $\delta$  175.6, 158.1, 144.0, 138.4, 127.7, 116.1, 114.3, 57.7, 55.0, 47.0, 28.4, 21.2, 19.1; HRMS (ESI) ( $[M+H]^+$ ) Calcd. For  $C_{18}H_{28}NO_2^+$ : 290.2115, Found: 290.2116.

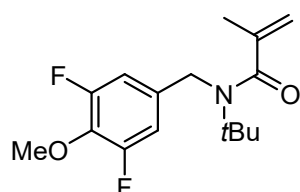

***N*-(*tert*-butyl)-*N*-(3,5-difluoro-4-methoxybenzyl)methacrylamide (S11).** White solid (70% yield); m.p. = 63.6–66.6 °C; <sup>1</sup>H NMR (400 MHz, CDCl<sub>3</sub>) δ 6.79 (s, 1H), 6.77 (s, 1H), 4.99–4.95 (m, 2H), 4.58 (s, 2H), 3.99 (s, 3H), 1.93 (t, *J* = 1.2 Hz, 3H), 1.43 (s, 9H); <sup>13</sup>C NMR (101 MHz, CDCl<sub>3</sub>) δ 174.6, 155.7 (dd, *J*<sub>C-F</sub> = 249.2, 6.4 Hz), 142.7, 135.8 (t, *J*<sub>C-F</sub> = 7.3 Hz), 135.0 (t, *J*<sub>C-F</sub> = 14.1 Hz), 113.6, 109.7 (dd, *J*<sub>C-F</sub> = 23.7, 10.1 Hz), 61.9 (t, *J*<sub>C-F</sub> = 3.2 Hz), 57.8, 49.7, 28.5, 20.7; <sup>19</sup>F NMR (376 MHz, CDCl<sub>3</sub>) δ –127.5 (2F); HRMS (ESI) ([M+H]<sup>+</sup>) Calcd. For C<sub>16</sub>H<sub>22</sub>F<sub>2</sub>NO<sub>2</sub><sup>+</sup>: 298.1613, Found: 298.1615.

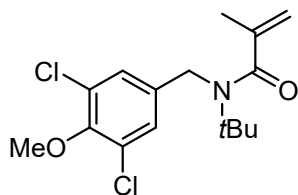

***N*-(*tert*-Butyl)-*N*-(3,5-dichloro-4-methoxybenzyl)methacrylamide (S12).** White solid (78% yield); m.p. = 93.0–95.5 °C; <sup>1</sup>H NMR (400 MHz, CDCl<sub>3</sub>) δ 7.15 (s, 2H), 4.99–4.95 (m, 2H), 4.57 (s, 2H), 3.90 (s, 3H), 1.93 (t, *J* = 1.2 Hz, 3H), 1.44 (s, 9H); <sup>13</sup>C NMR (101 MHz, CDCl<sub>3</sub>) δ 174.5, 151.1, 142.8, 137.8, 129.6, 126.3, 113.6, 60.7, 57.8, 49.5, 28.7, 20.8; HRMS (ESI) ([M+H]<sup>+</sup>) Calcd. For C<sub>16</sub>H<sub>22</sub>Cl<sub>2</sub>NO<sub>2</sub><sup>+</sup>: 330.1022, Found: 330.1024.

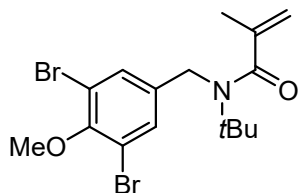

***N*-(*tert*-Butyl)-*N*-(3,5-dibromo-4-methoxybenzyl)methacrylamide (S13).** White solid (69% yield); m.p. = 57.5–60.2 °C; <sup>1</sup>H NMR (400 MHz, CDCl<sub>3</sub>) δ 7.36 (s, 2H), 4.99–4.95 (m, 2H), 4.59 (s, 2H), 3.89 (s, 3H), 1.94 (t, *J* = 1.2 Hz, 3H), 1.44 (s, 9H); <sup>13</sup>C NMR (101 MHz, CDCl<sub>3</sub>) δ 174.4, 152.9, 142.7, 138.9, 130.0, 118.3, 113.5, 60.6, 57.8, 49.2, 28.6, 20.7; HRMS (ESI) ([M+H]<sup>+</sup>) Calcd. For C<sub>16</sub>H<sub>22</sub>Br<sub>2</sub>NO<sub>2</sub><sup>+</sup>: 418.0012, Found: 418.0014.

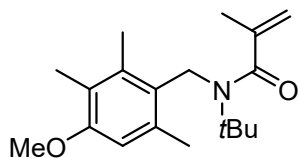

***N*-(*tert*-Butyl)-*N*-(4-methoxy-2,3,6-trimethylbenzyl)methacrylamide (S14).** White solid (52% yield); m.p. = 77.5–79.8 °C; <sup>1</sup>H NMR (400 MHz, CDCl<sub>3</sub>) δ 6.55–6.49 (m, 1H), 5.17–5.10 (m, 2H), 4.65 (s, 2H), 3.79–3.78 (m, 3H), 2.37–2.31 (m, 3H), 2.28–2.21 (m, 3H), 2.12–2.11 (m, 3H), 1.73 (t, *J* = 1.2 Hz, 3H), 1.36–1.19 (m, 9H); <sup>13</sup>C NMR (101 MHz, CDCl<sub>3</sub>) δ 175.7, 156.2, 156.0, 144.1, 137.0, 136.8, 134.8, 134.5, 129.4, 127.5, 123.2, 122.9, 115.9,

110.7, 110.3, 57.6, 55.5, 55.4, 50.4, 47.4, 40.7, 28.9, 28.5, 26.9, 21.4, 19.9, 19.0, 16.8, 15.4, 11.9, 11.8; HRMS (ESI) ([M+H]<sup>+</sup>) Calcd. For C<sub>19</sub>H<sub>30</sub>NO<sub>2</sub><sup>+</sup>: 304.2271, Found: 304.2271.

## References

1. K. Yu, X. Kong, J. Yang, G. Li, B. Xu and Q. Chen, *J. Org. Chem.*, 2021, **86**, 917–928.
2. T. Liu, Y. Li, L. Jiang, J. Wang, K. Jin, R. Zhang and C. Duan, *Org. Biomol. Chem.*, 2020, **18**, 1933–1939.
3. L. Yuan, S. Jiang, Z. Li, Y. Zhu, J. Yu, L. Li, M. Li, S. Tang and R. Sheng, *Org. Biomol. Chem.*, 2018, **16**, 2406–2410.
4. Z. Zhang, X. Tang and W. R. Dolbier, Jr., *Org. Lett.*, 2016, **18**, 1048–1051.

## 9. NMR Spectra for the Obtained Compounds

### Compound 3

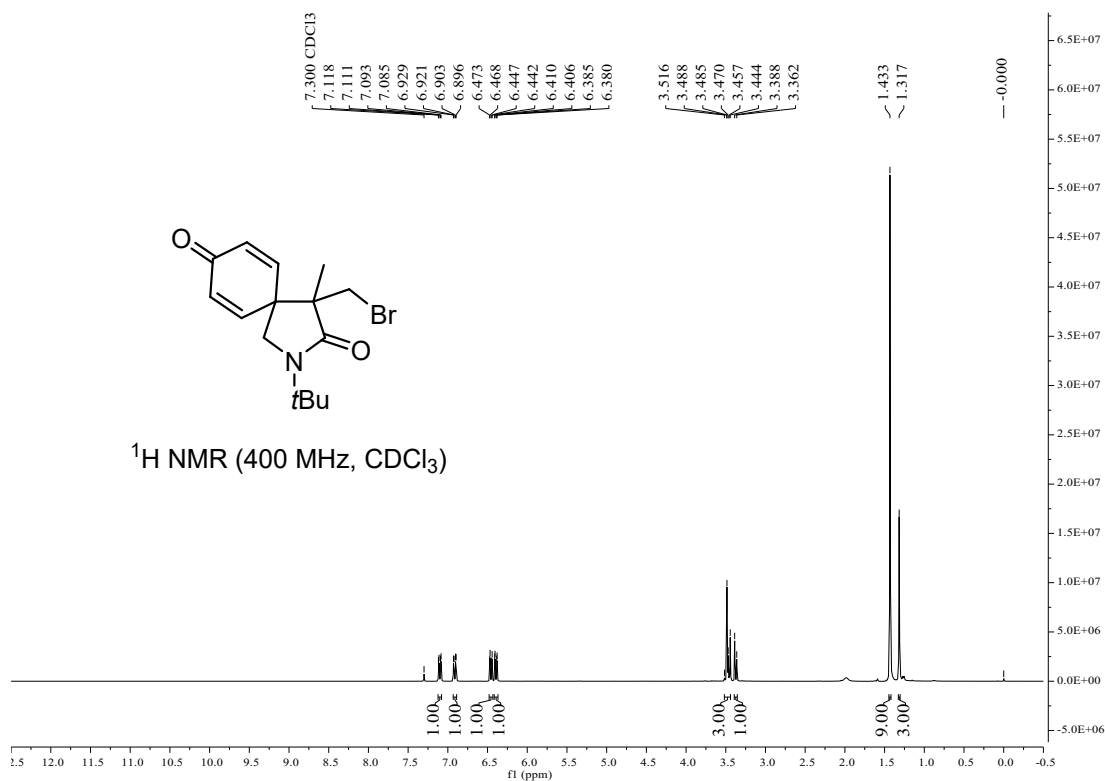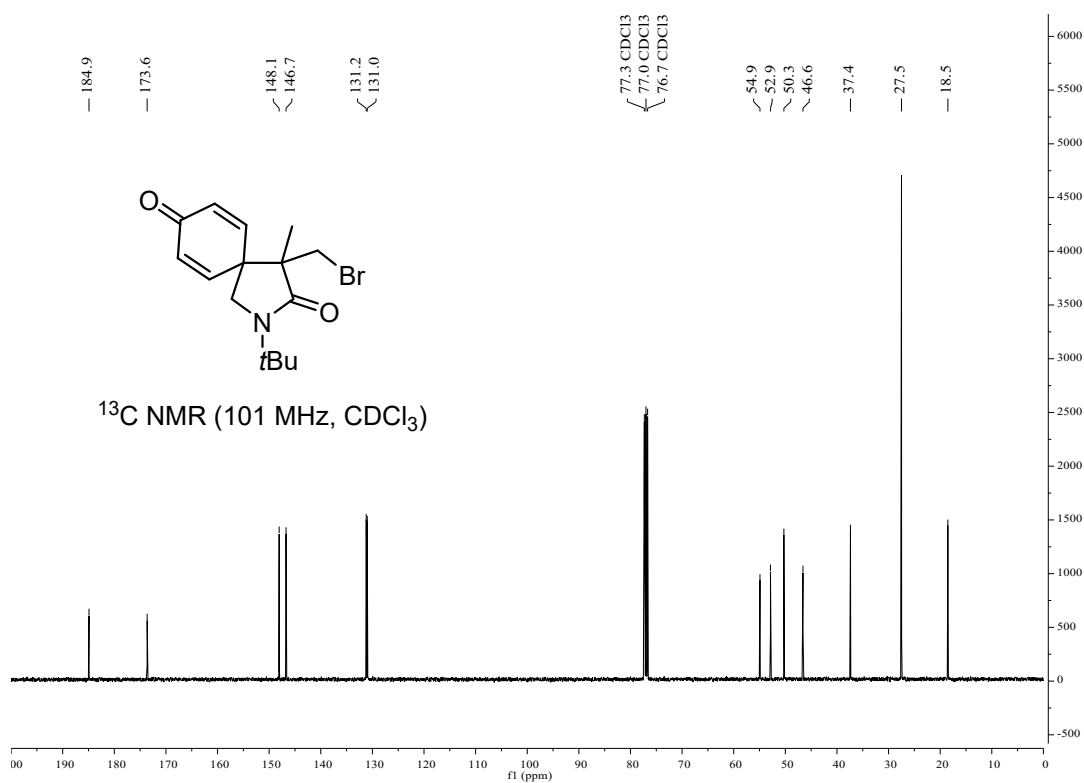



# Compound 15

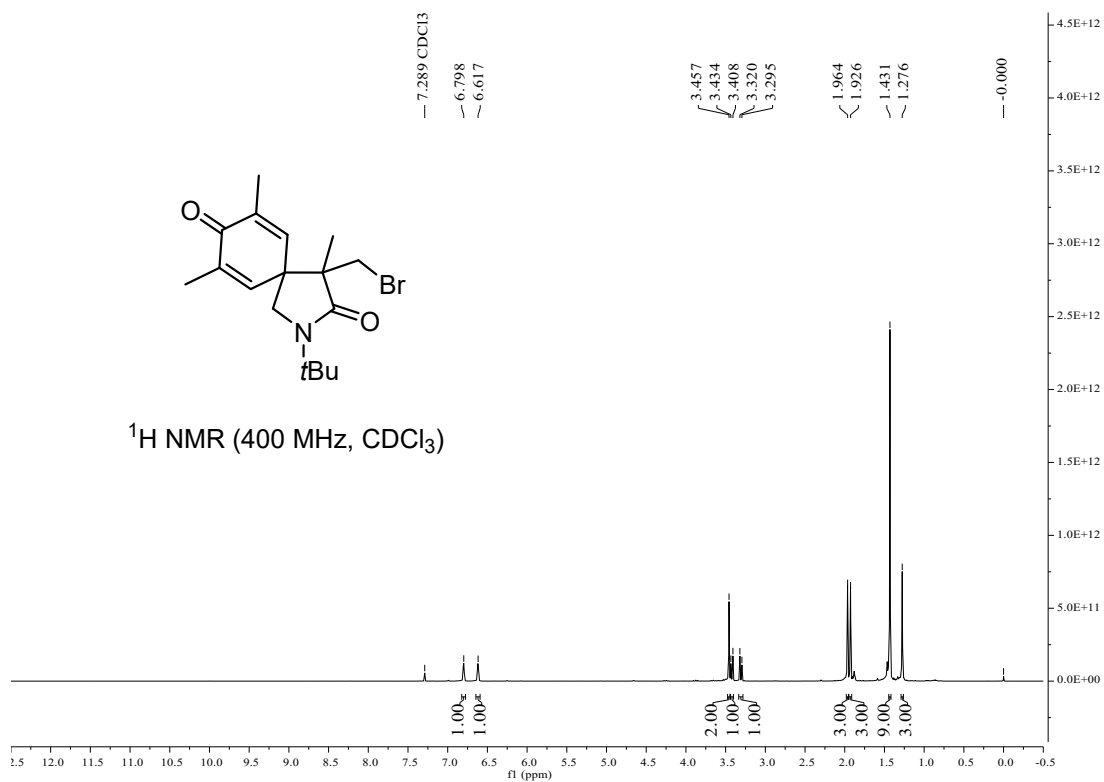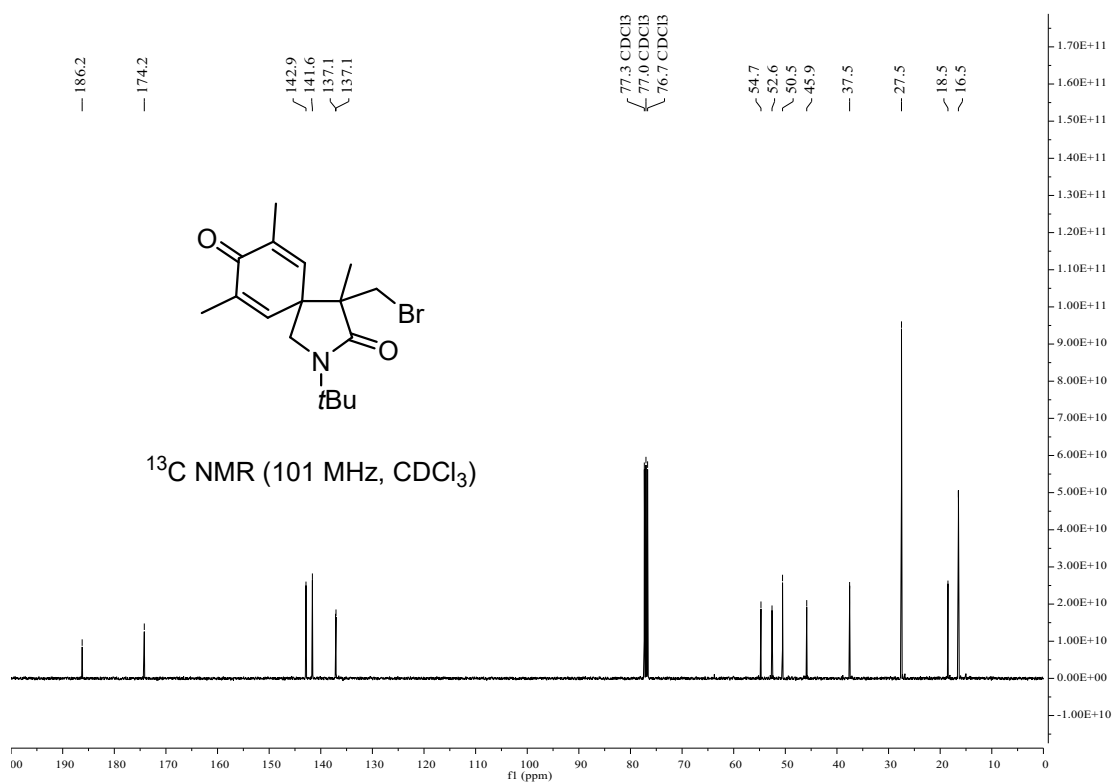

# Compound 16

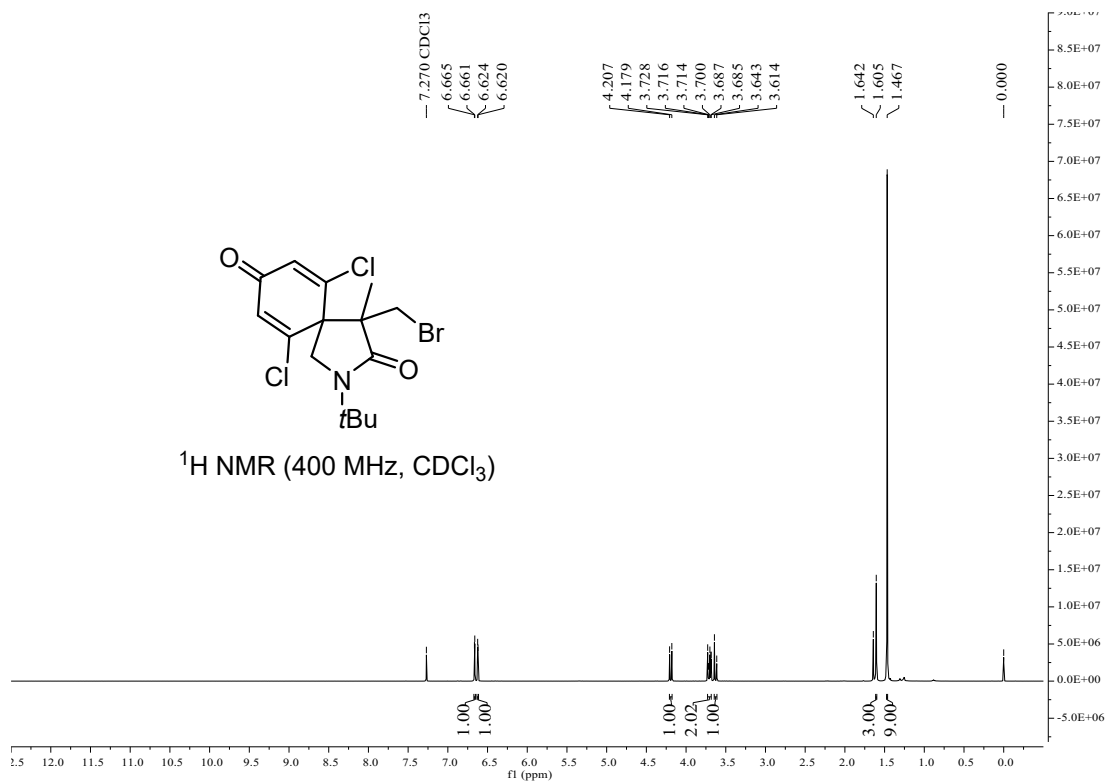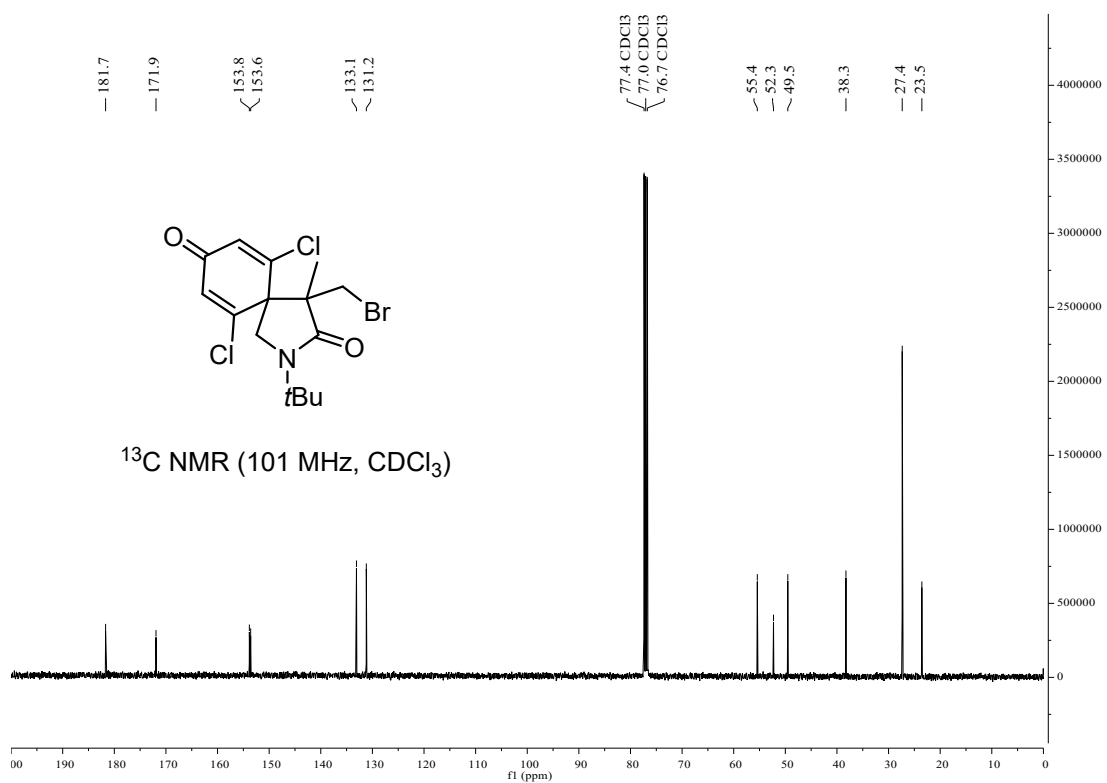

# Compound 17

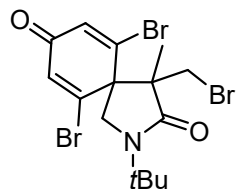

<sup>1</sup>H NMR (600 MHz, CDCl<sub>3</sub>)

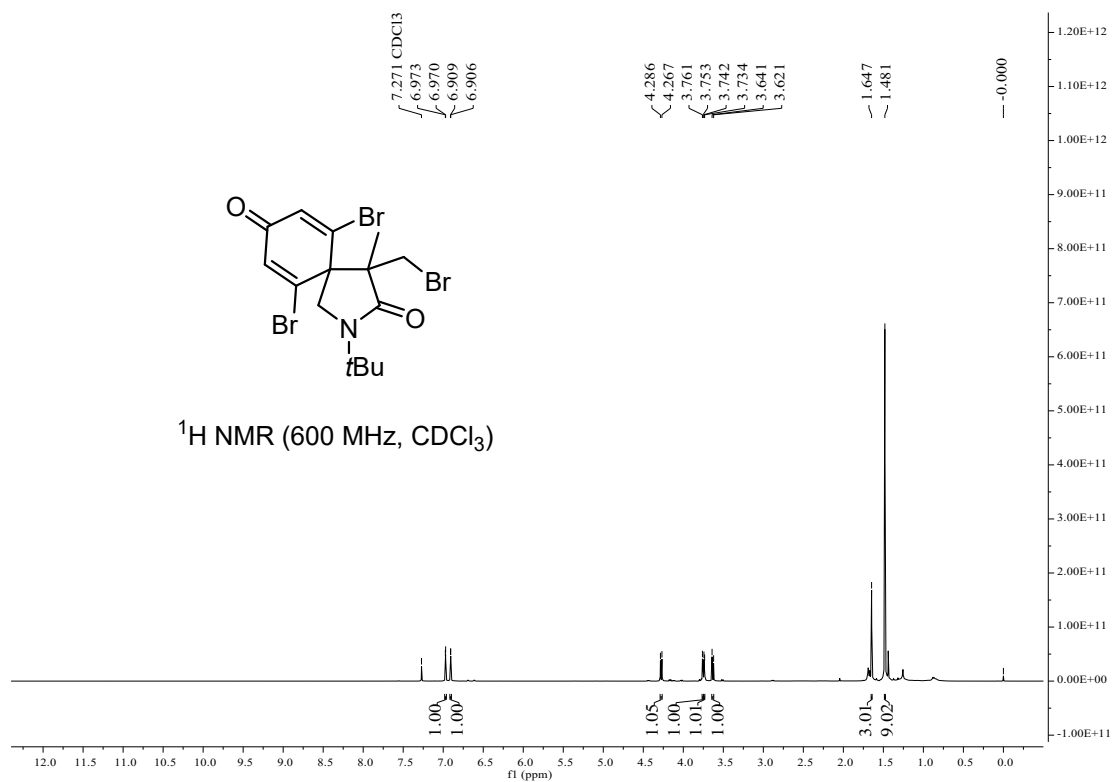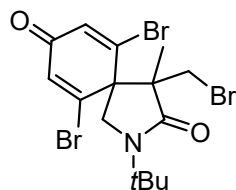

<sup>13</sup>C NMR (151 MHz, CDCl<sub>3</sub>)

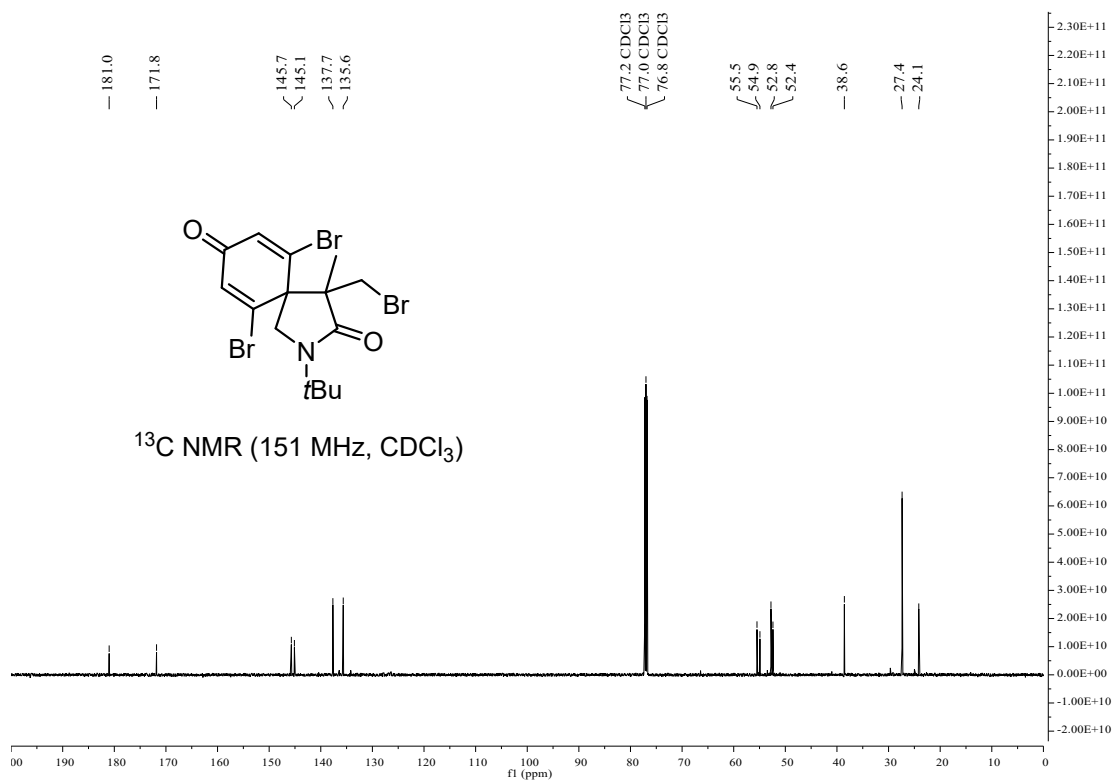

# Compound 18

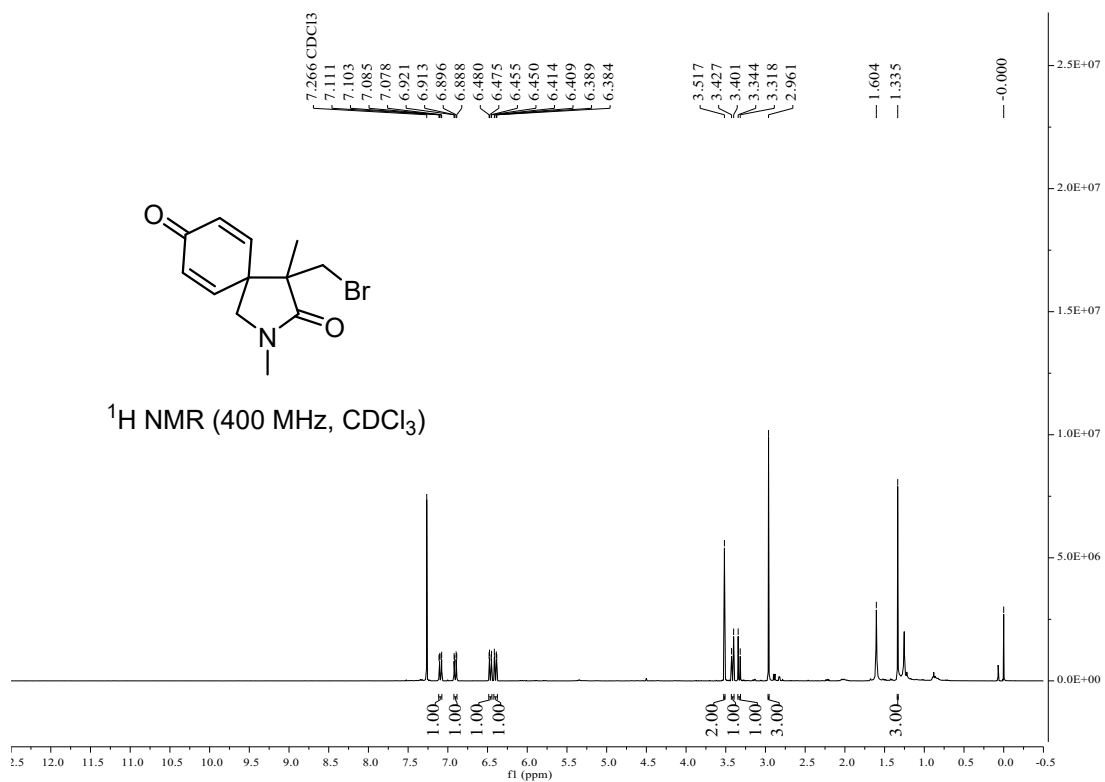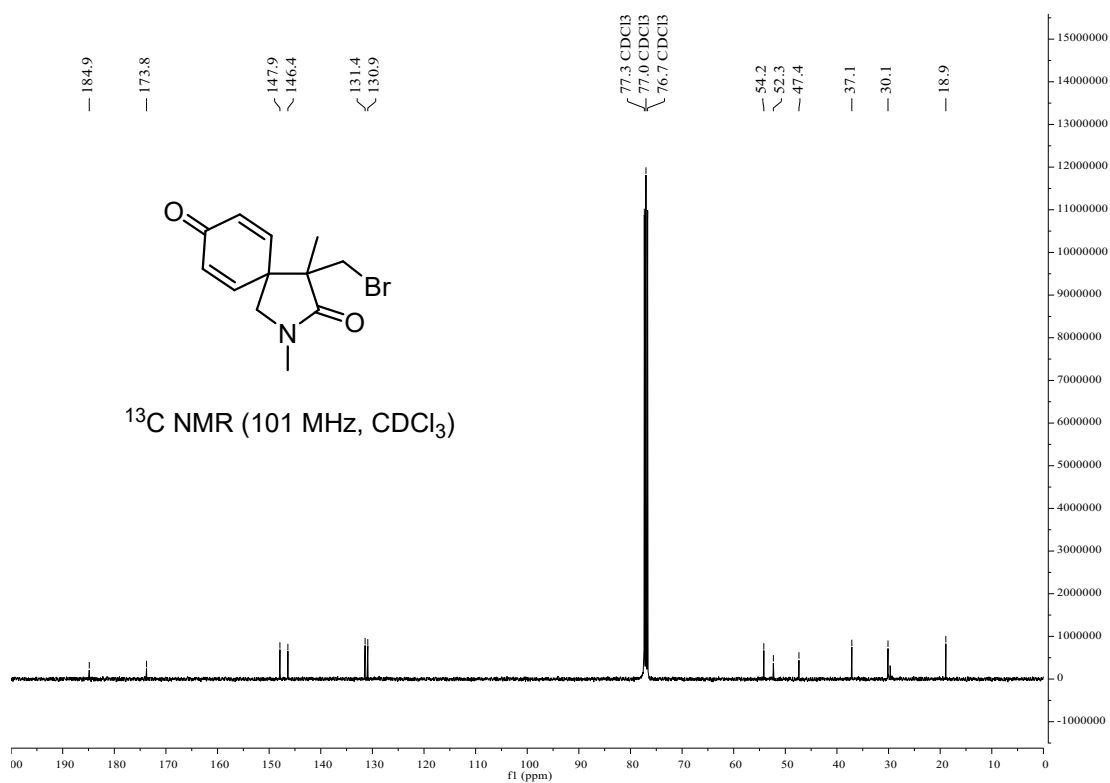

# Compound 19

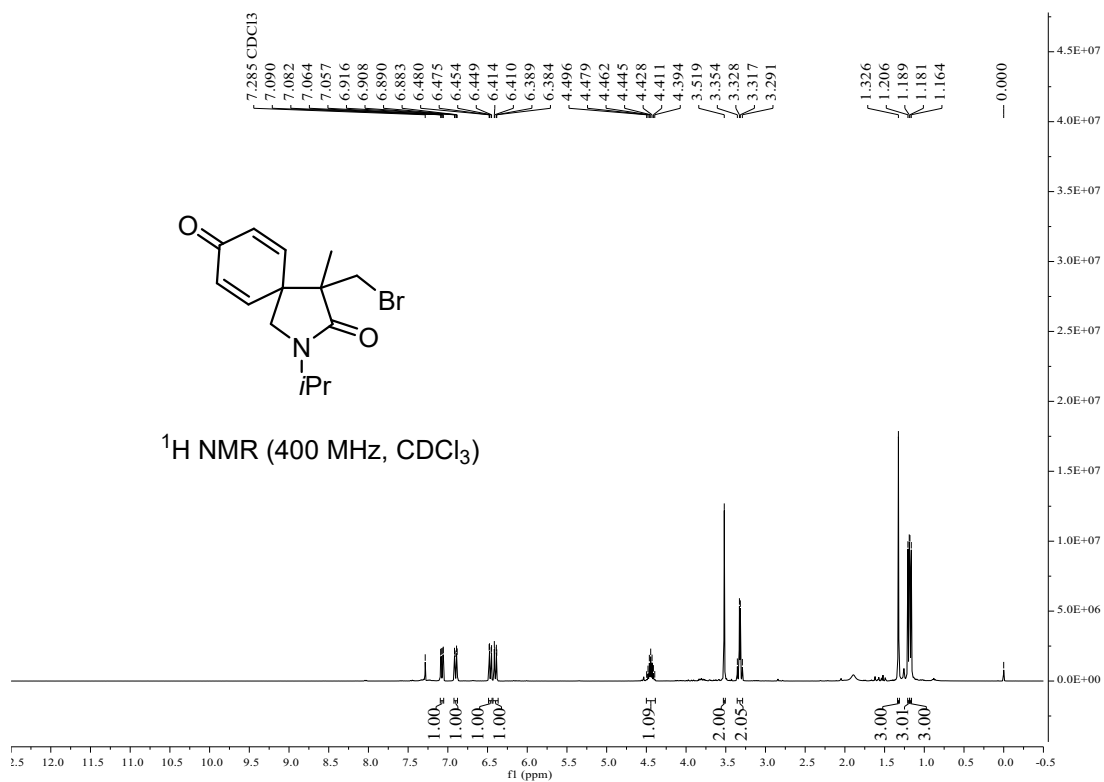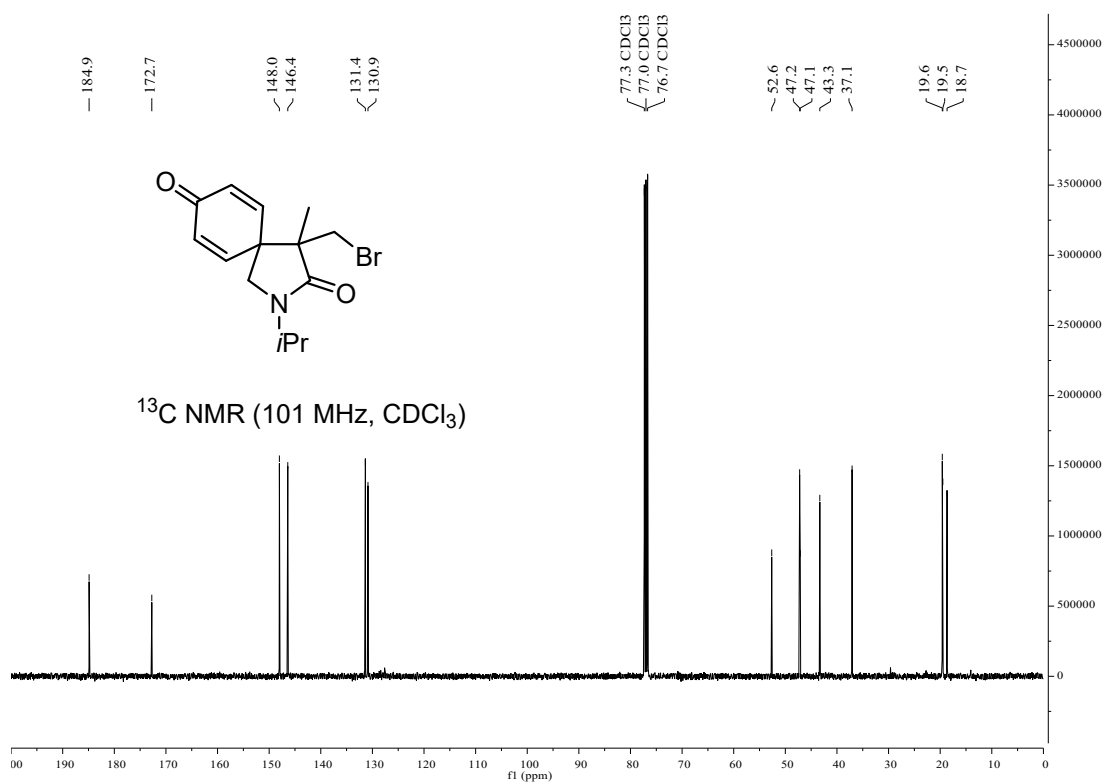

# Compound 20

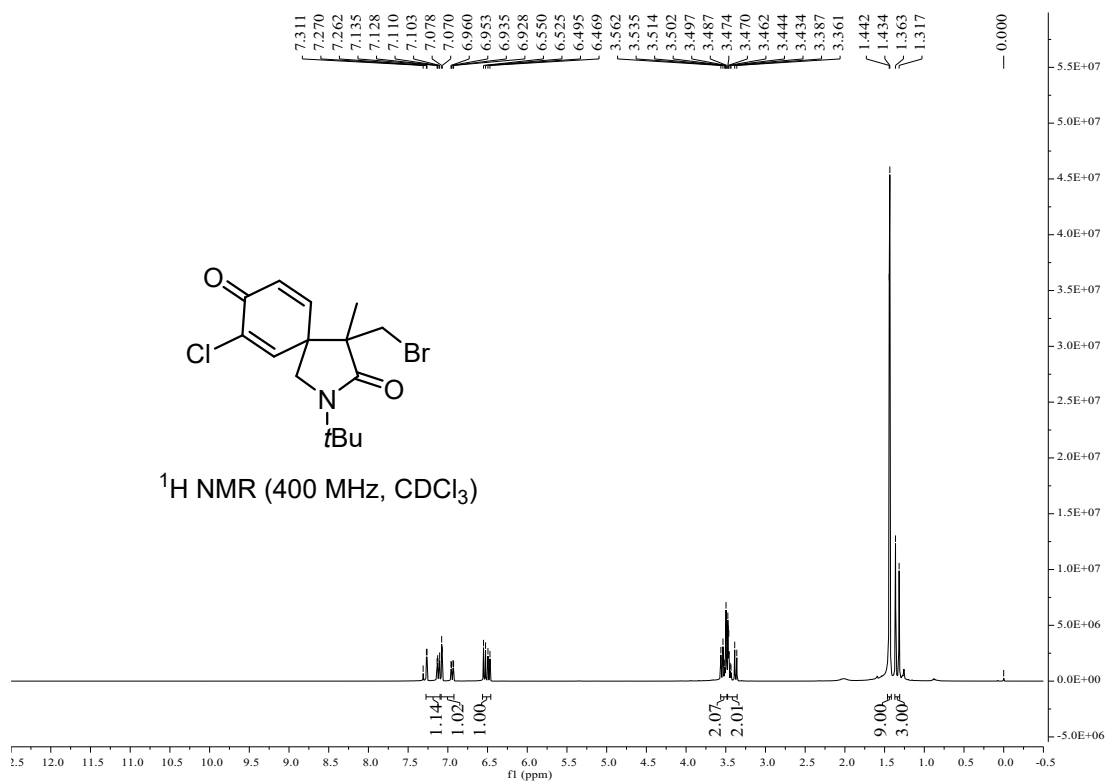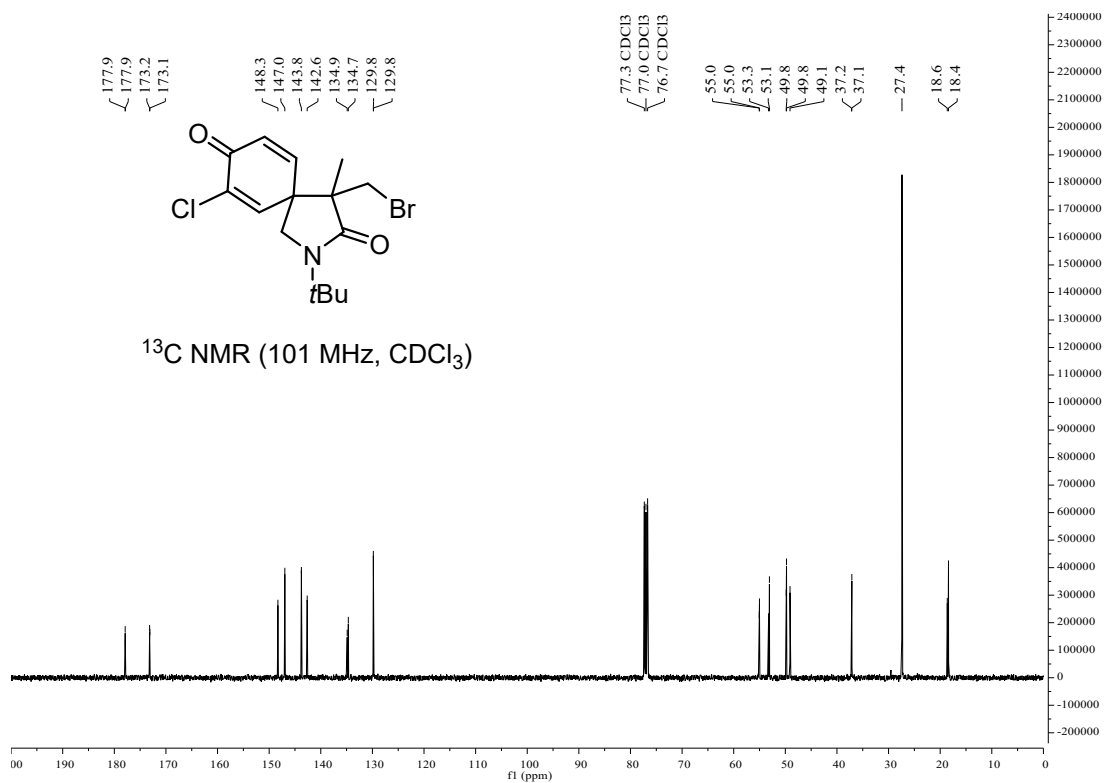

# Compound 21

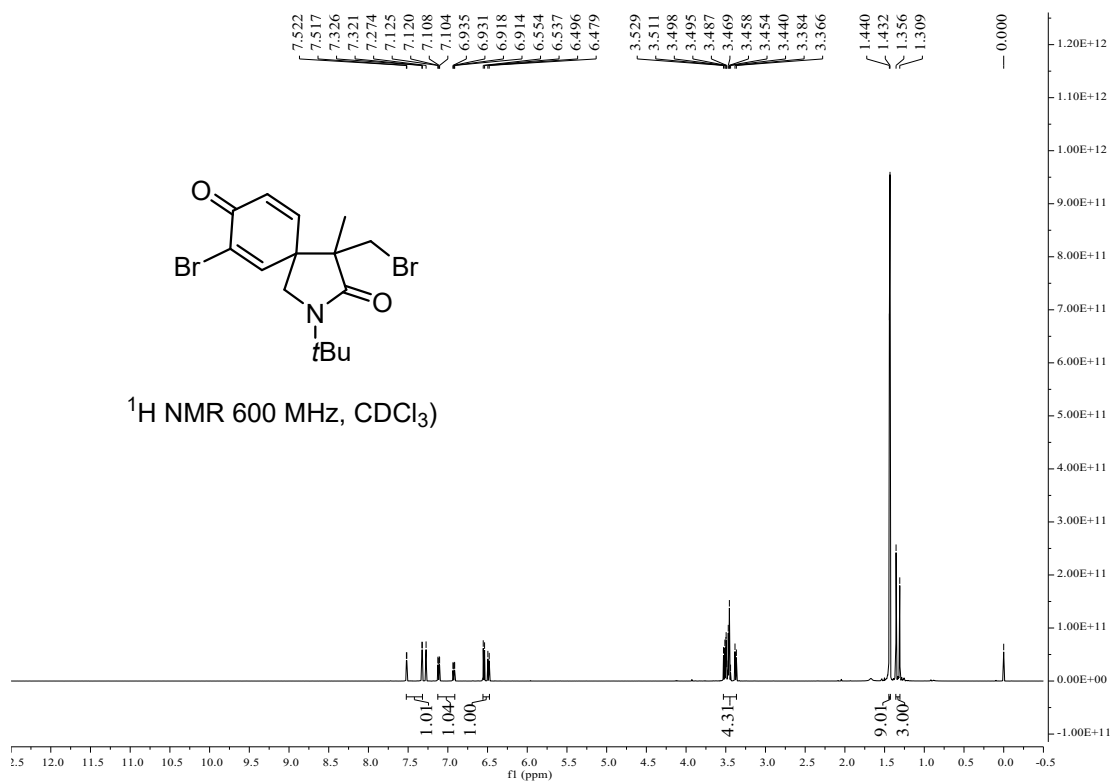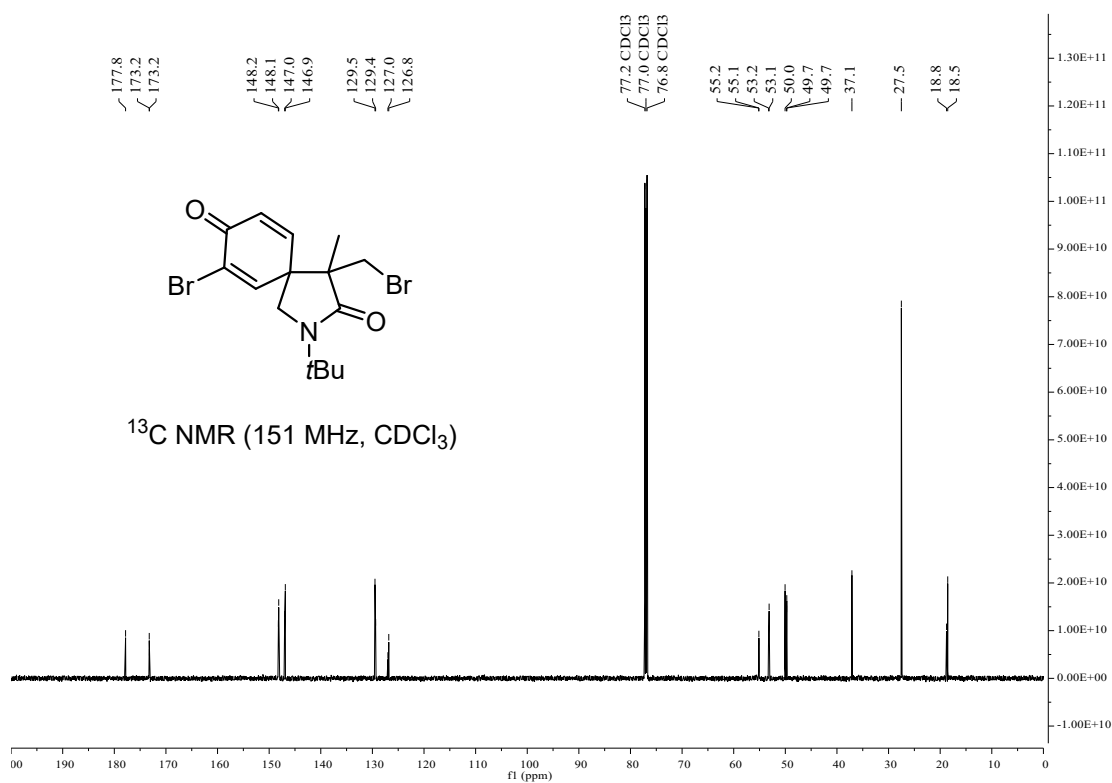

# Compound 22

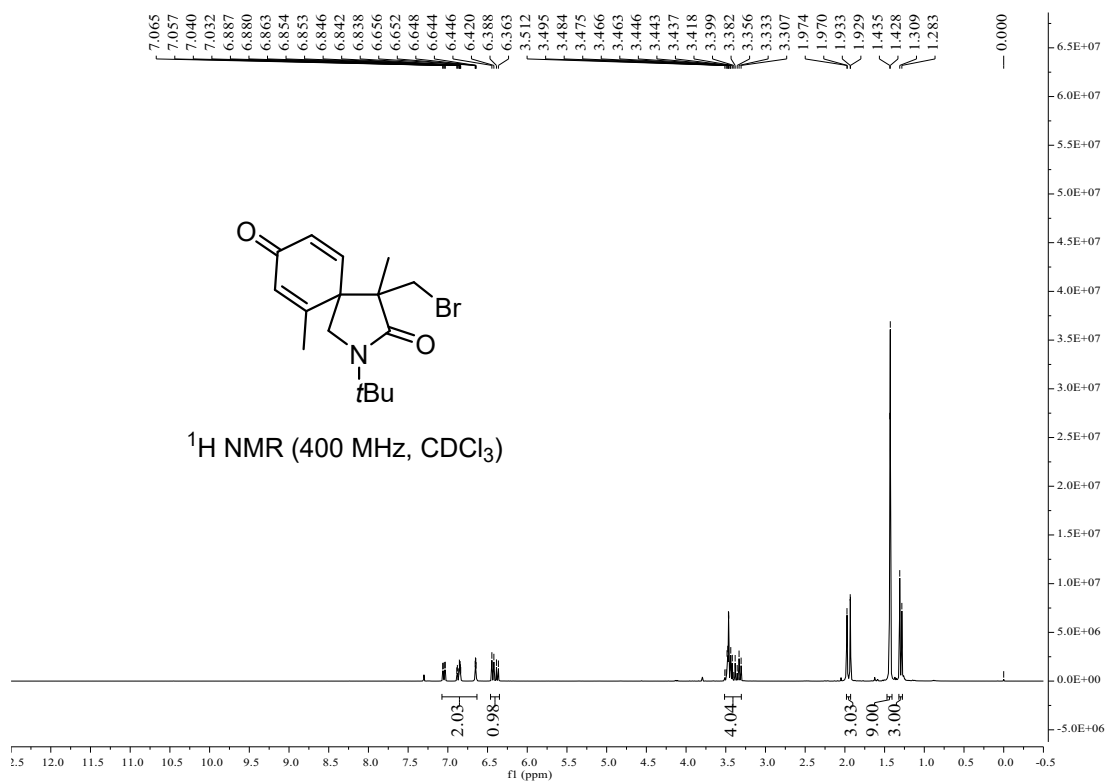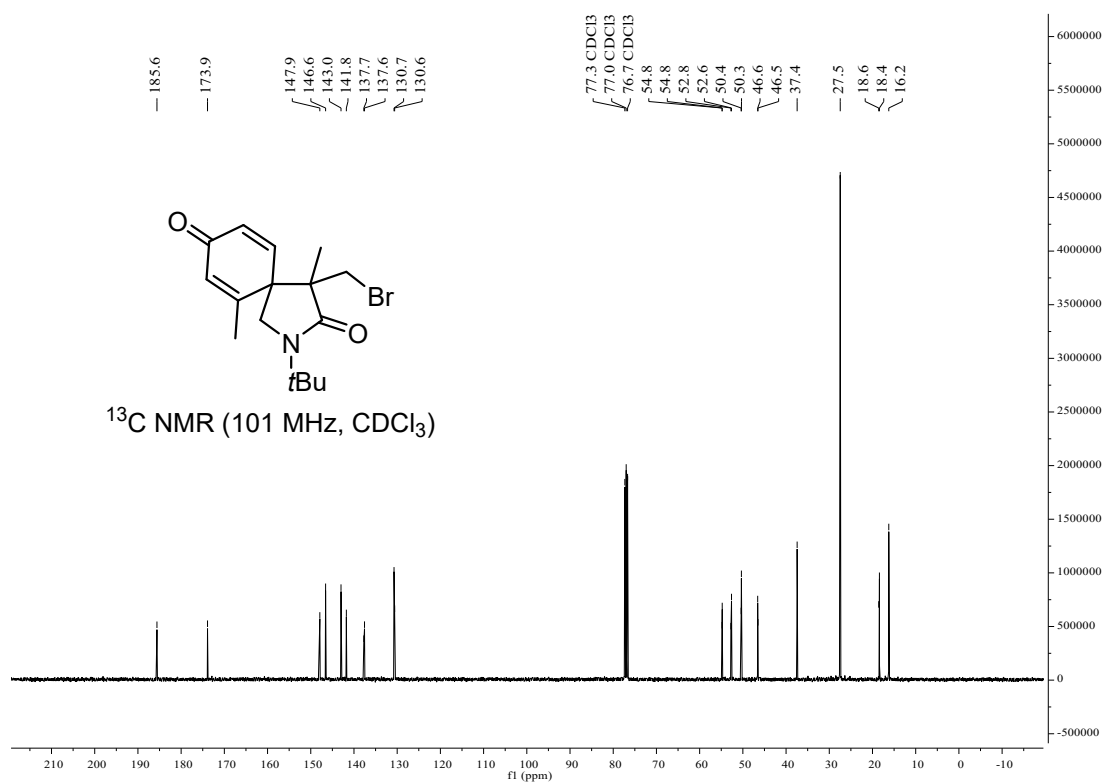



# Compound 23

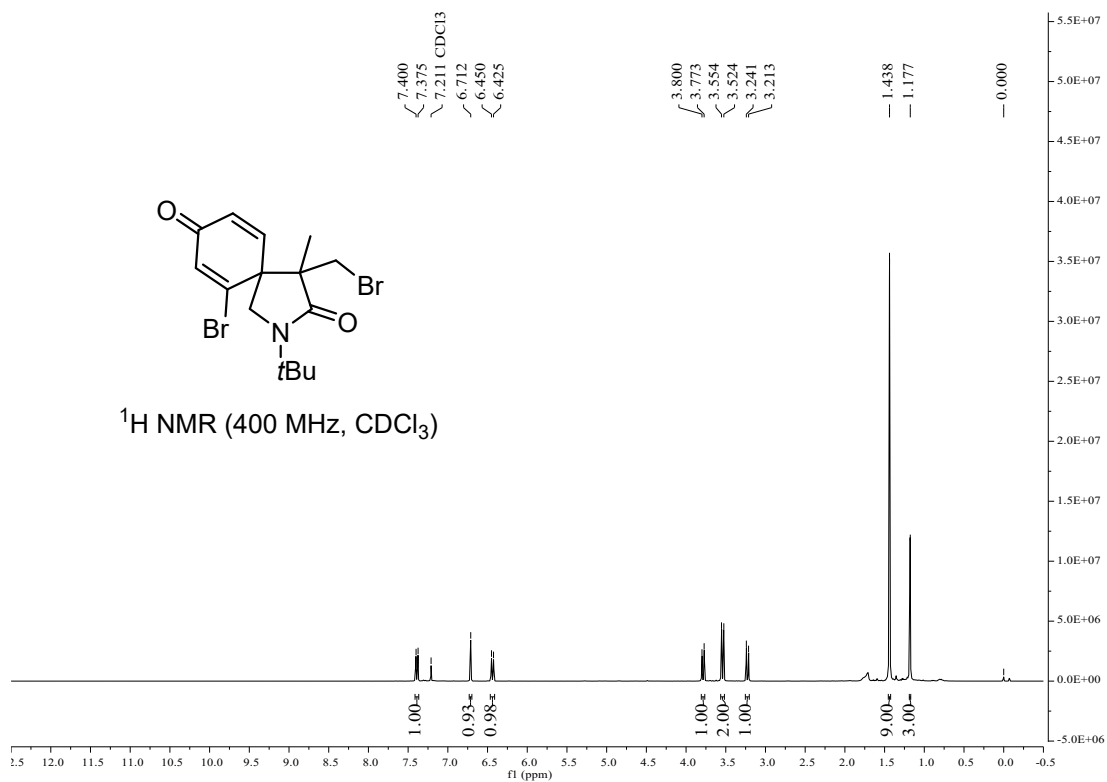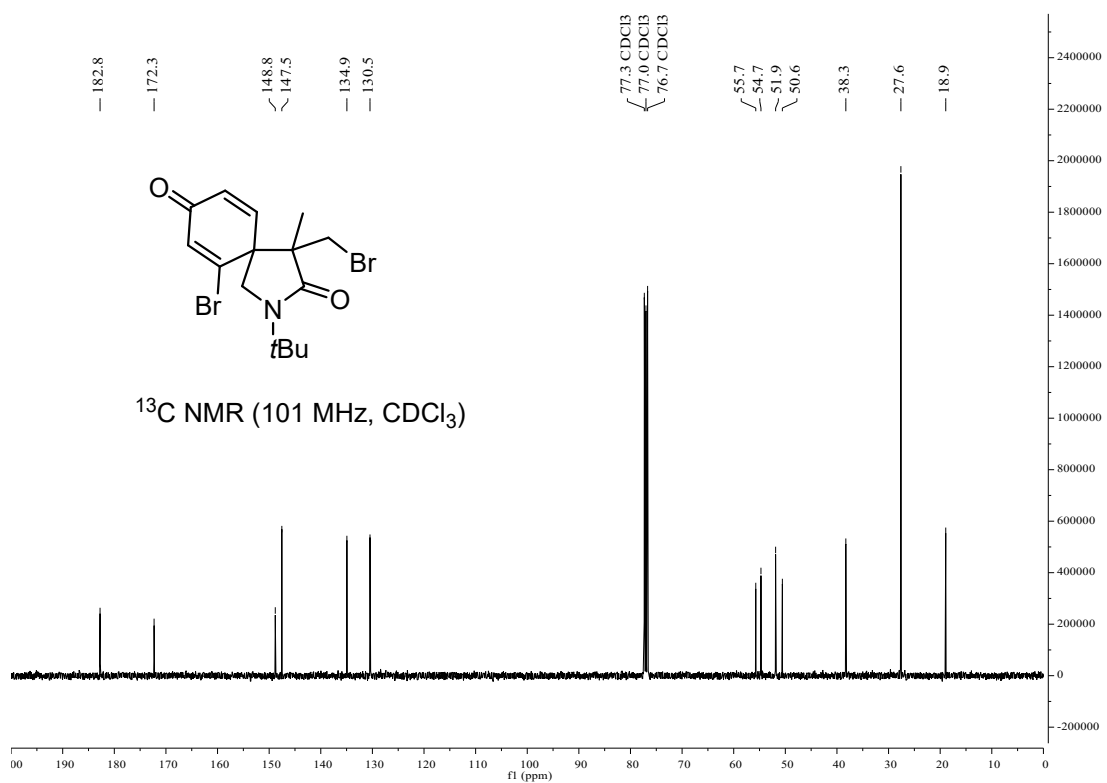

# Compound 23'

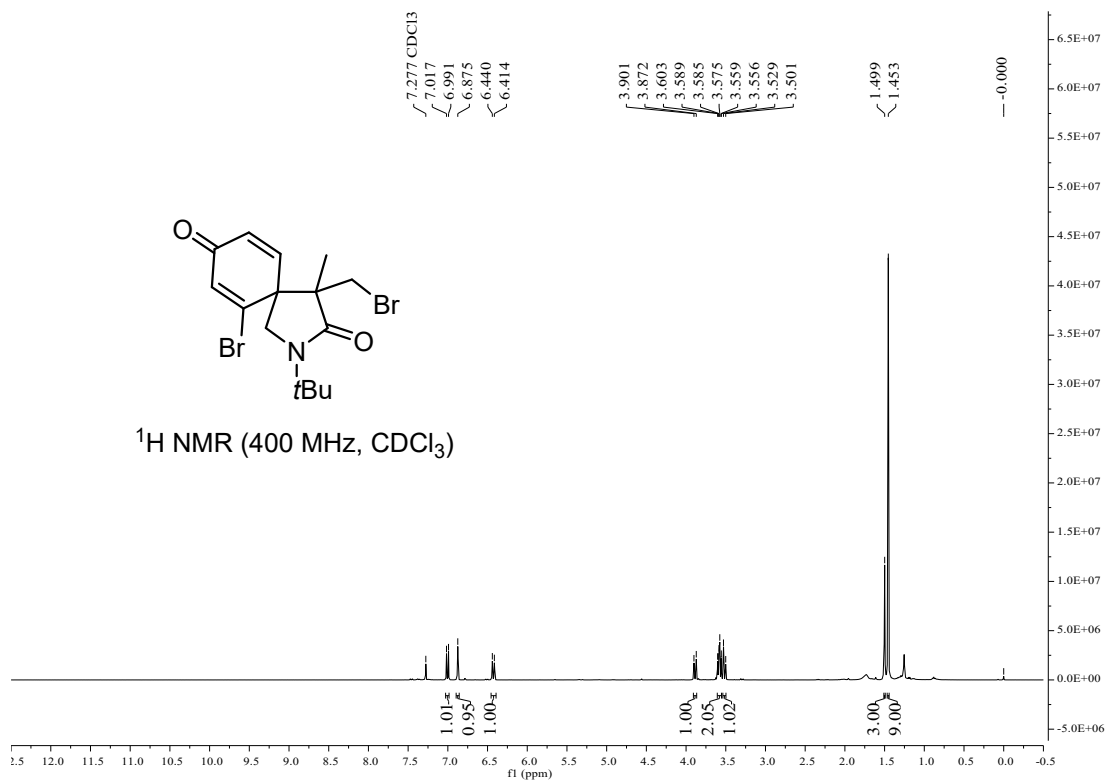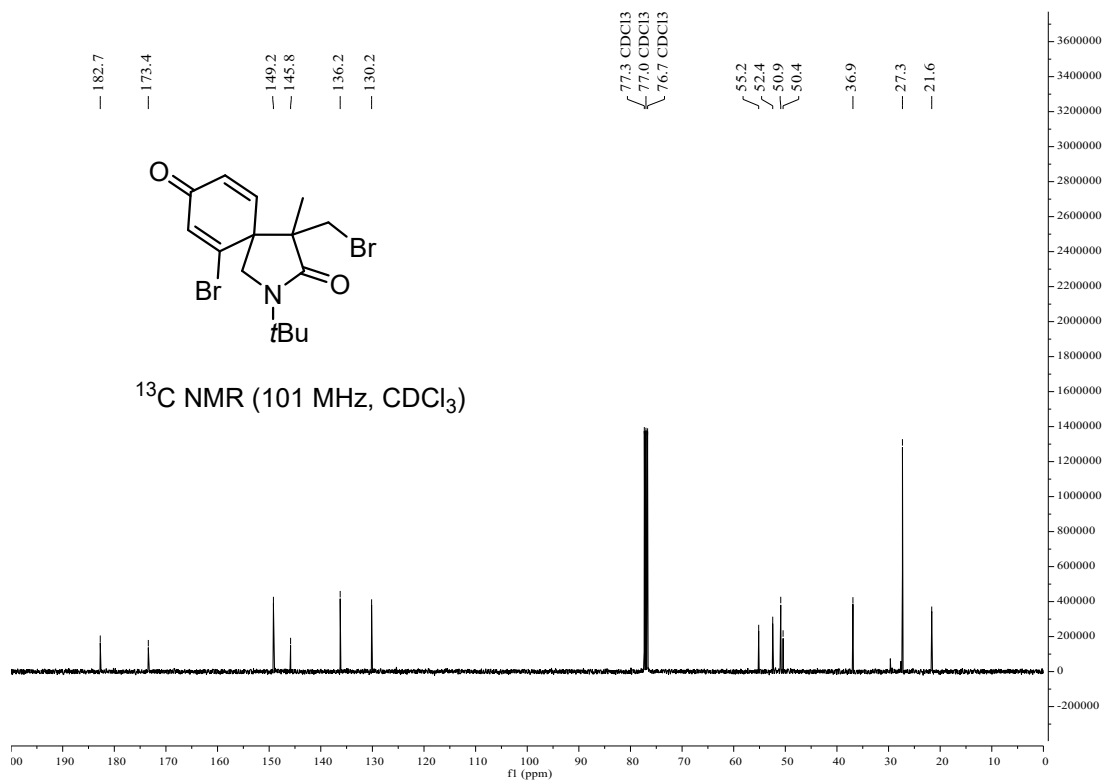

# Compound 24

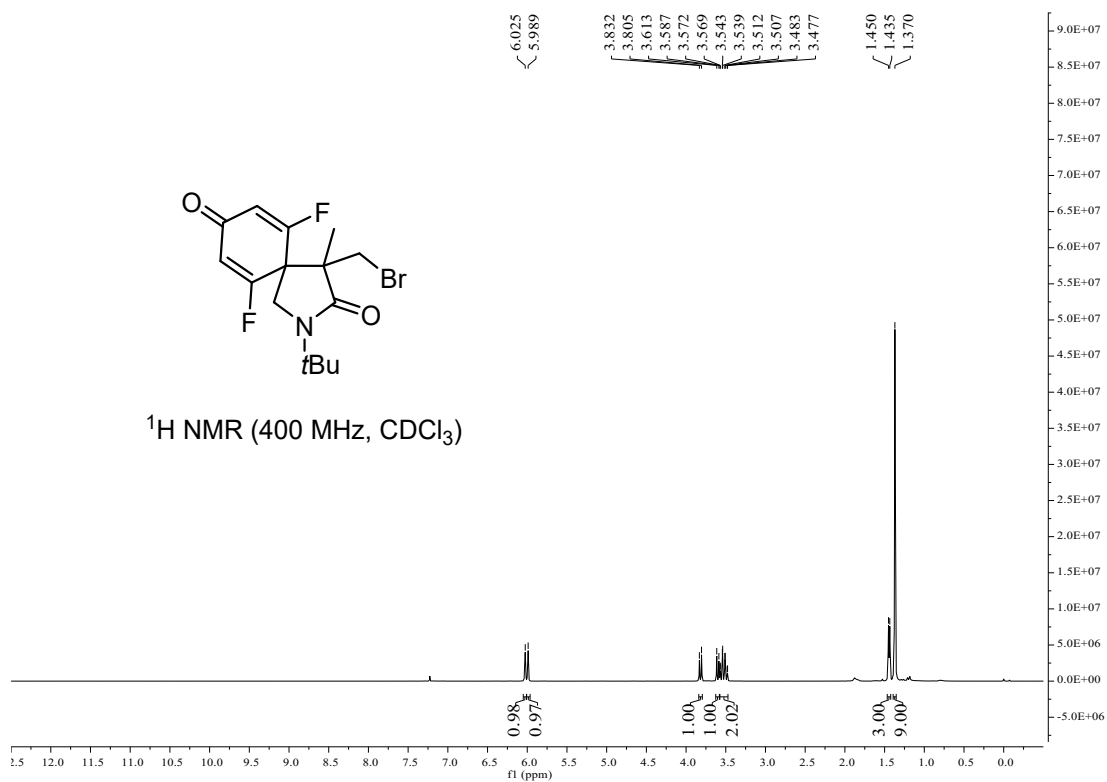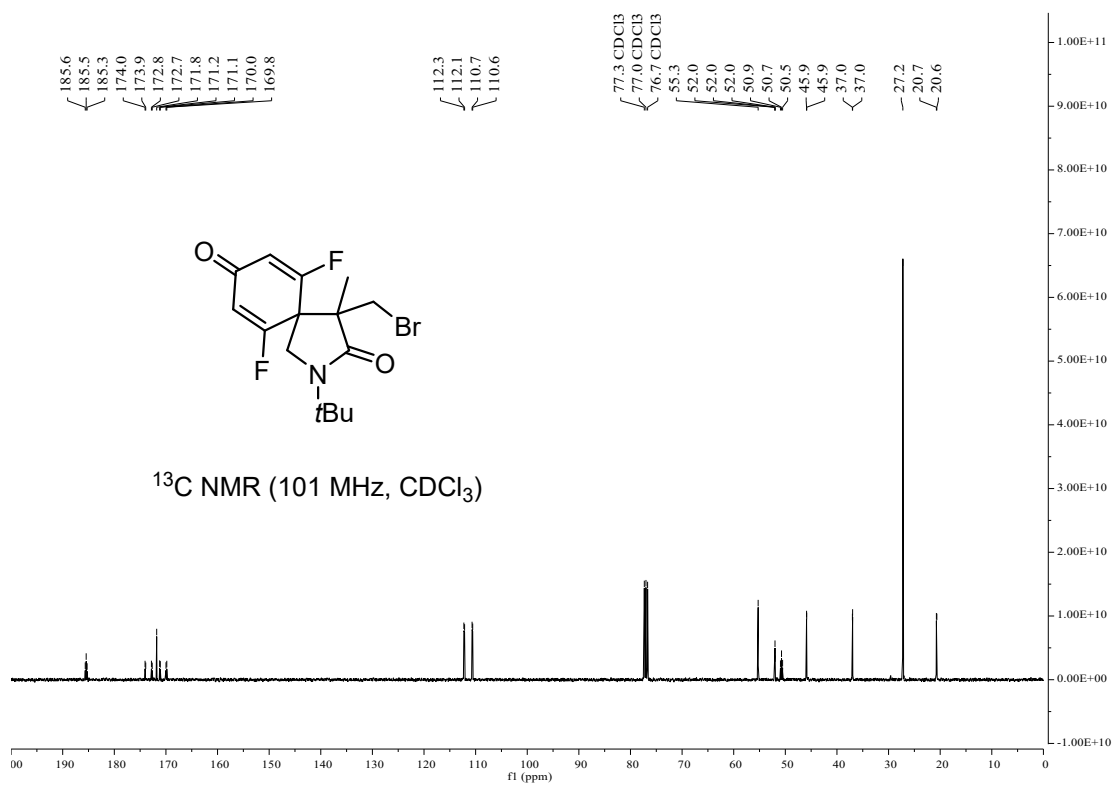

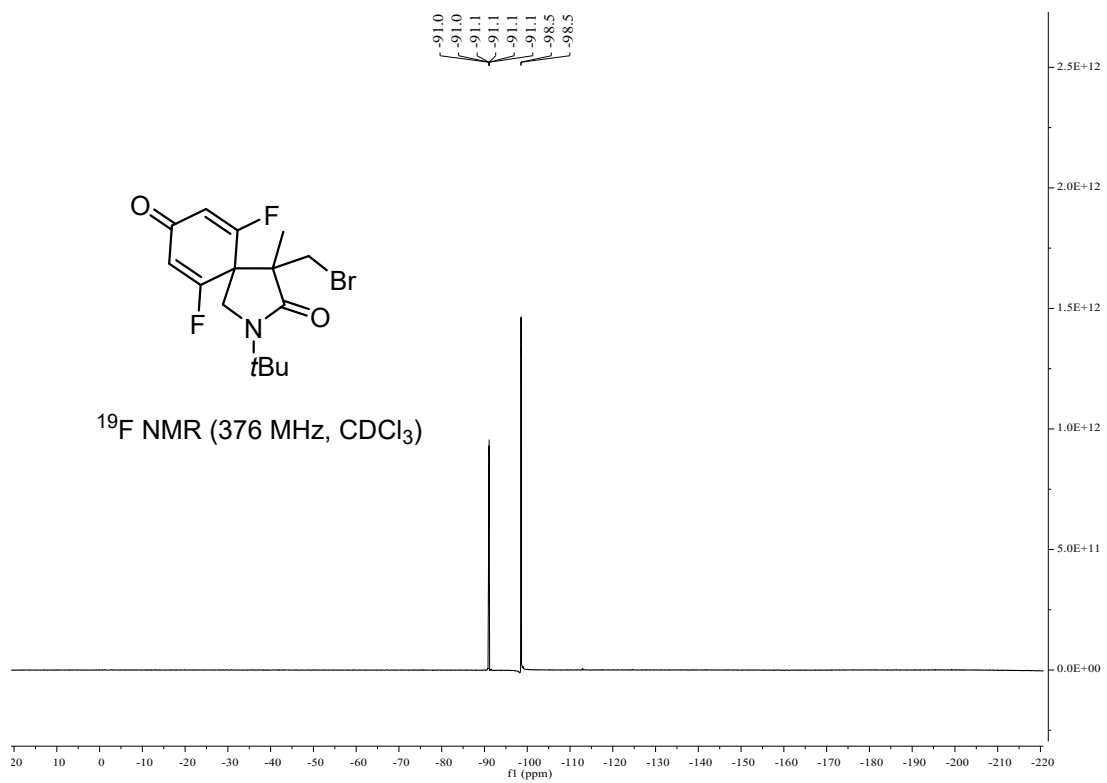



# Compound 26

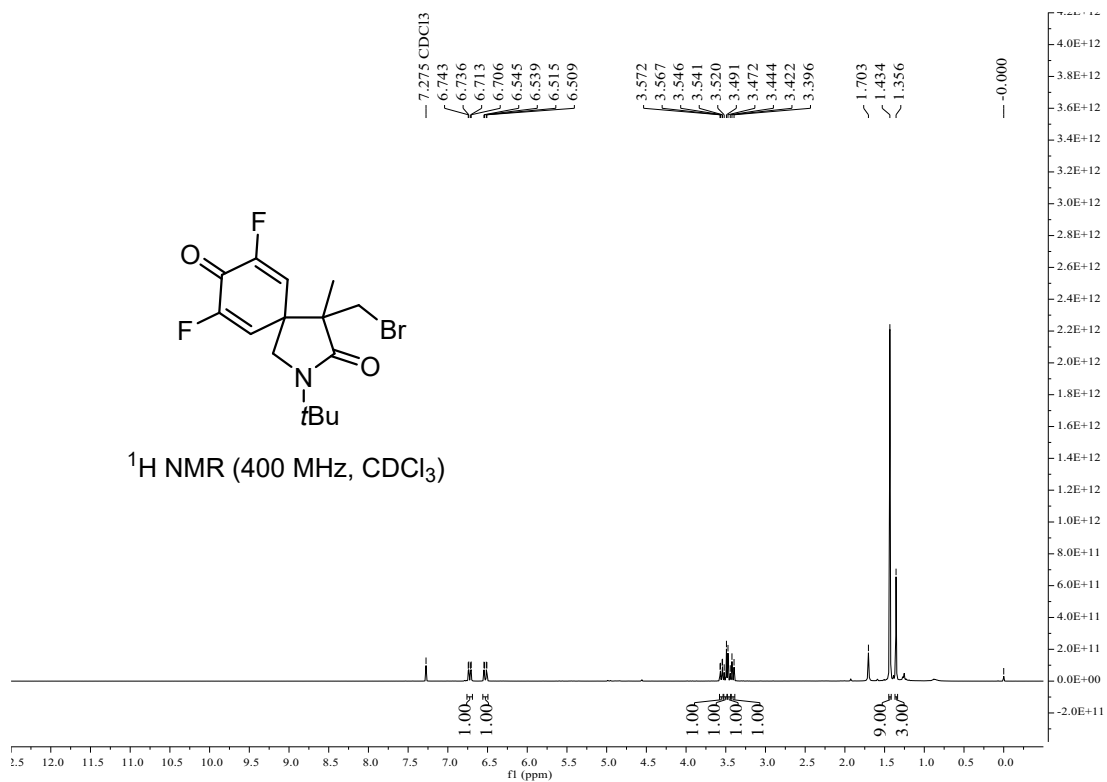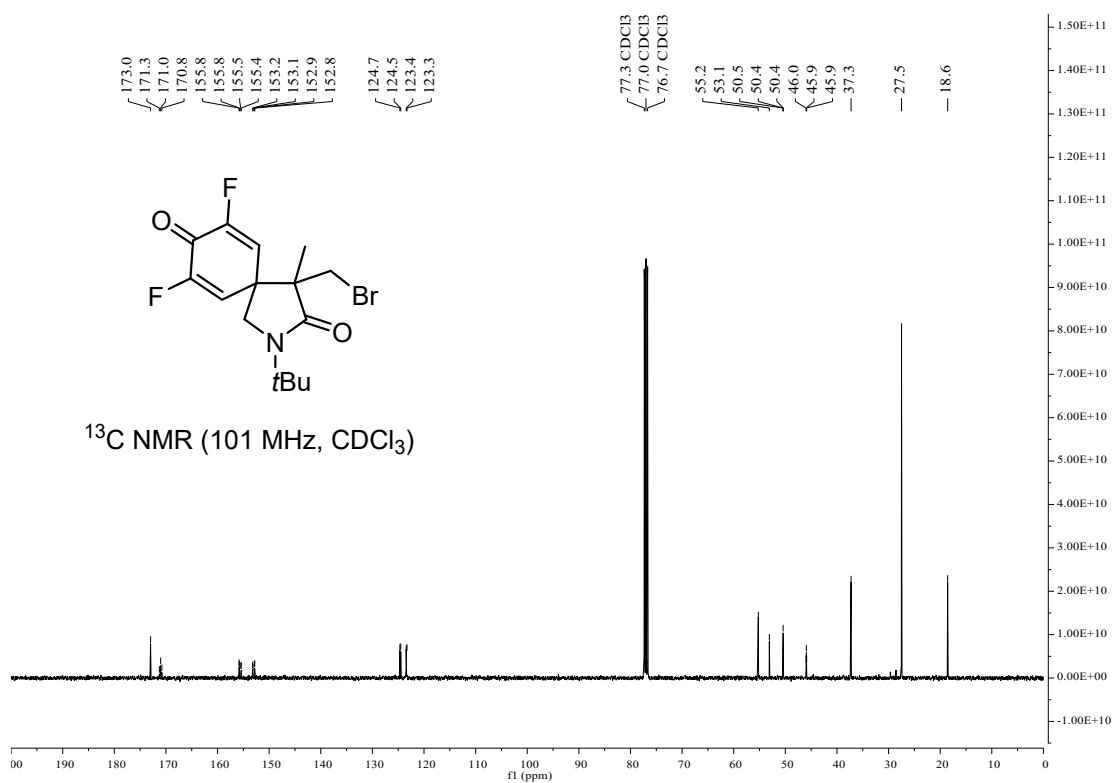

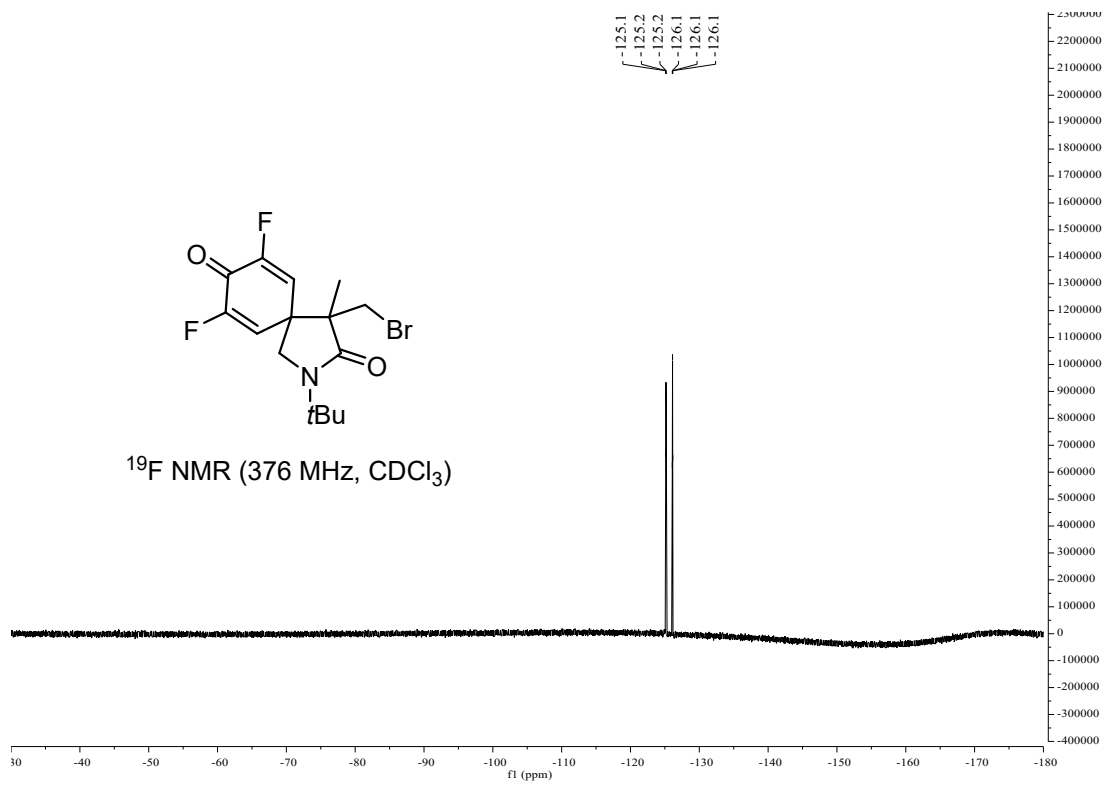

# Compound 27

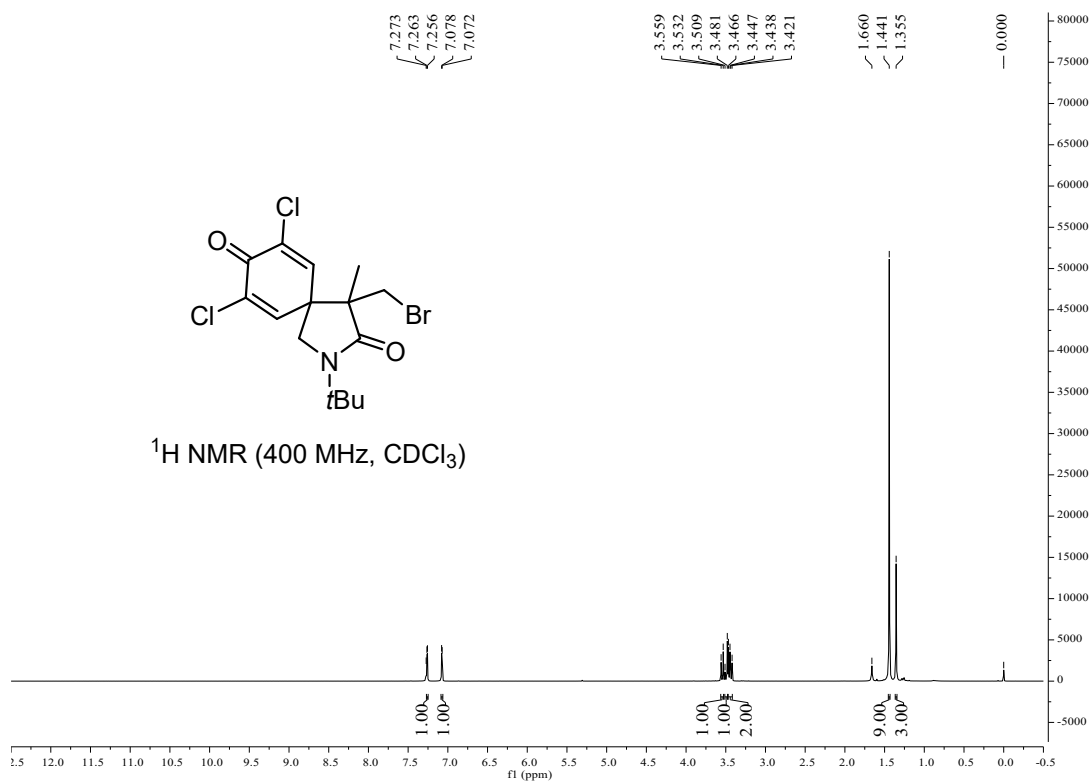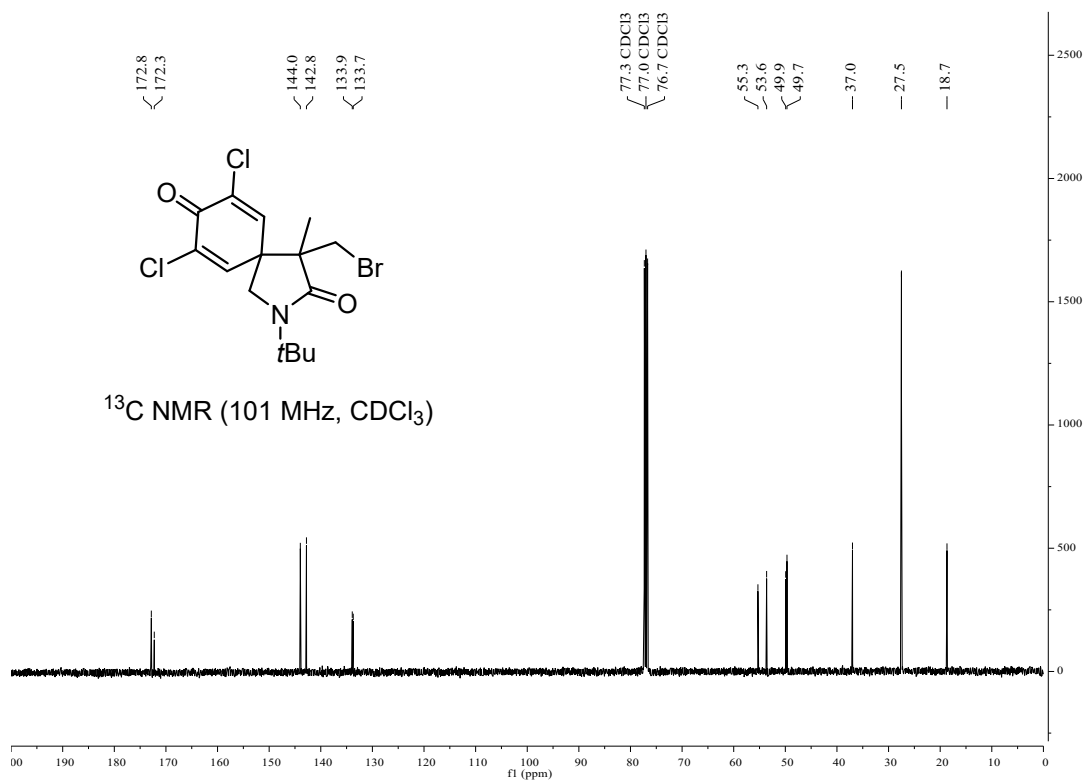



# Compound 28

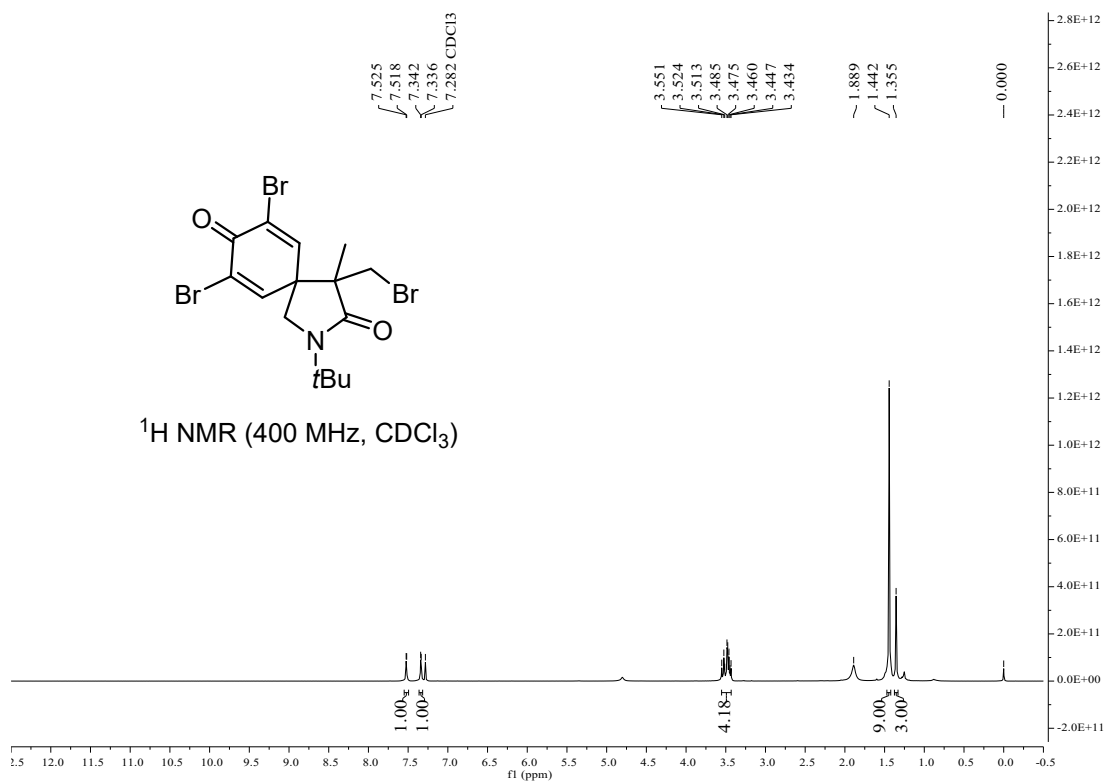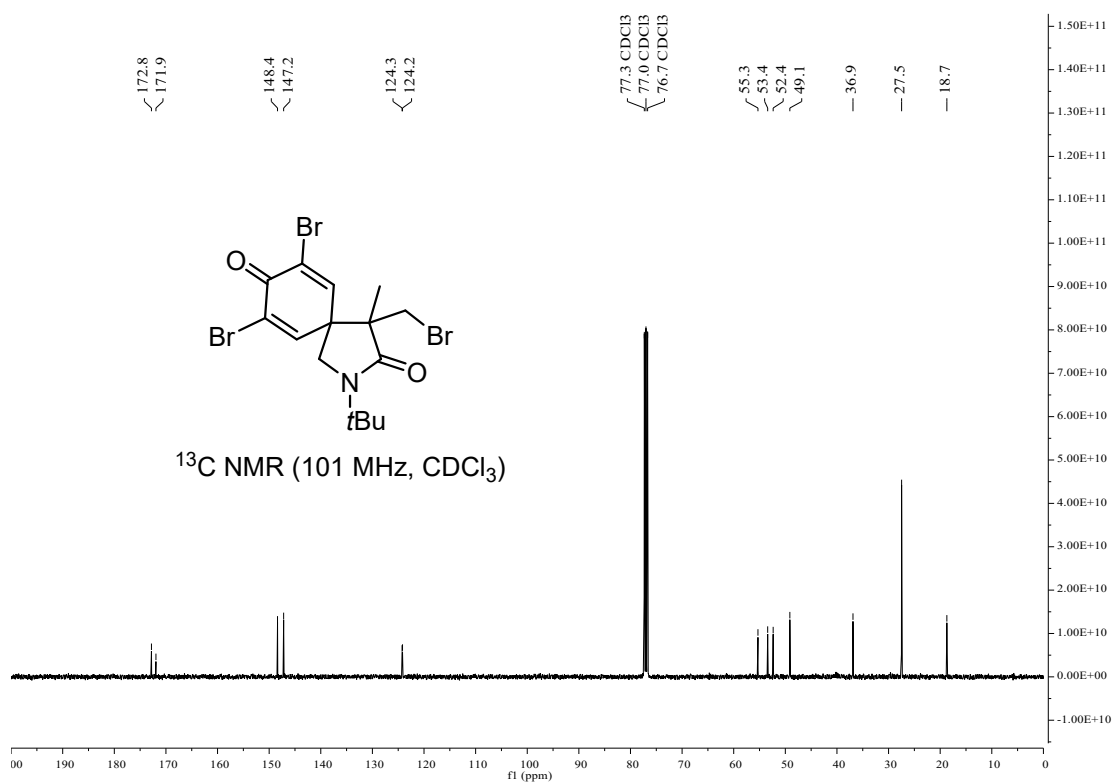

# Compound 29

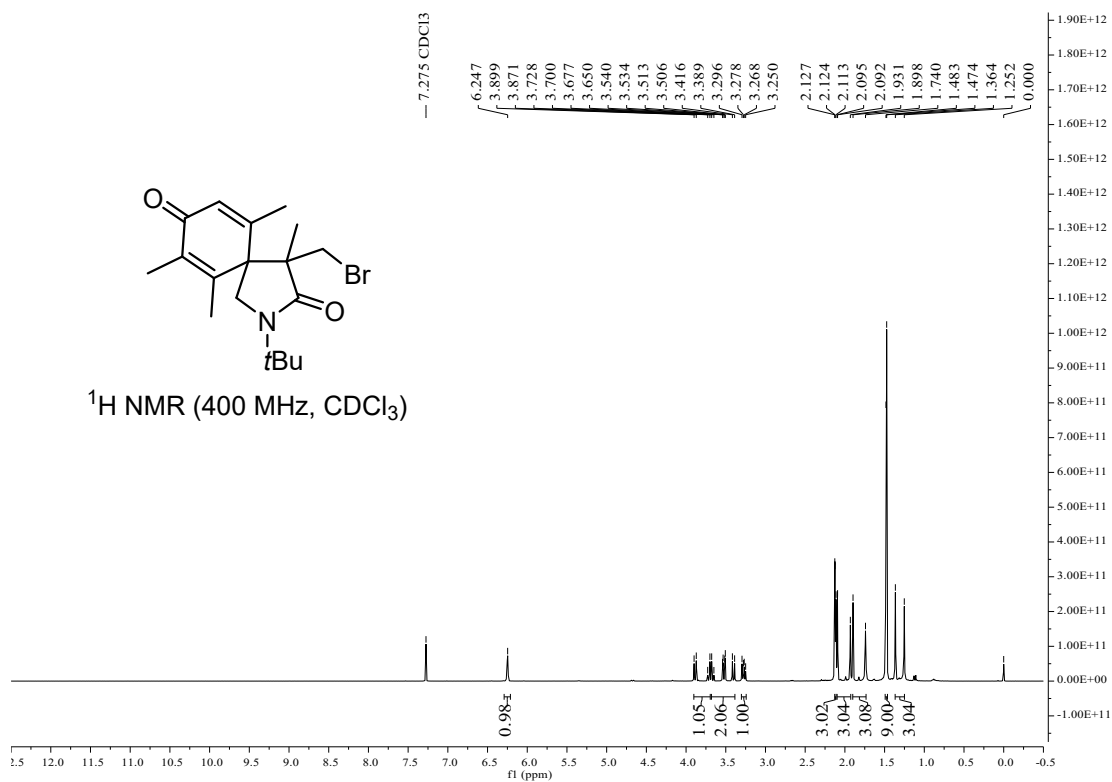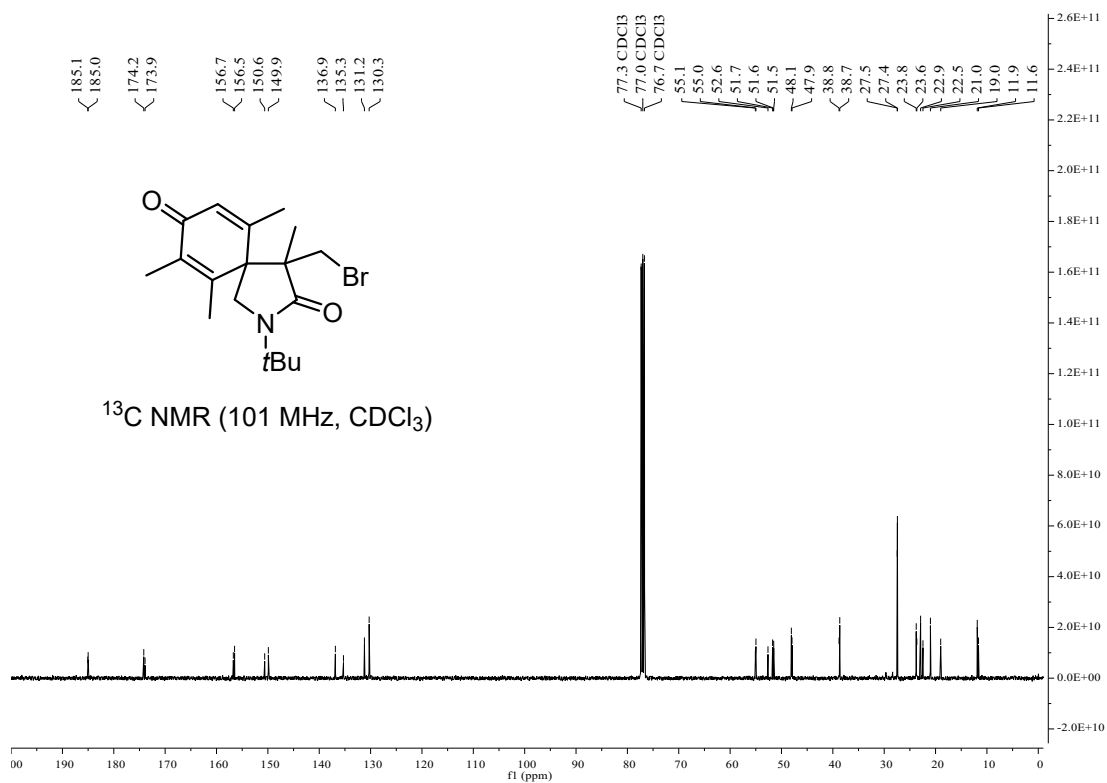

# Compound 30

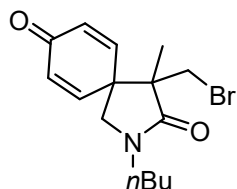

<sup>1</sup>H NMR (400 MHz, CDCl<sub>3</sub>)

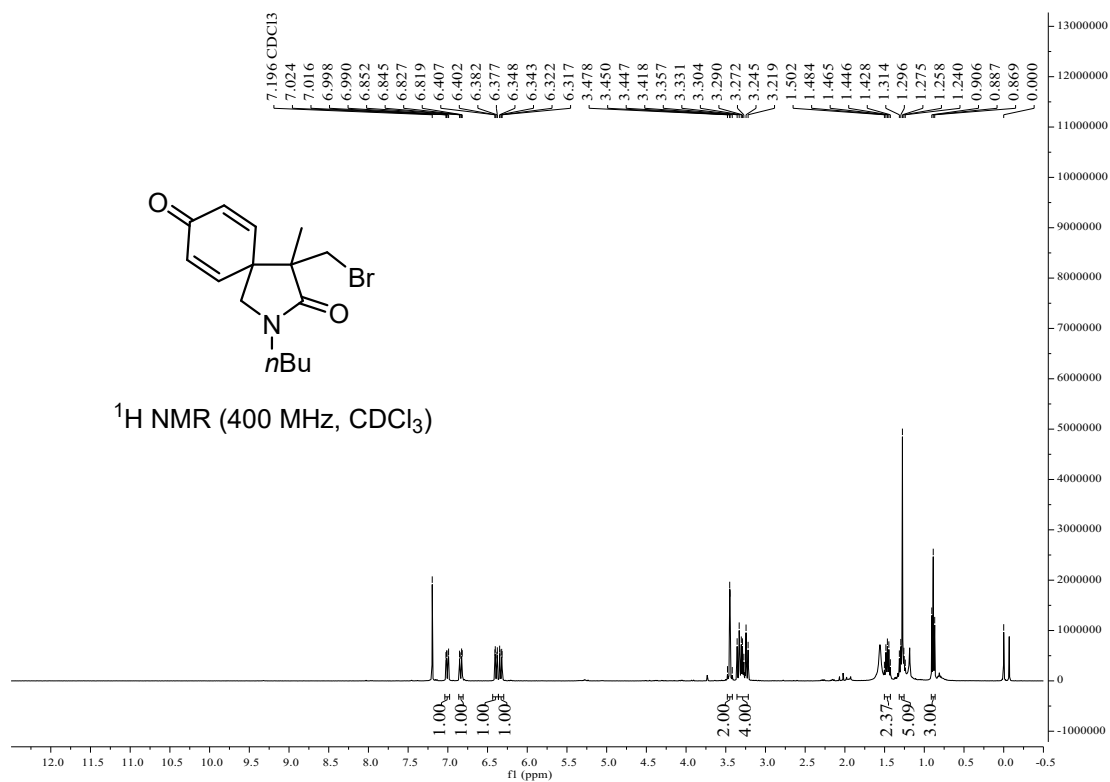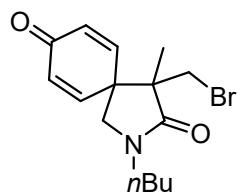

<sup>13</sup>C NMR (101 MHz, CDCl<sub>3</sub>)

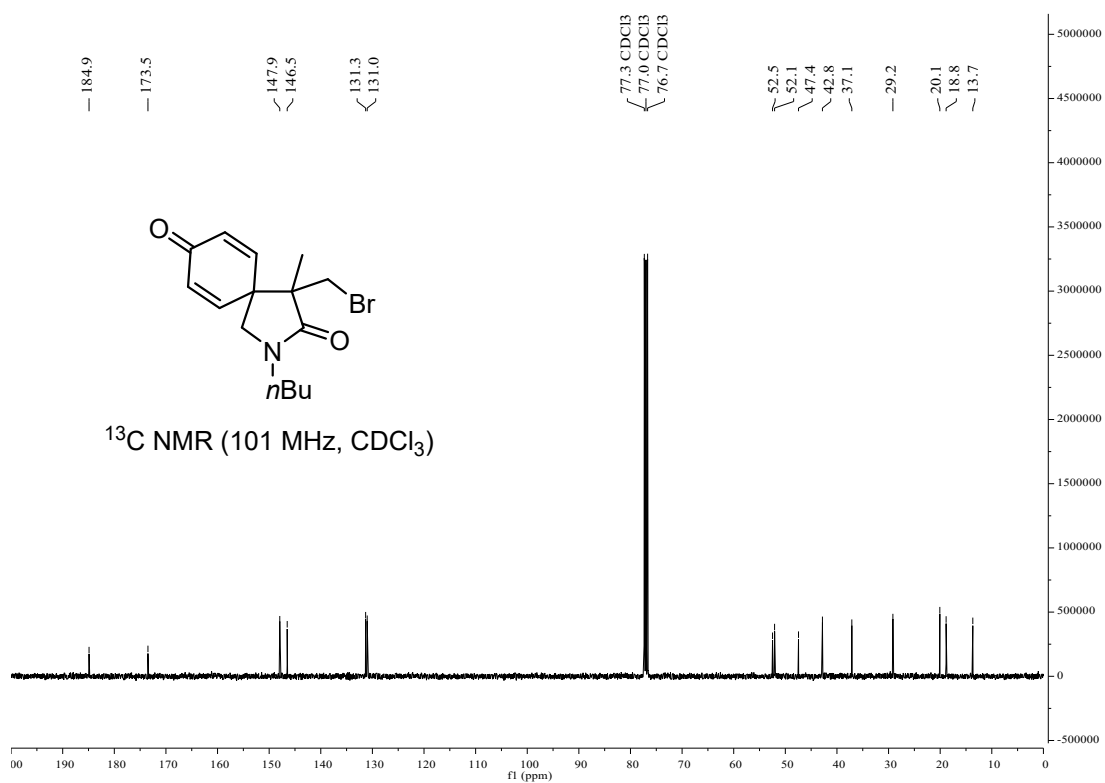

# Compound 31

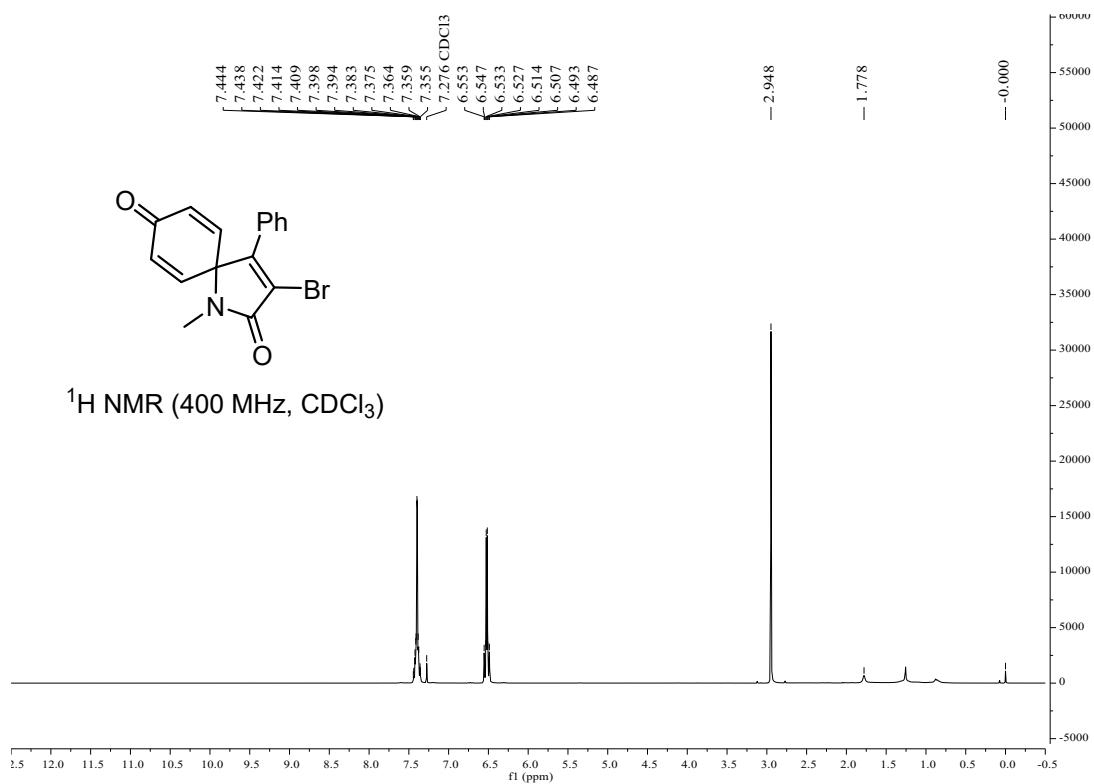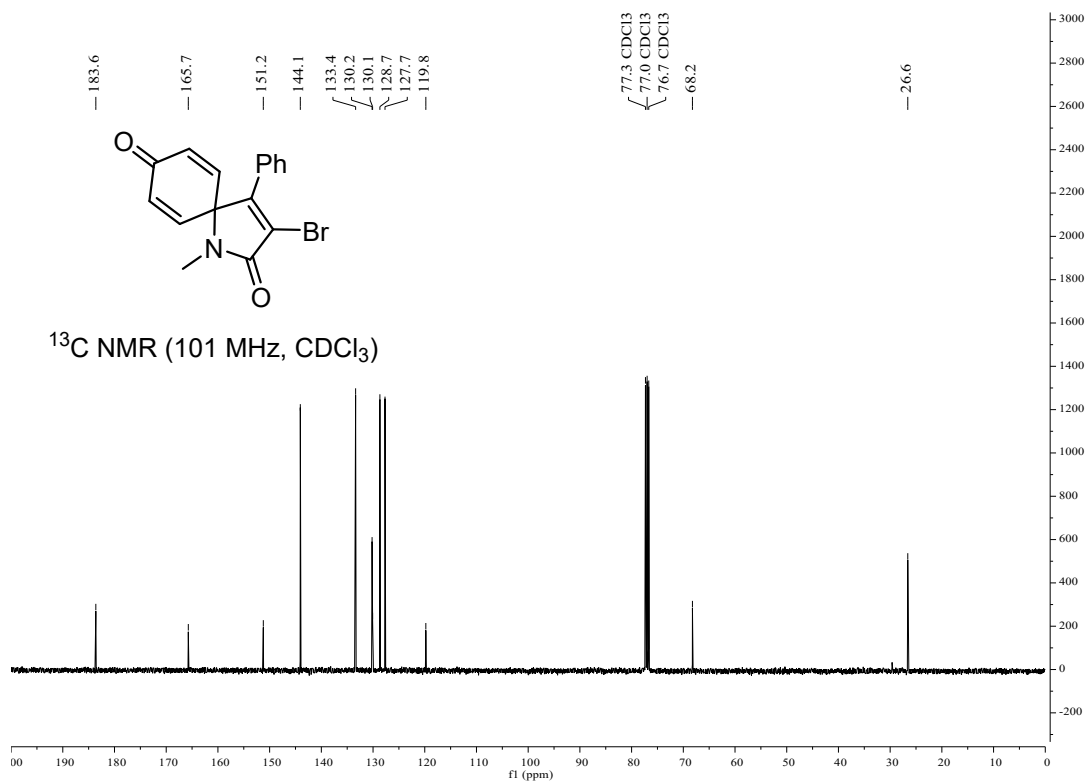

# Compound 32

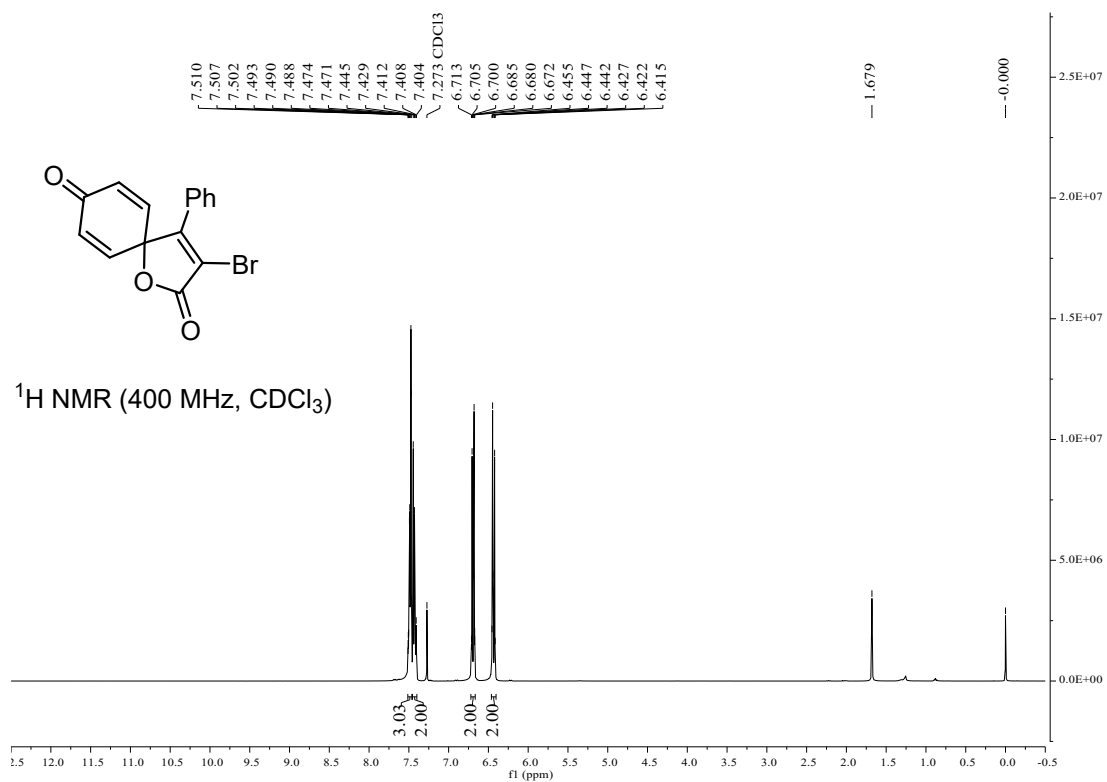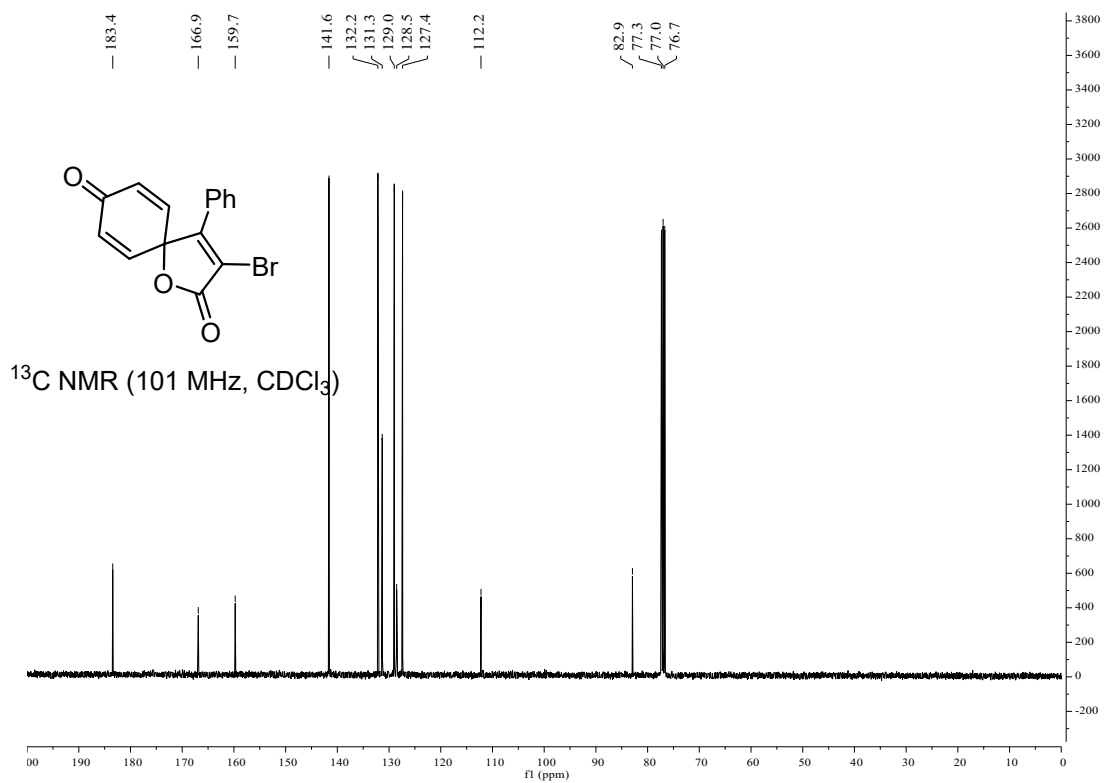

# Compound 33

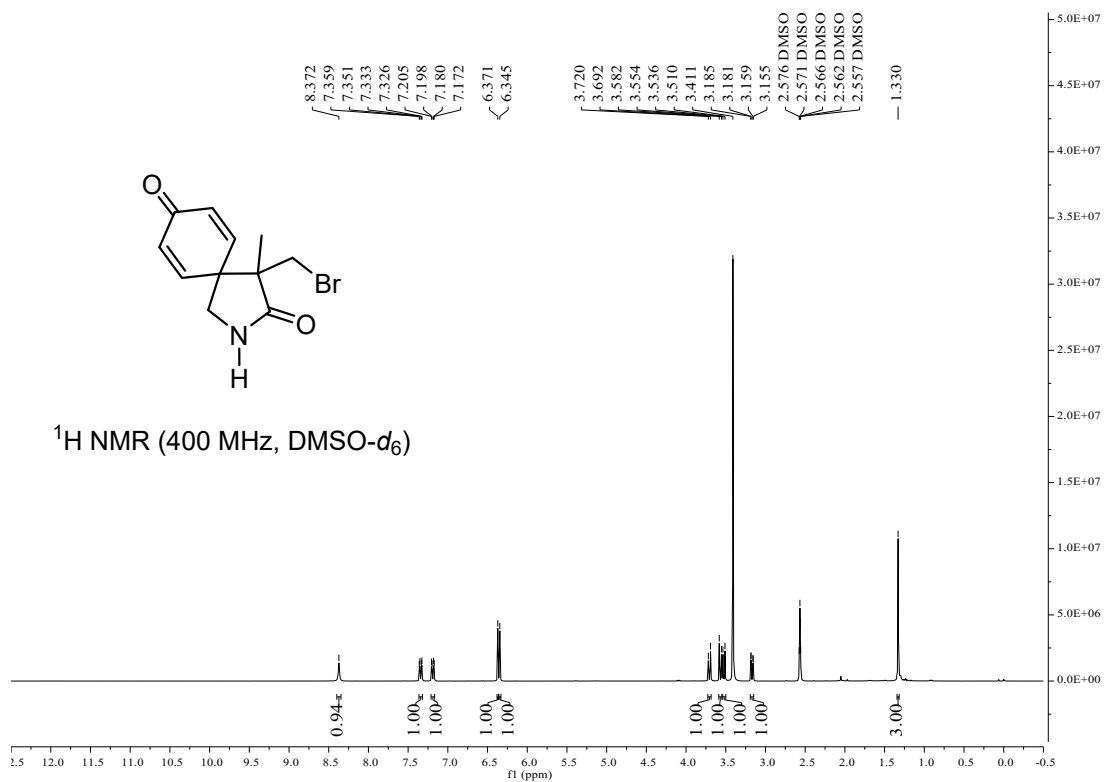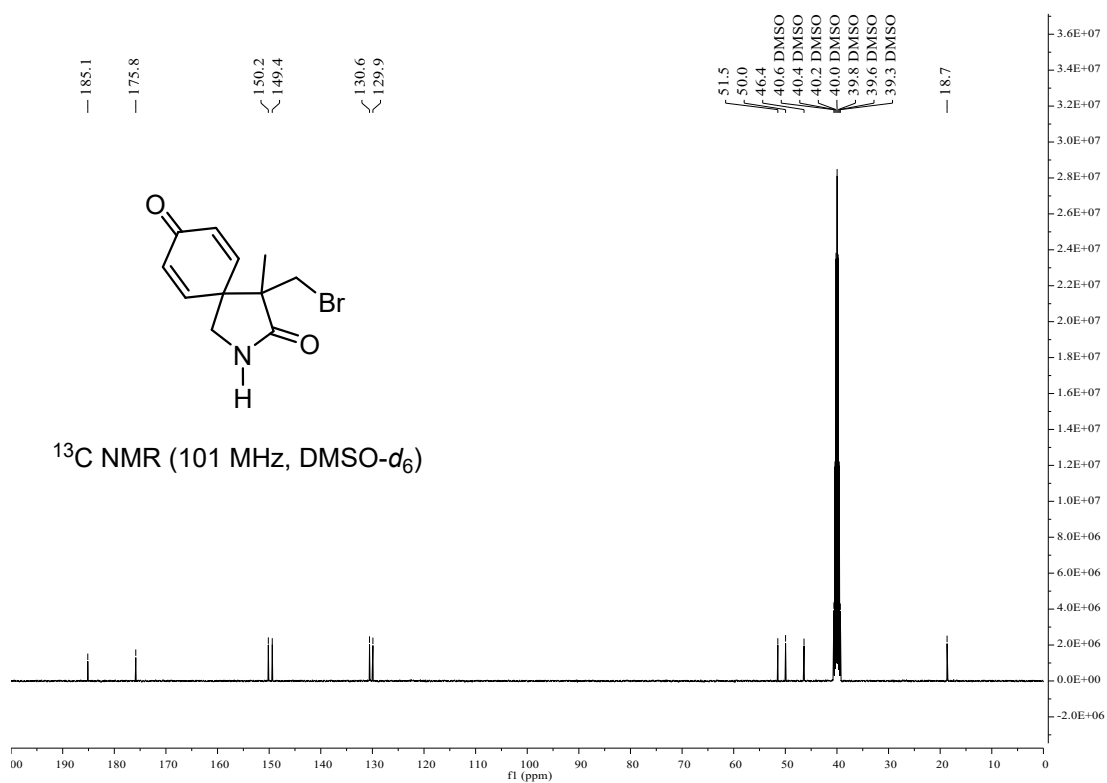

# Compound 34

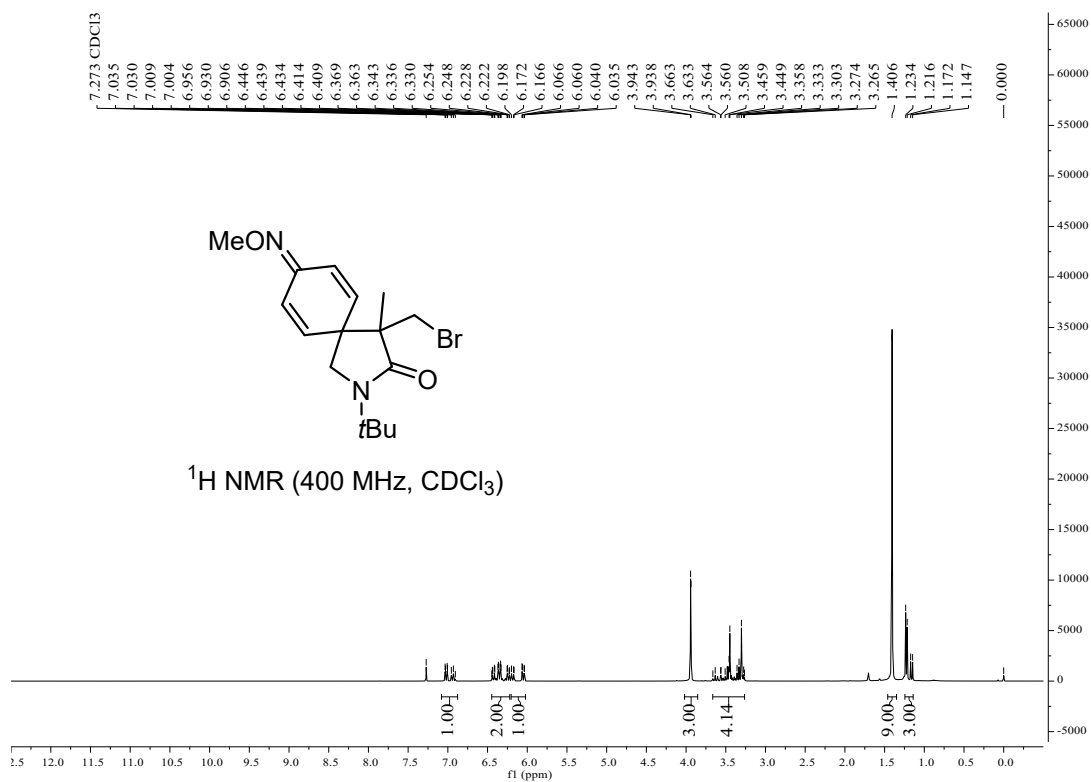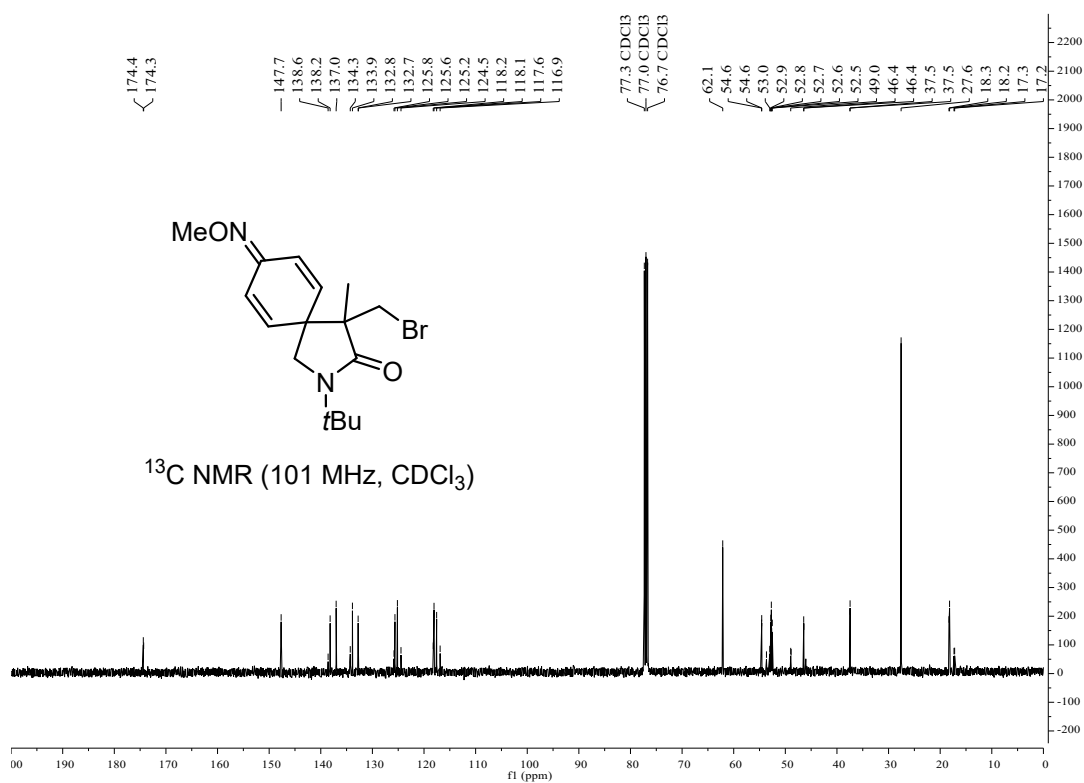

# Compound 36

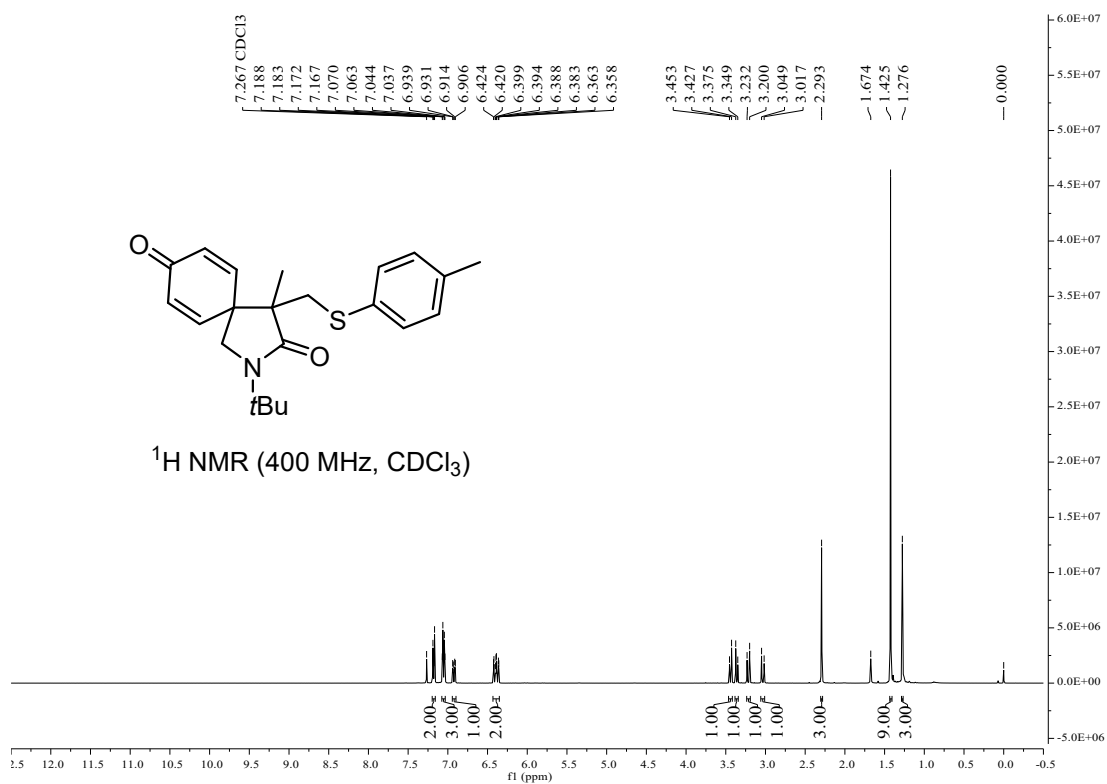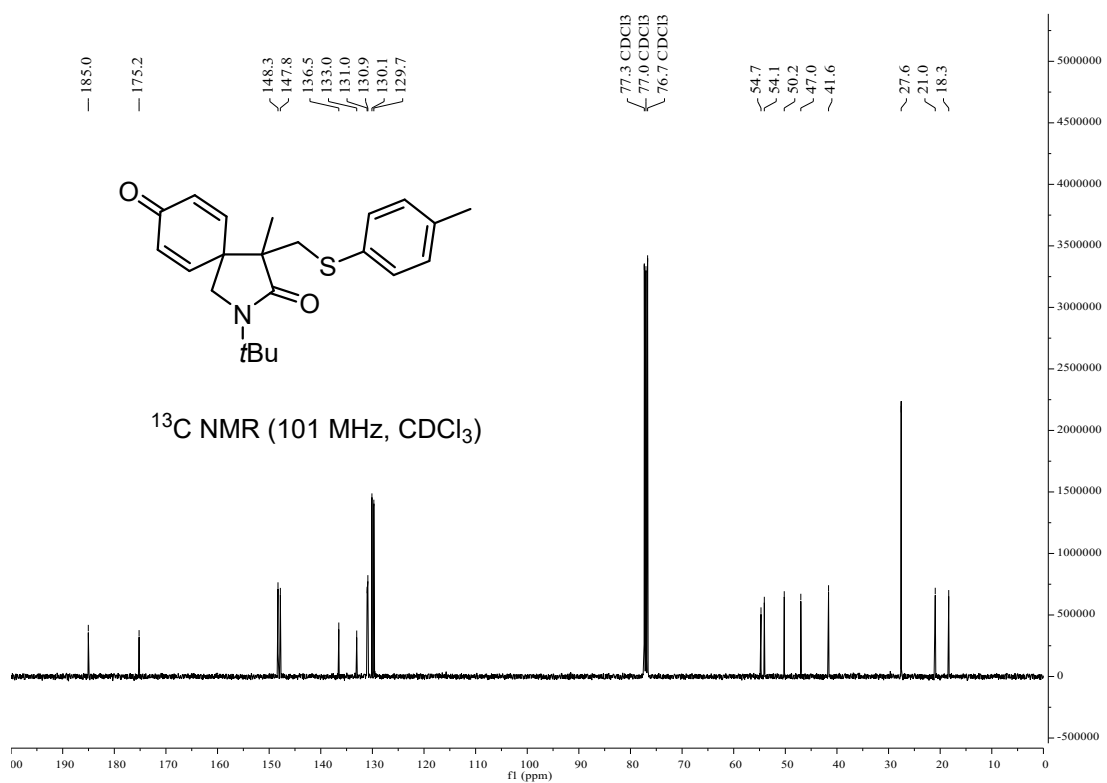



# Compound 37

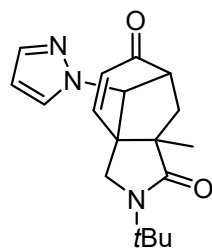

<sup>1</sup>H NMR (400 MHz, CDCl<sub>3</sub>)

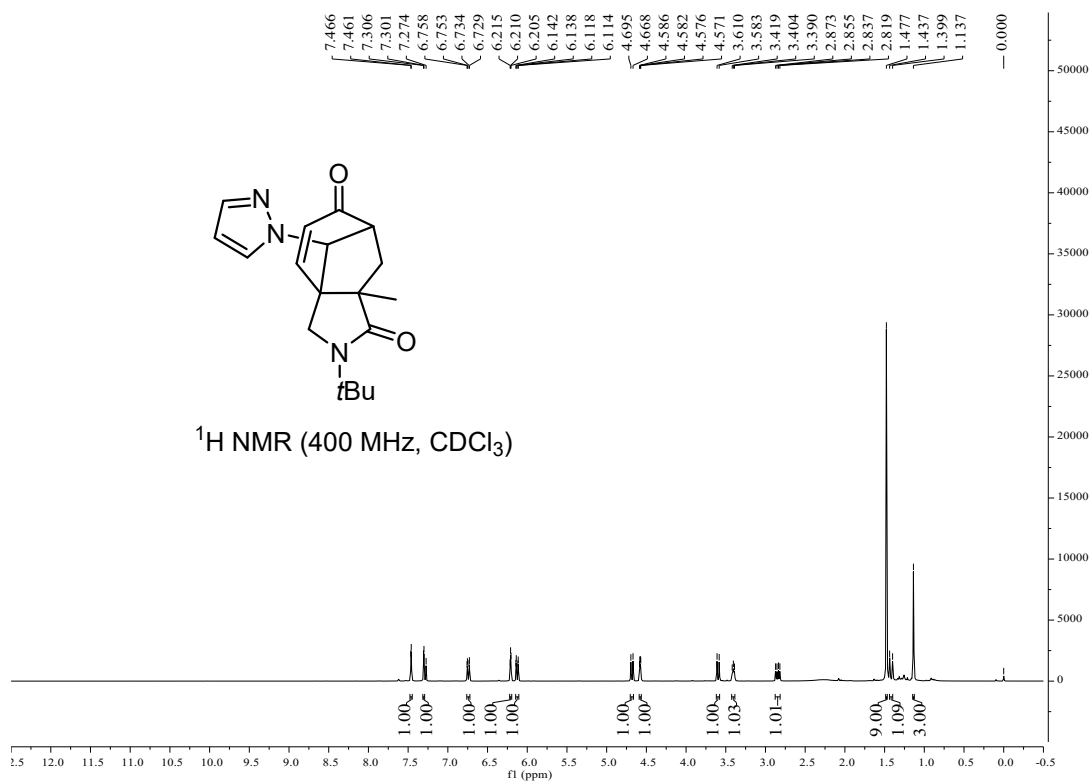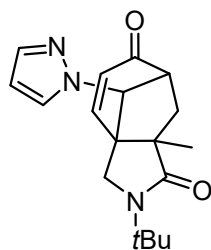

<sup>13</sup>C NMR (101 MHz, CDCl<sub>3</sub>)

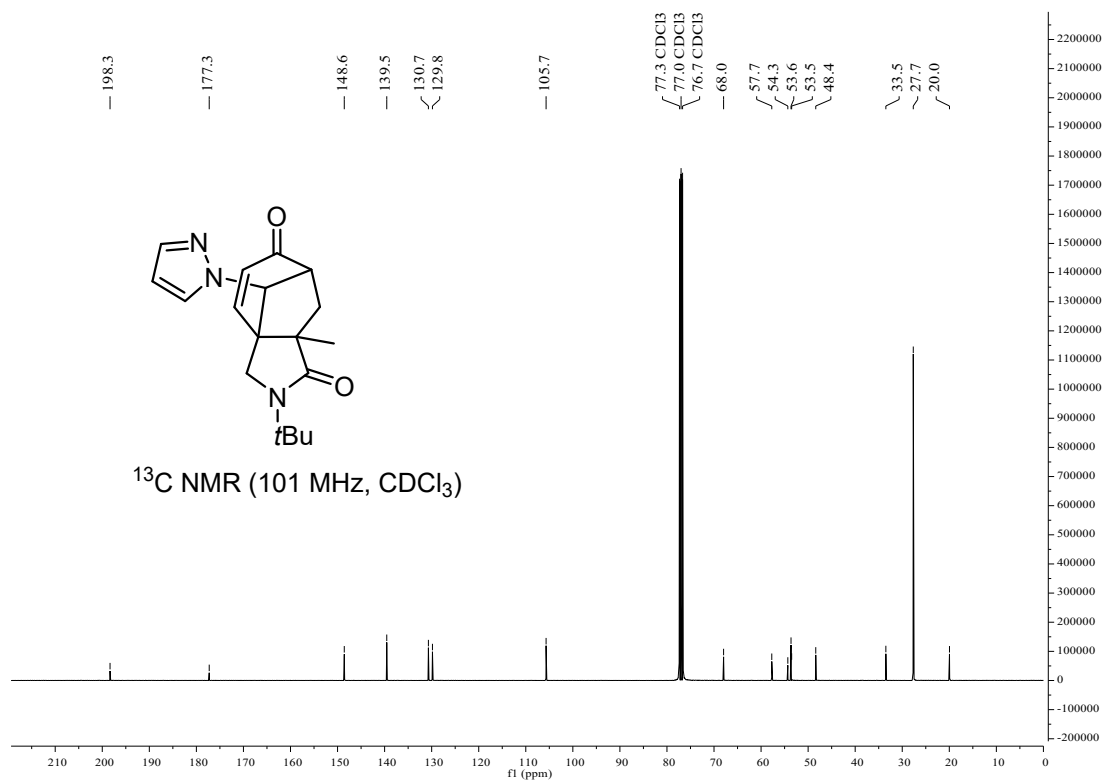

# Compound 38

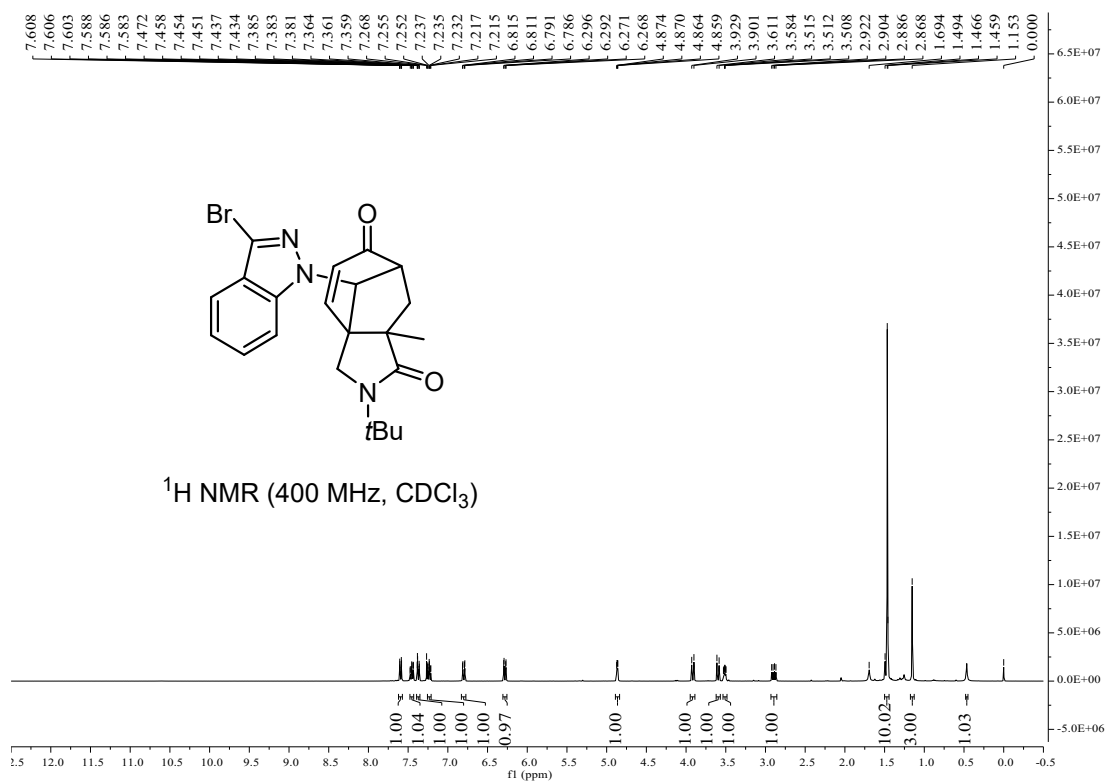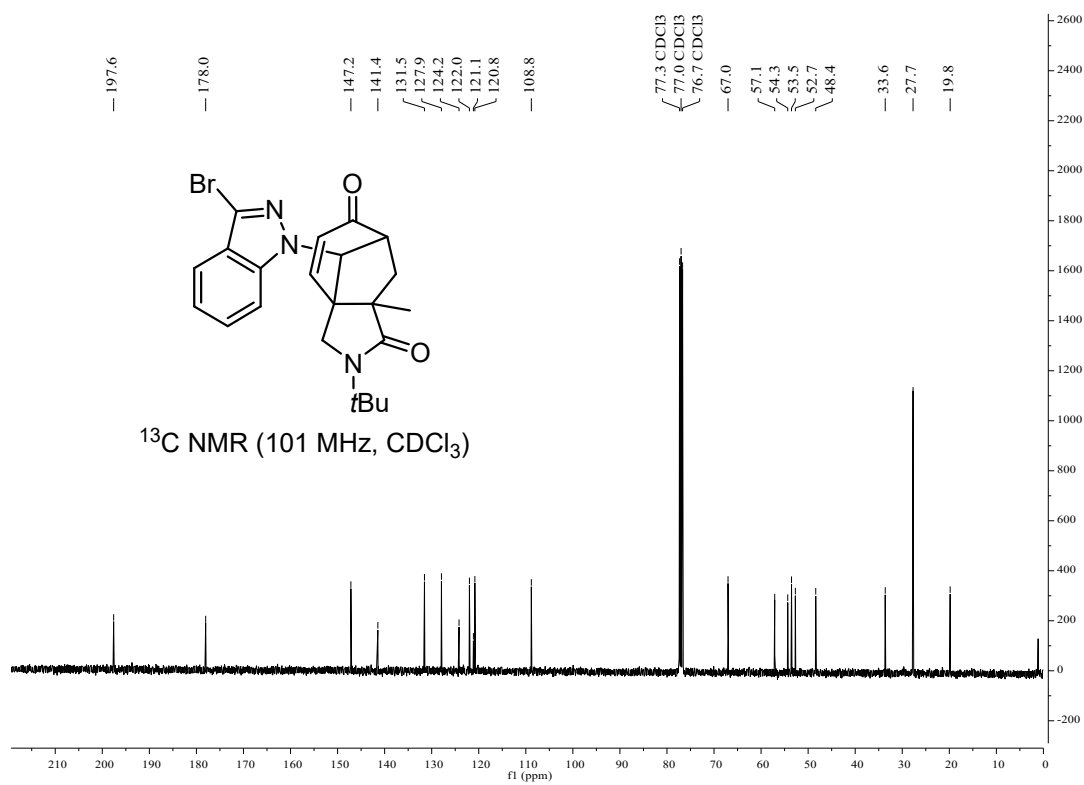

# Compound 39

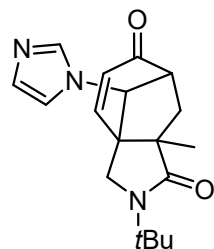

<sup>1</sup>H NMR (400 MHz, CDCl<sub>3</sub>)

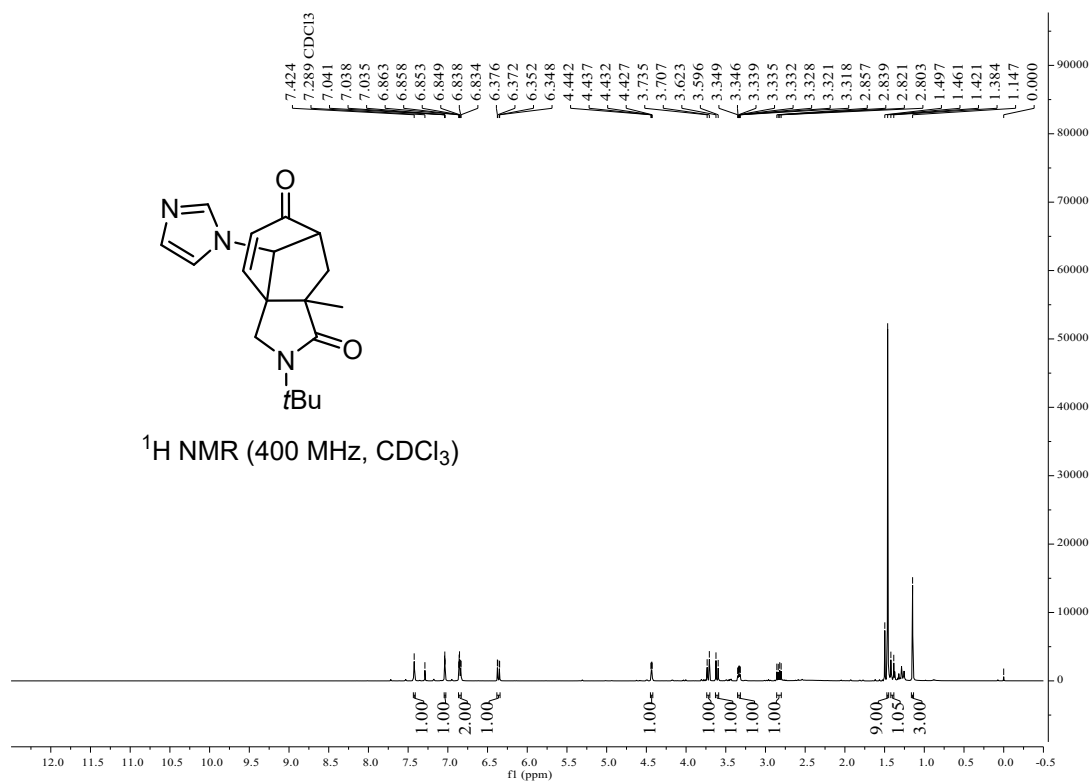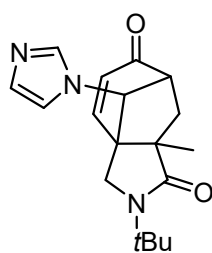

<sup>13</sup>C NMR (101 MHz, CDCl<sub>3</sub>)

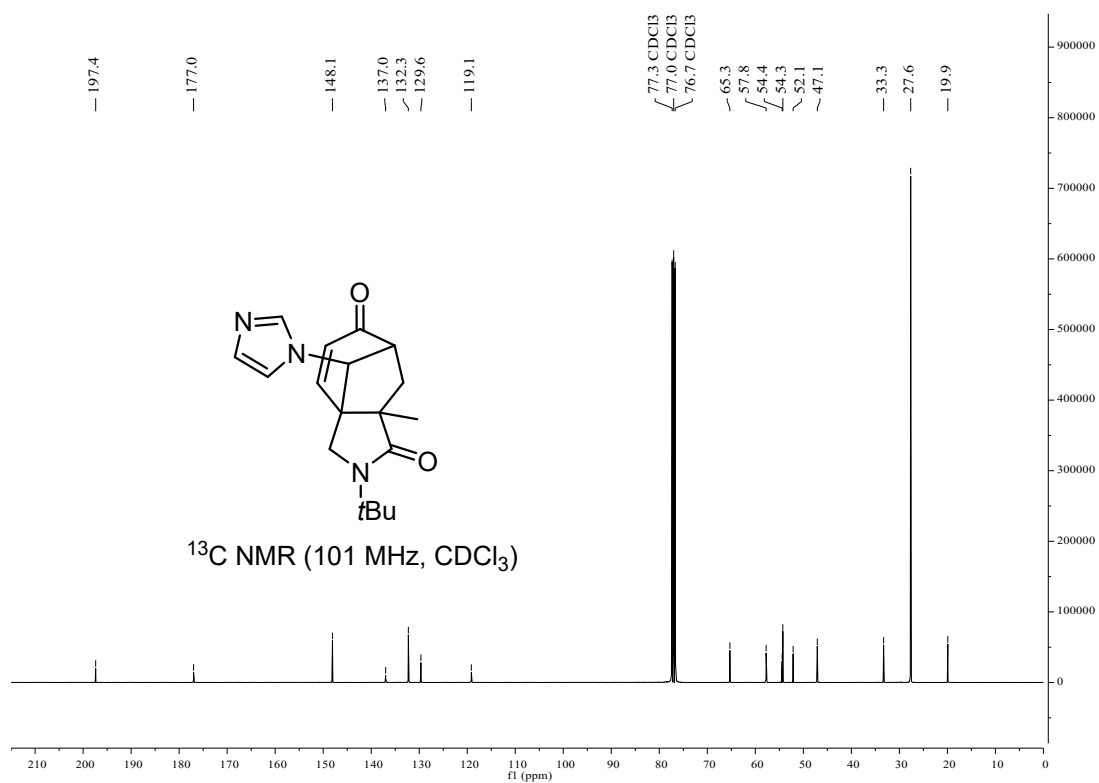

# Compound 40

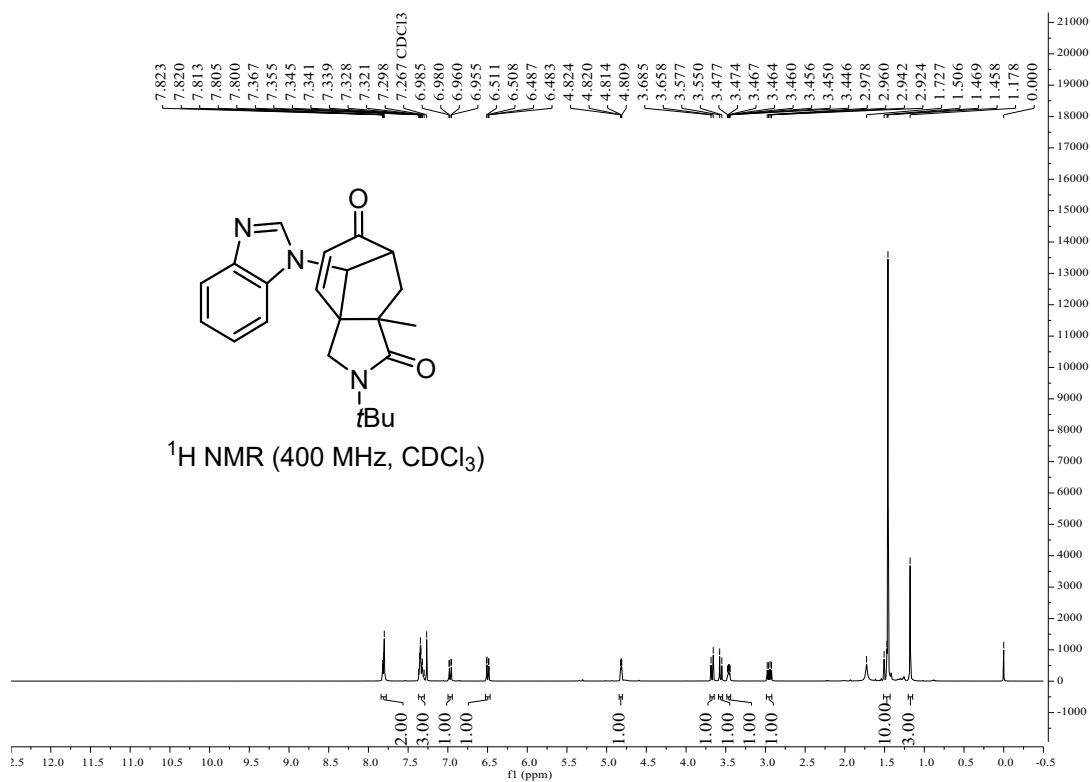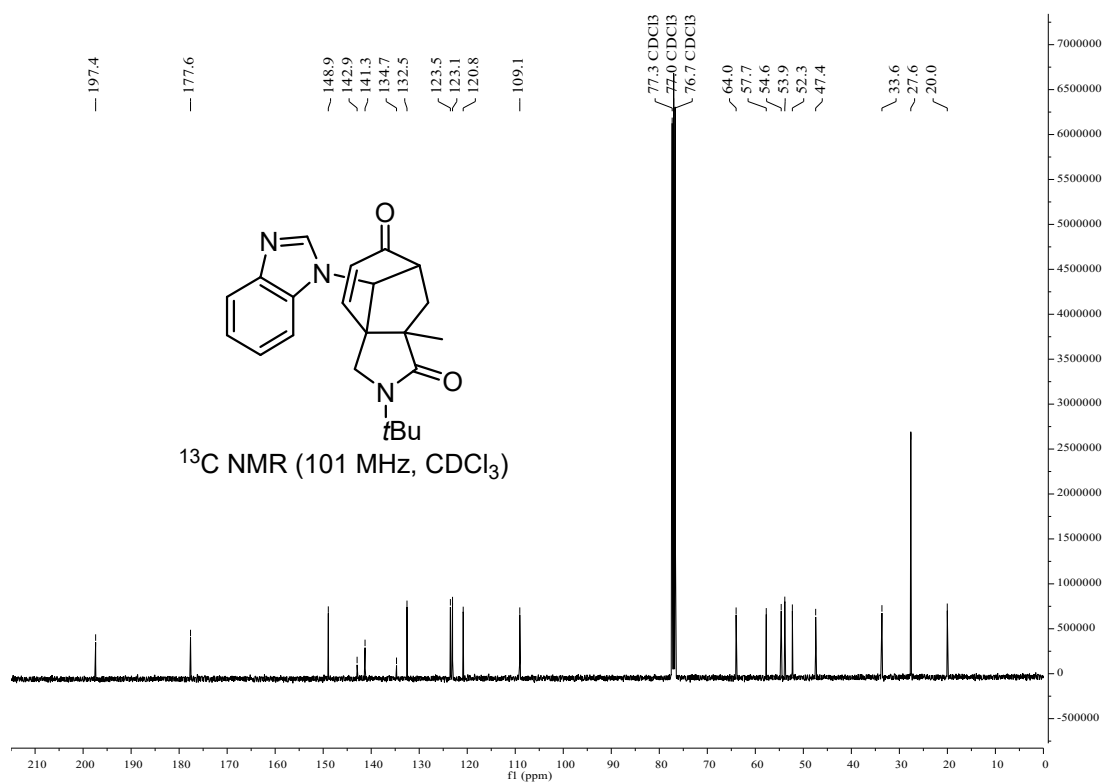

# Compound 41

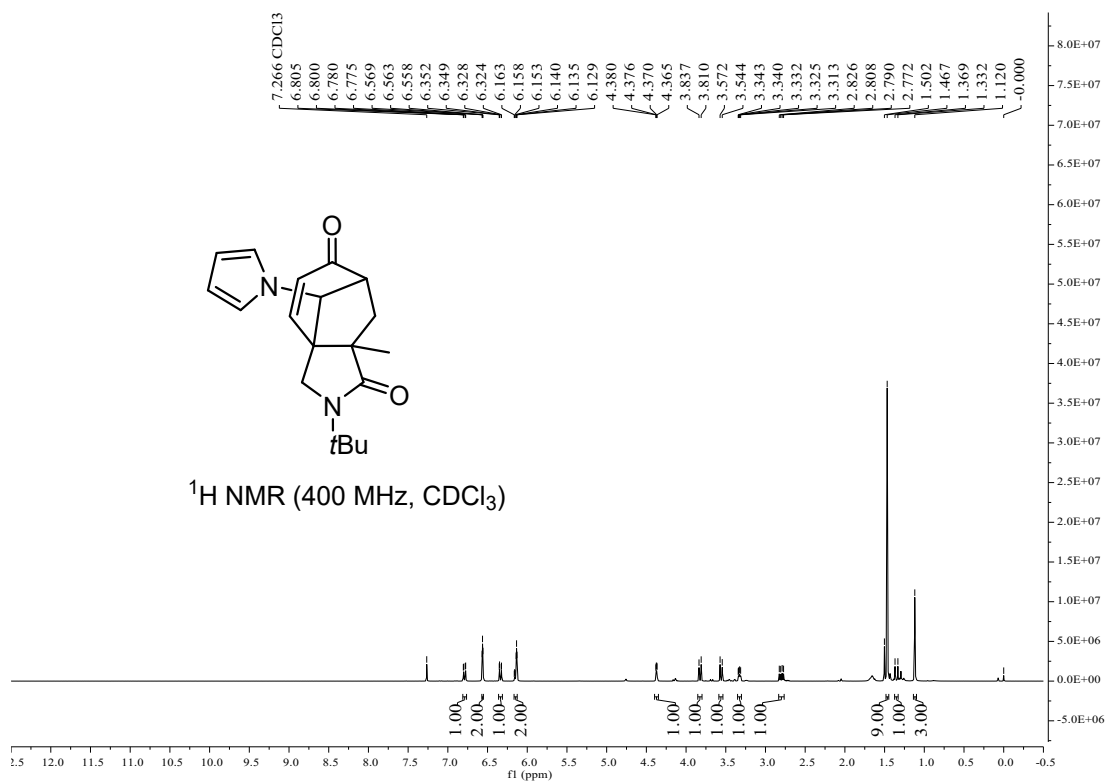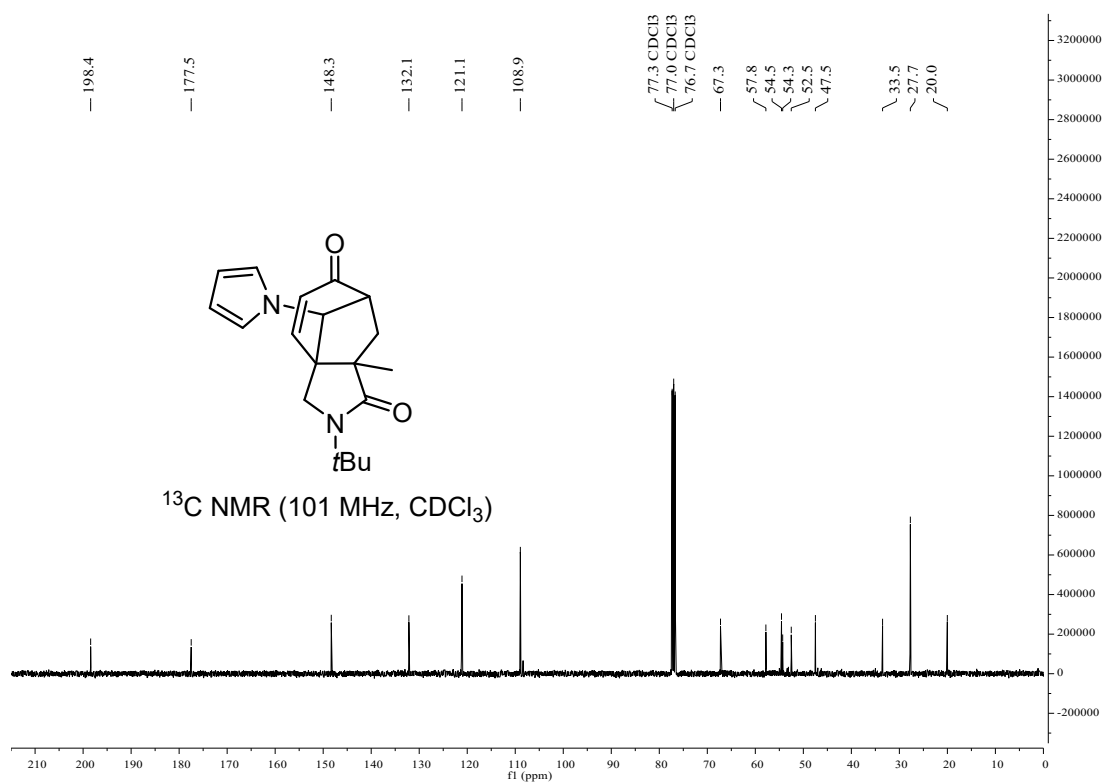

# Compound 42

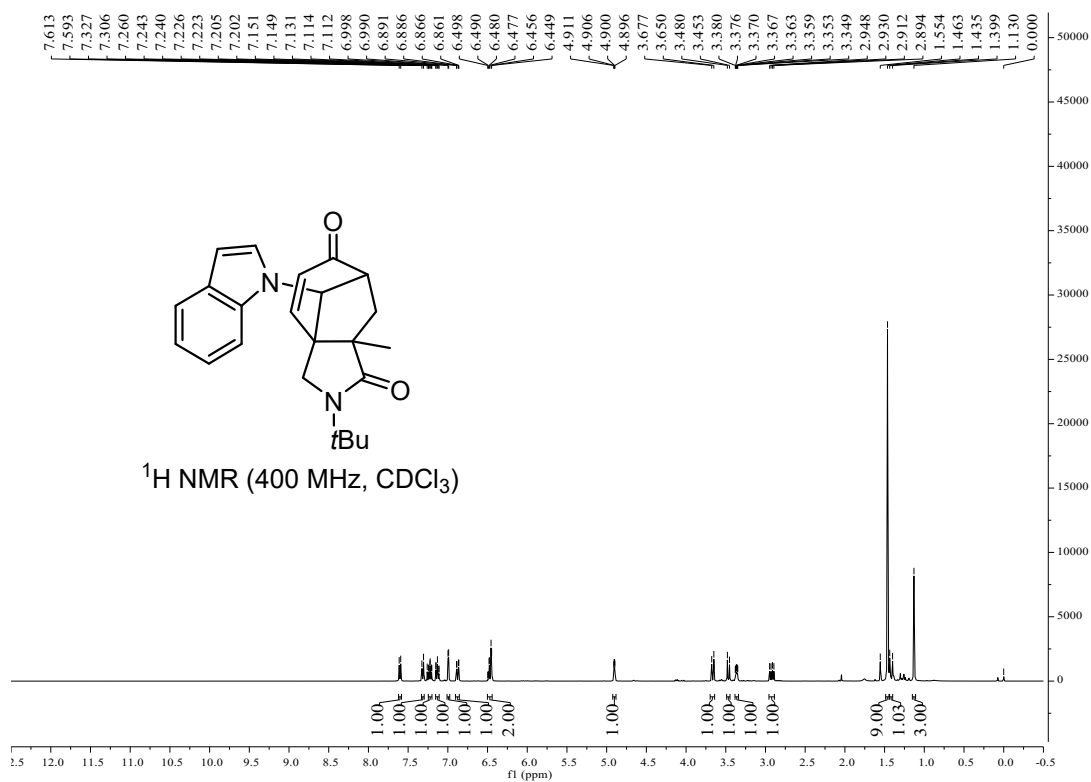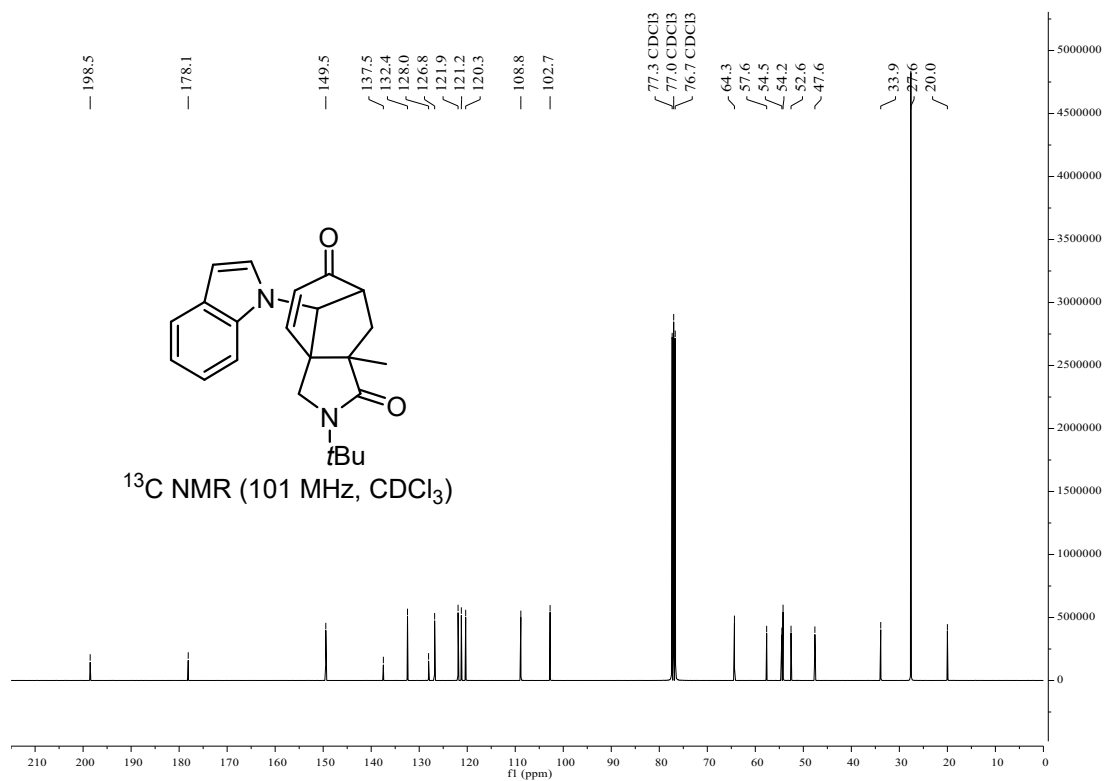

# Compound 43

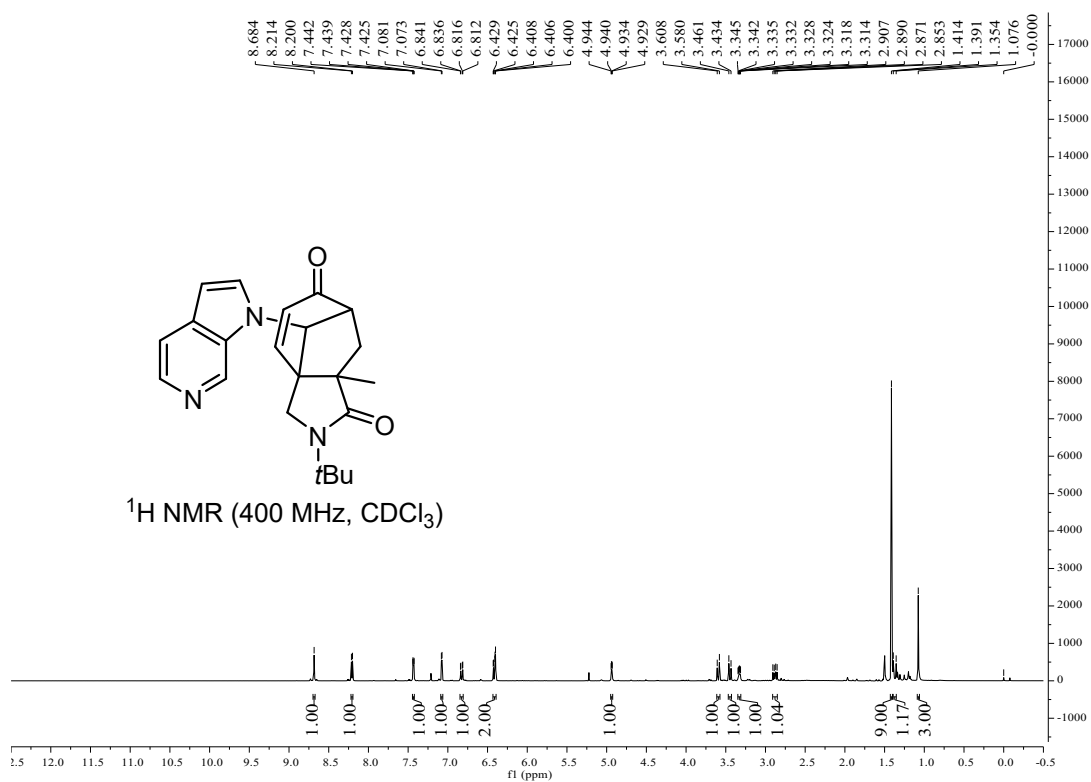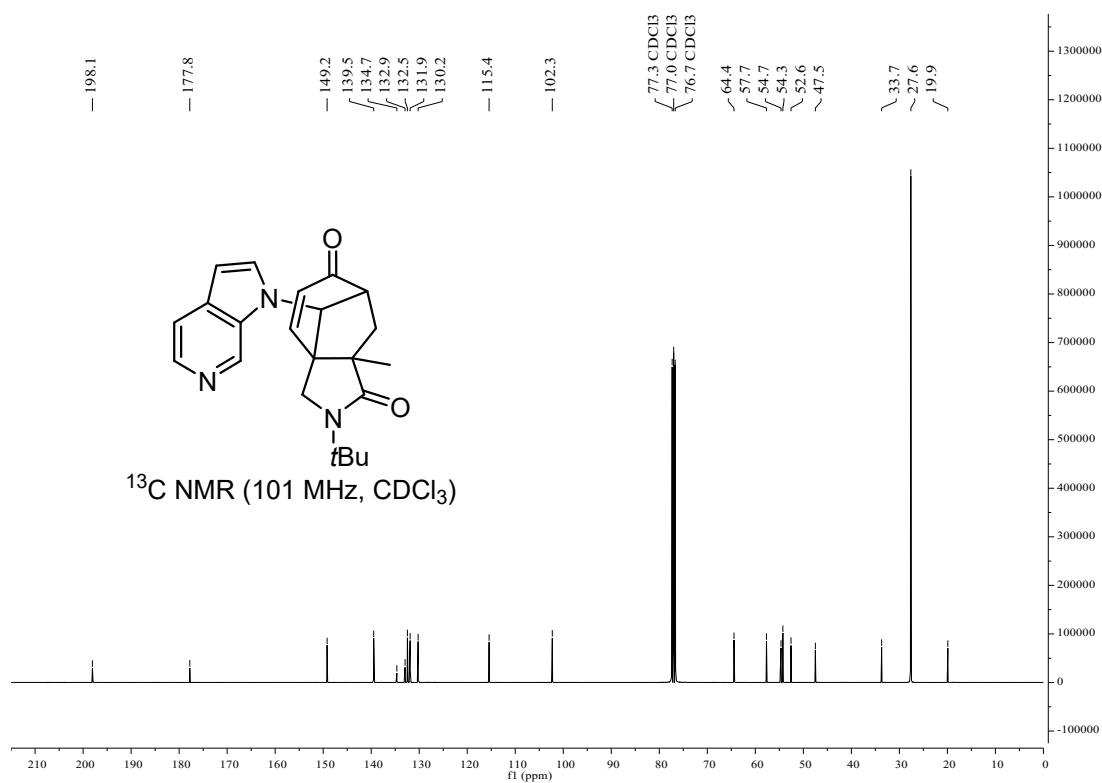

# Compound 44

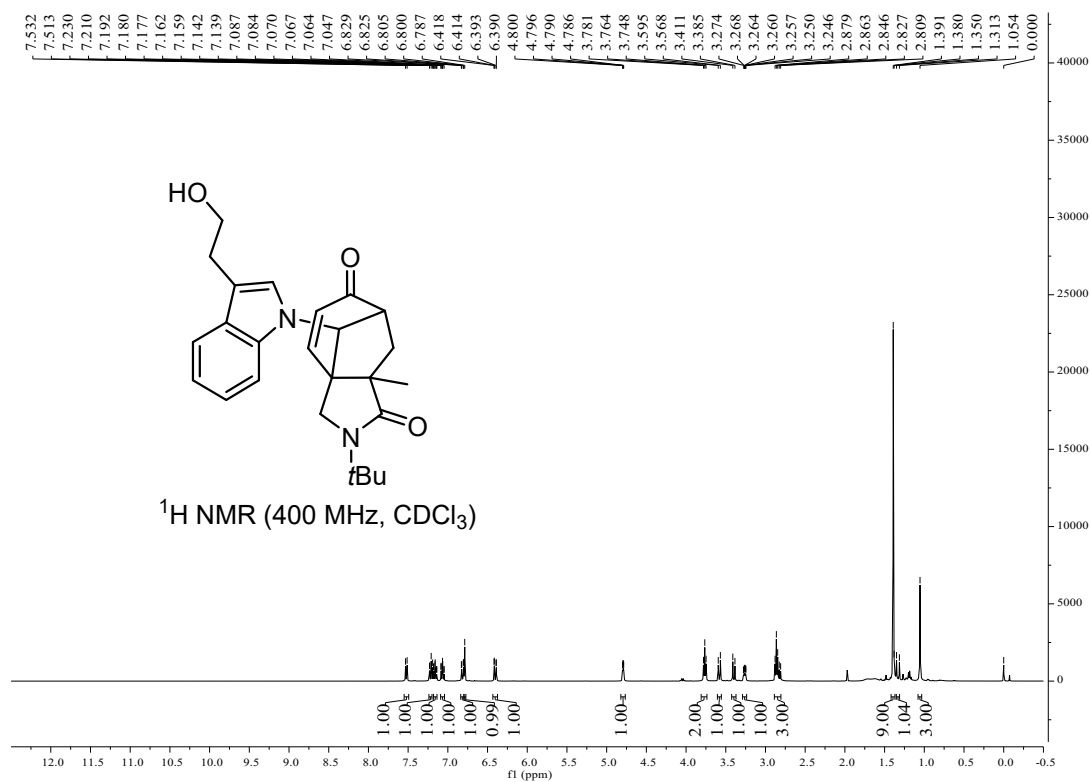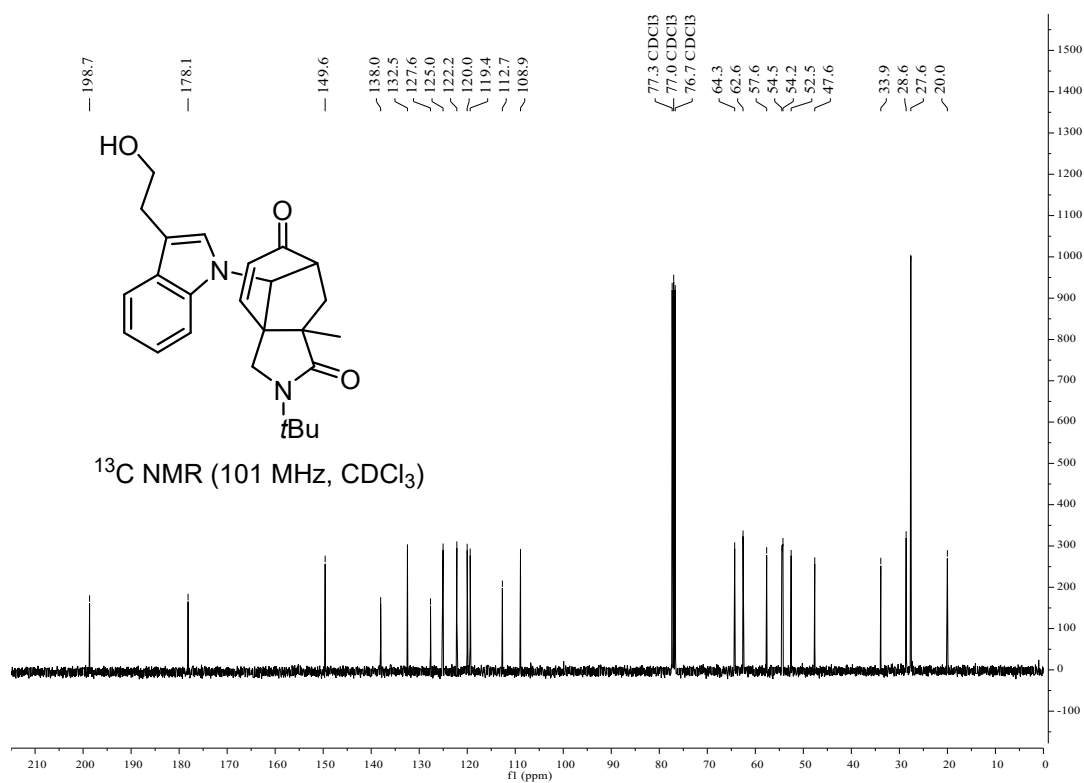



# Compound 45

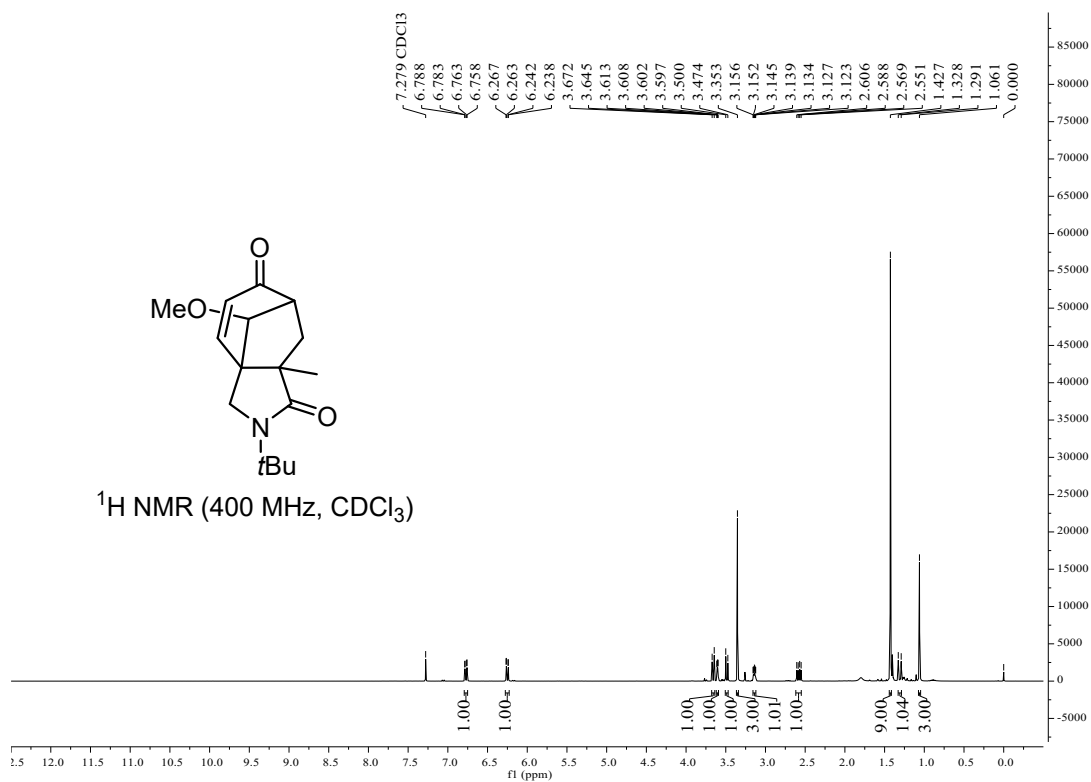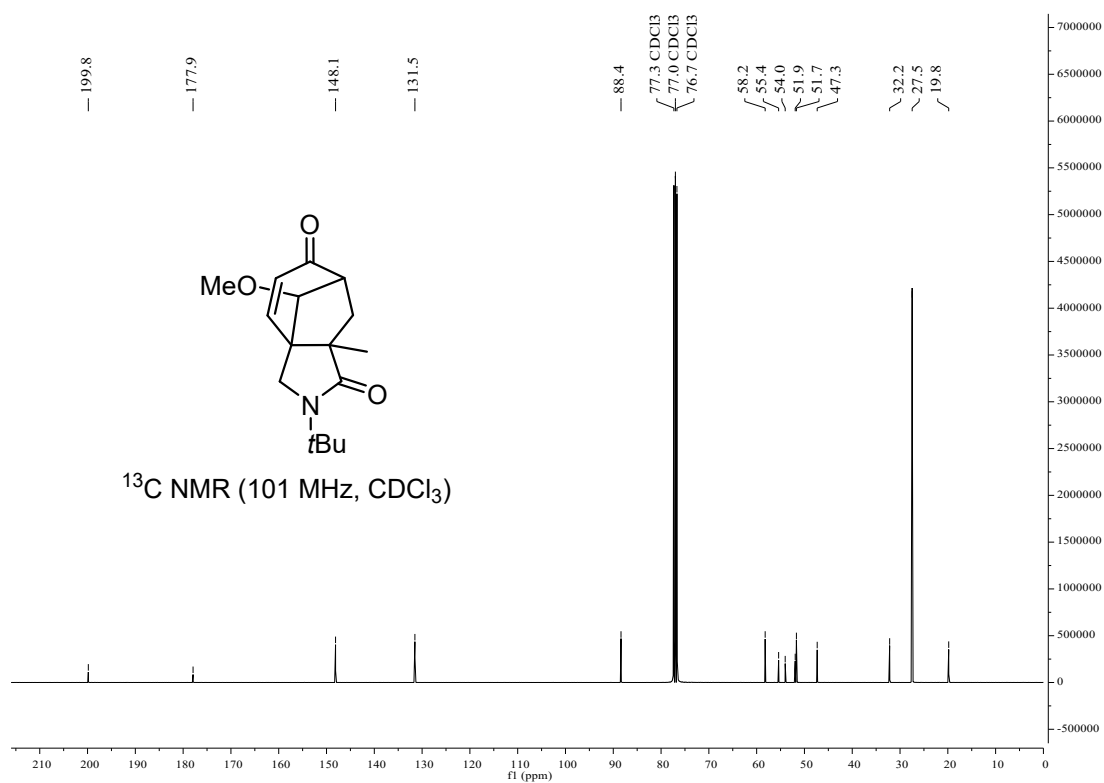

# Compound 46

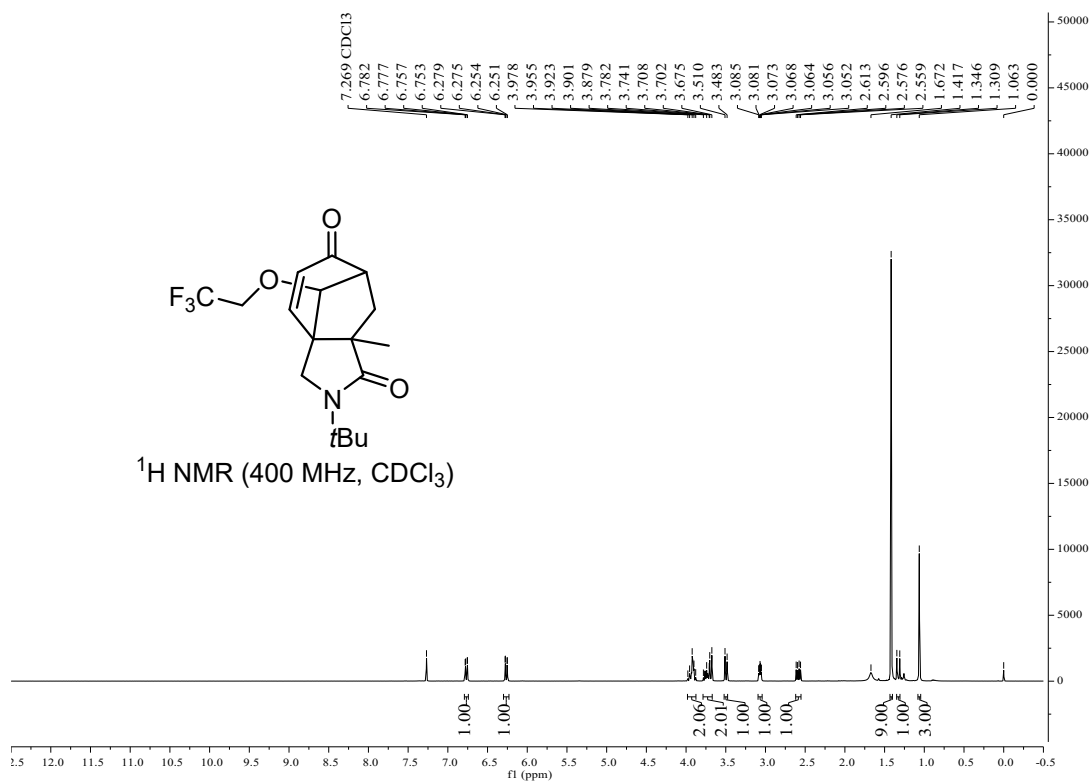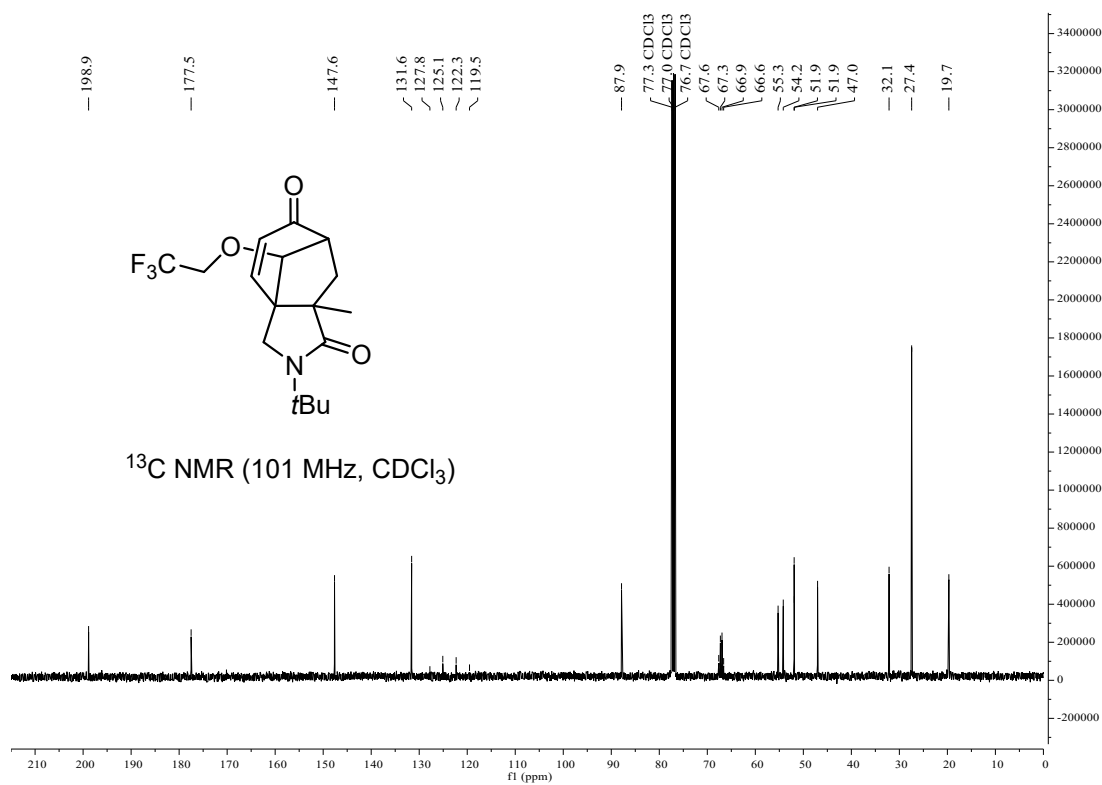

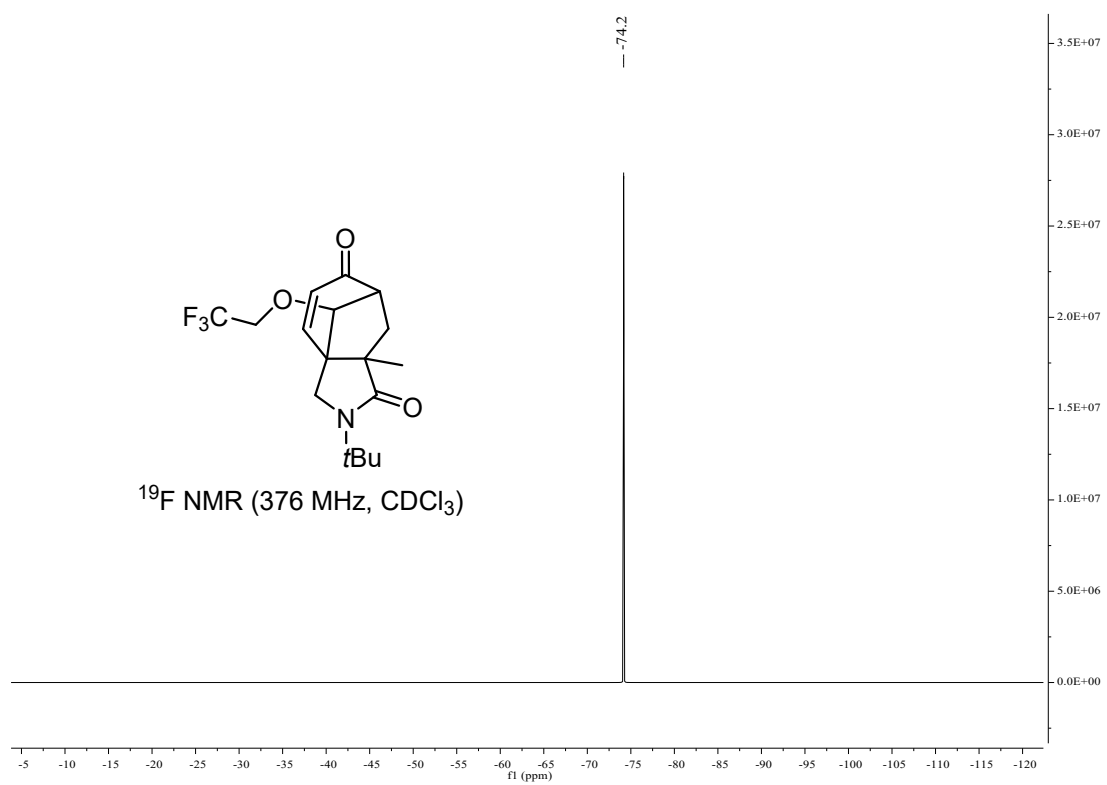



# Compound 48

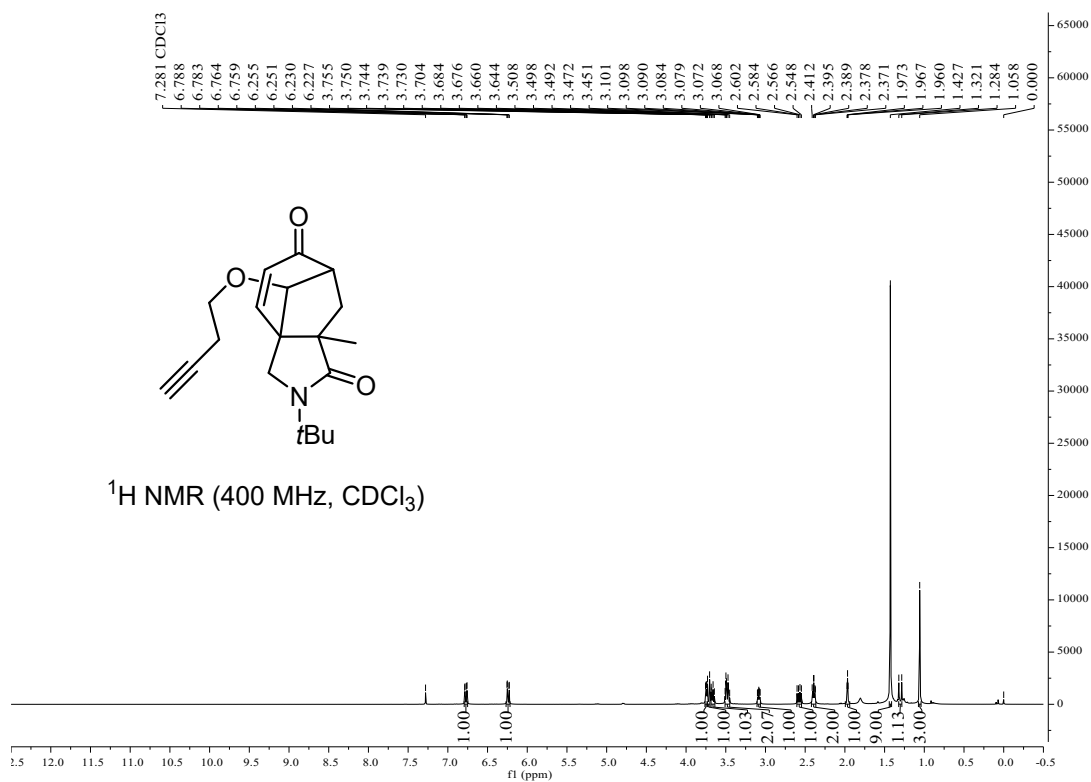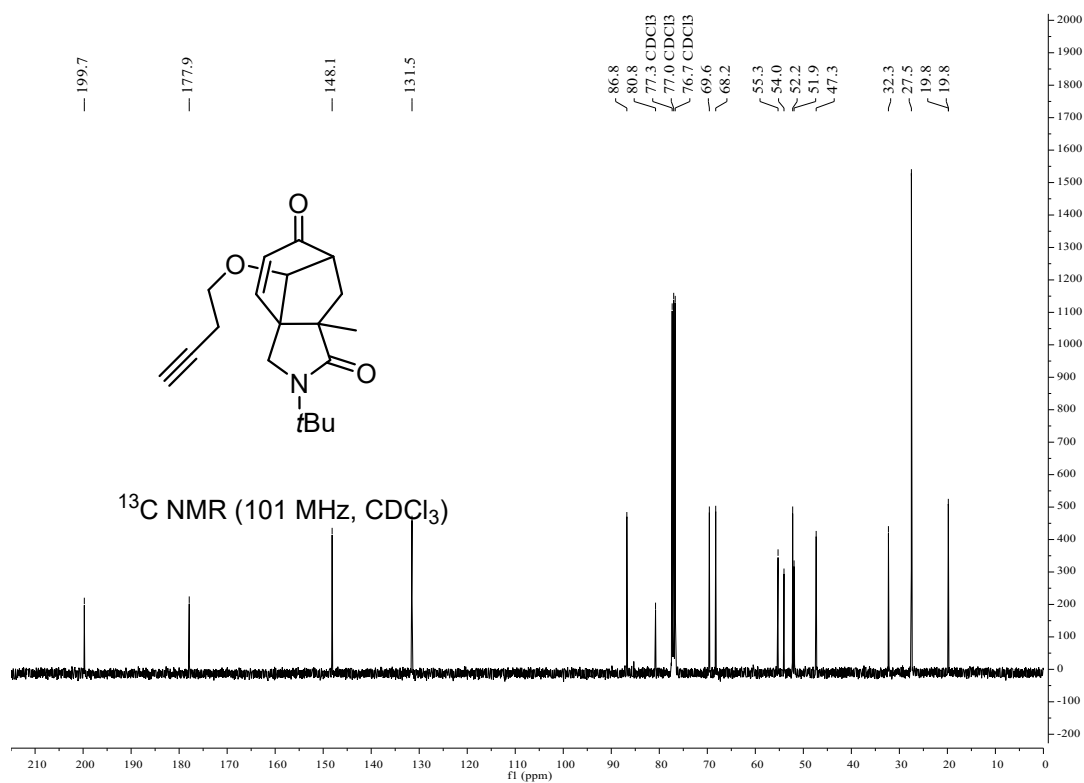

# Compound 49

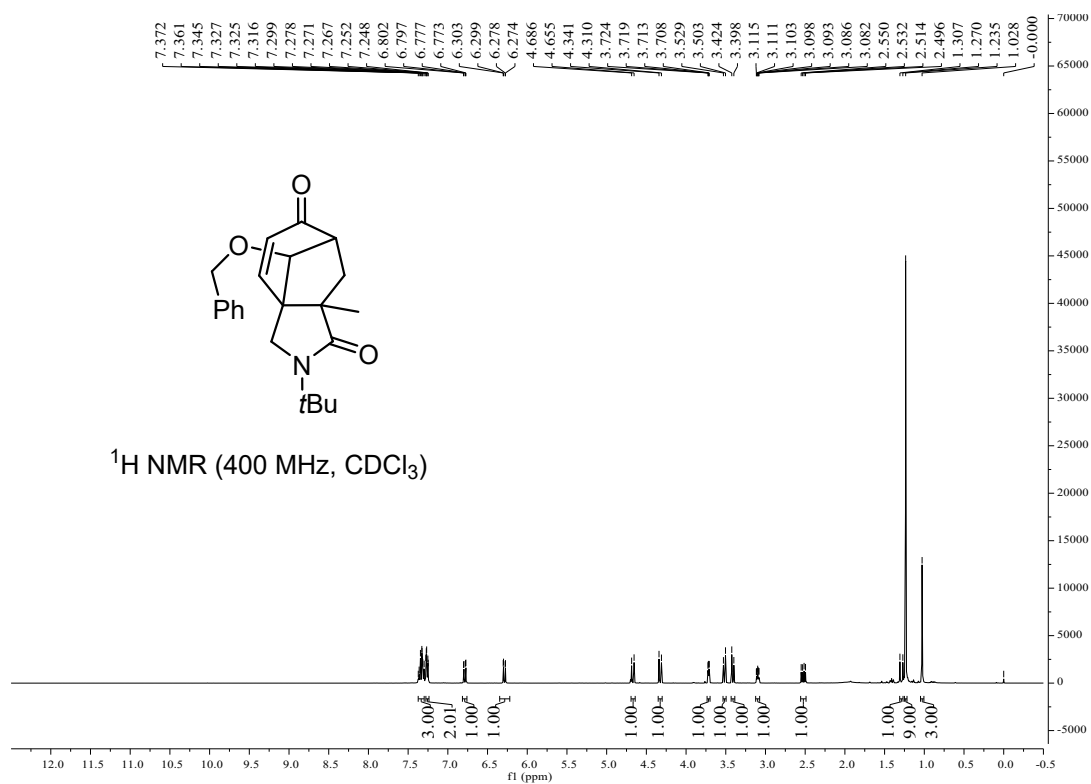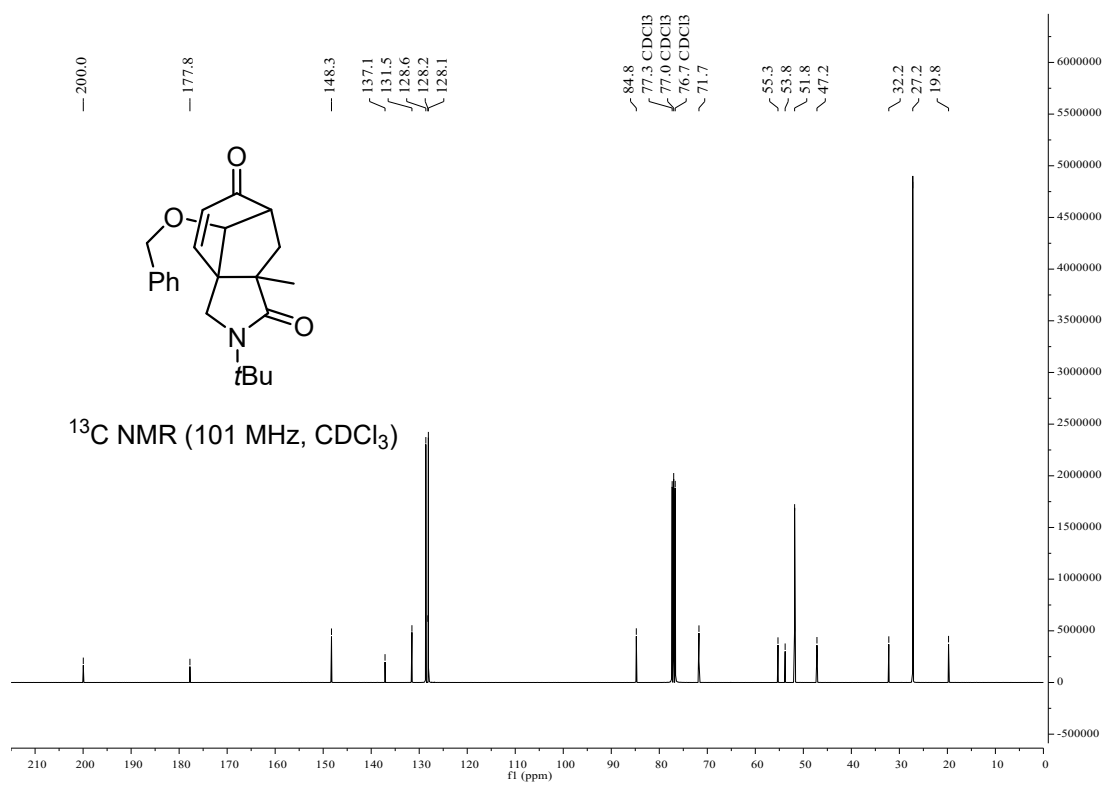

# Compound 50

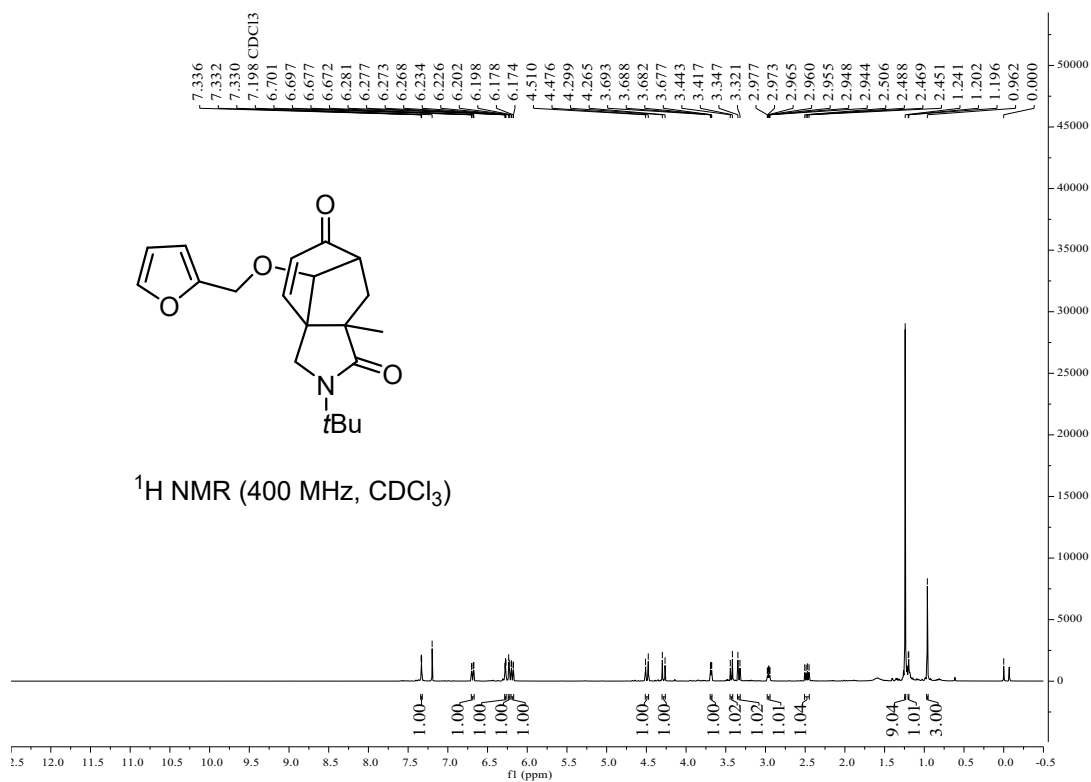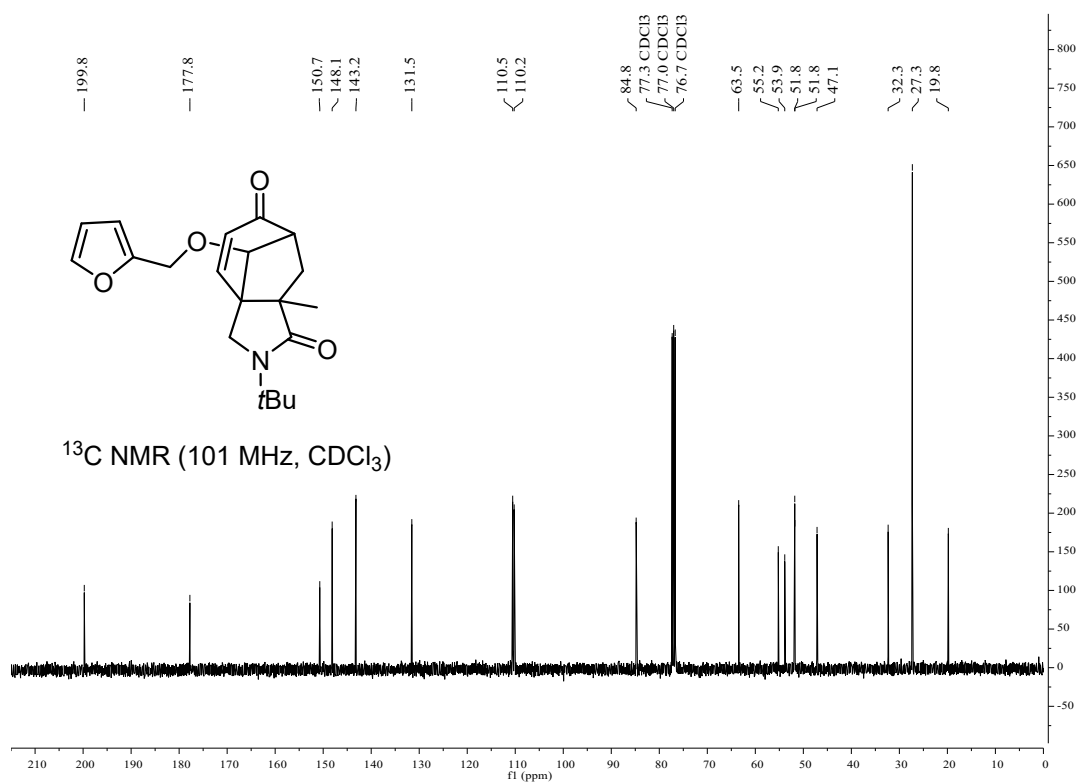

# Compound 51

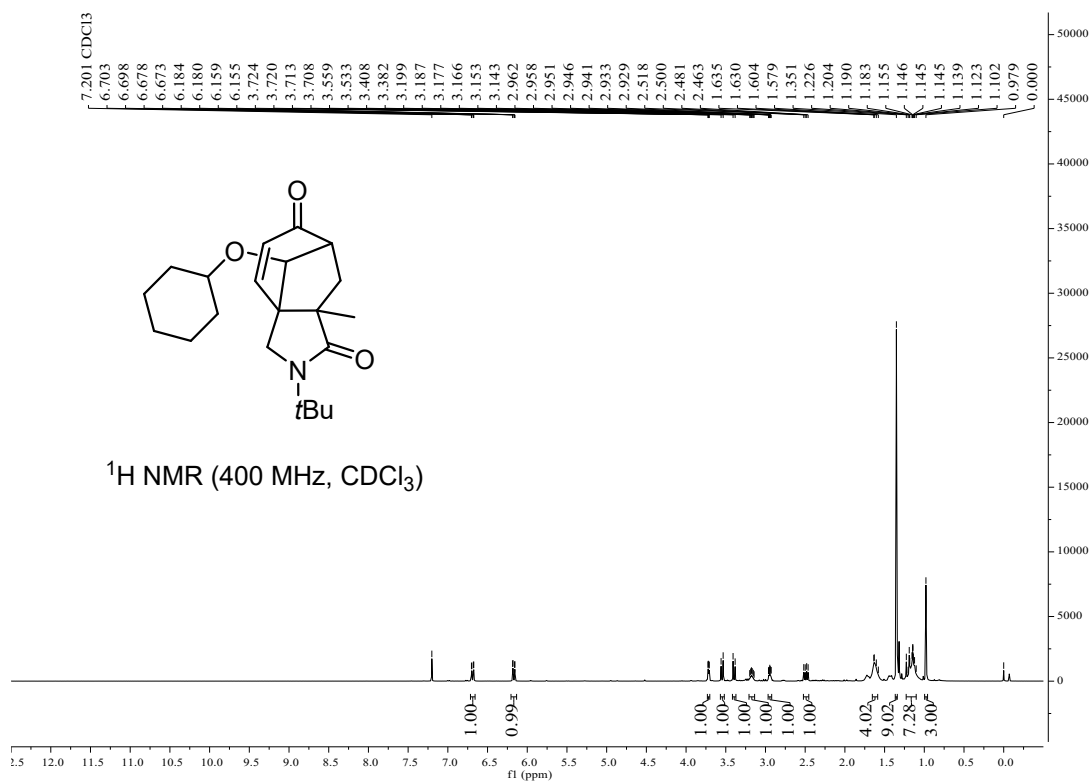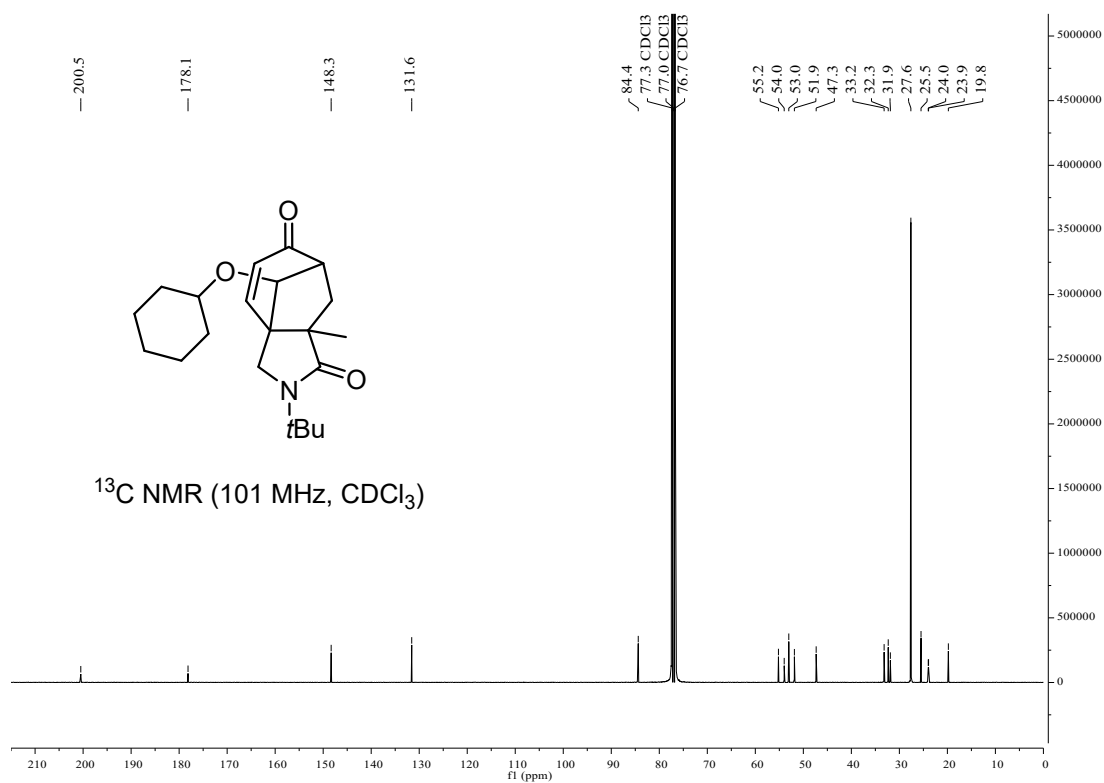



# Compound 5

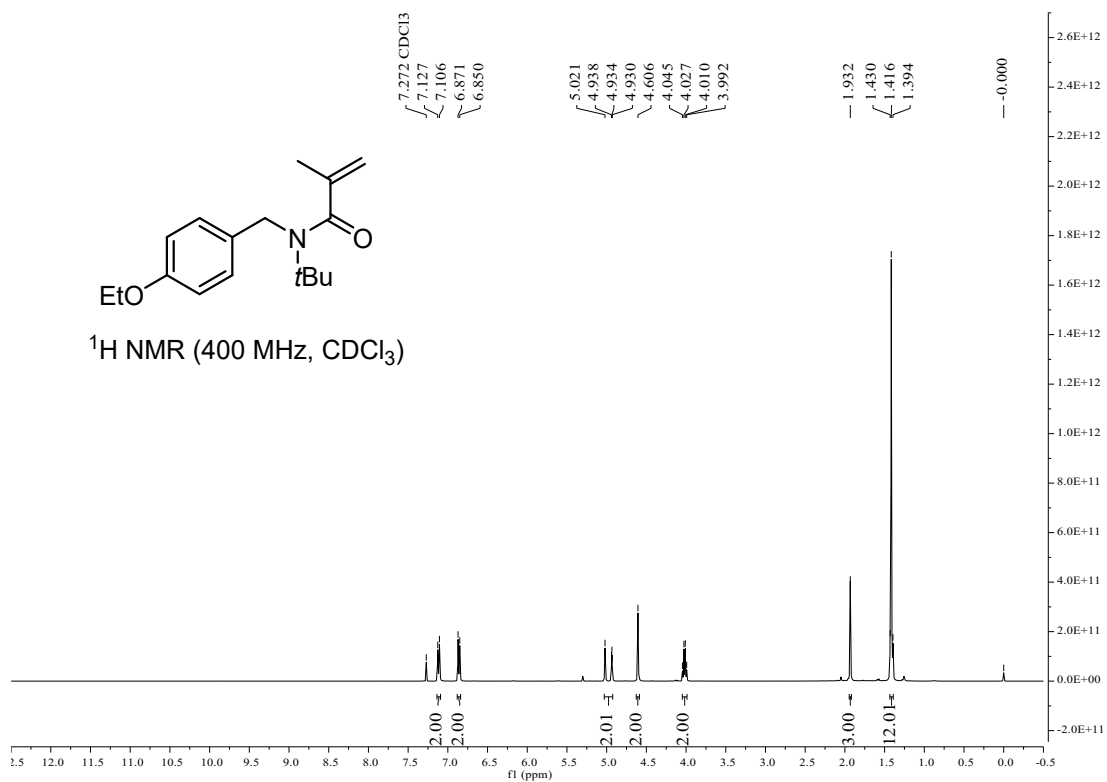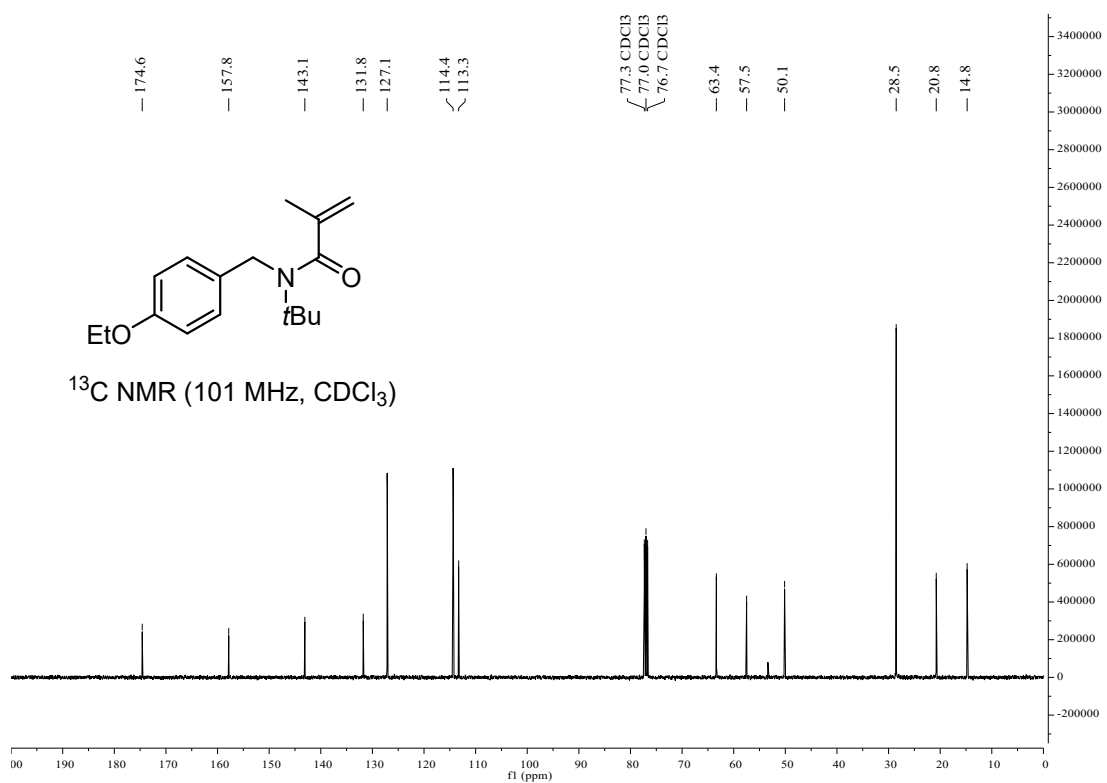

# Compound 7

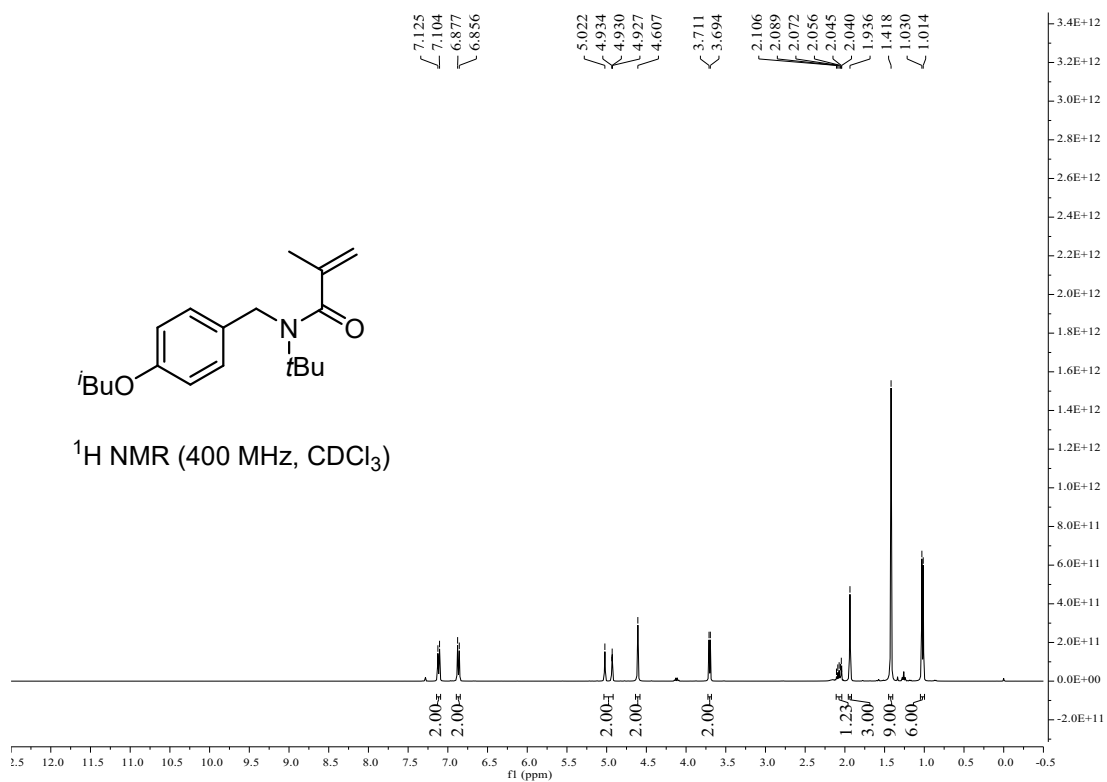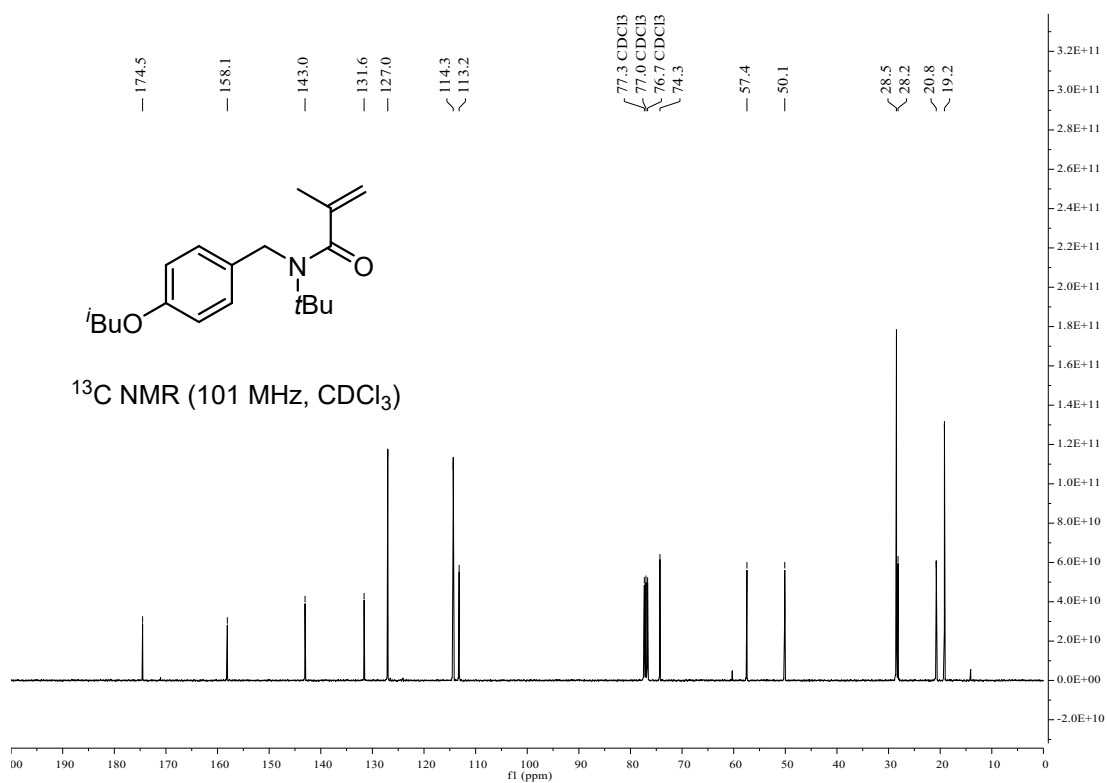

# Compound 8

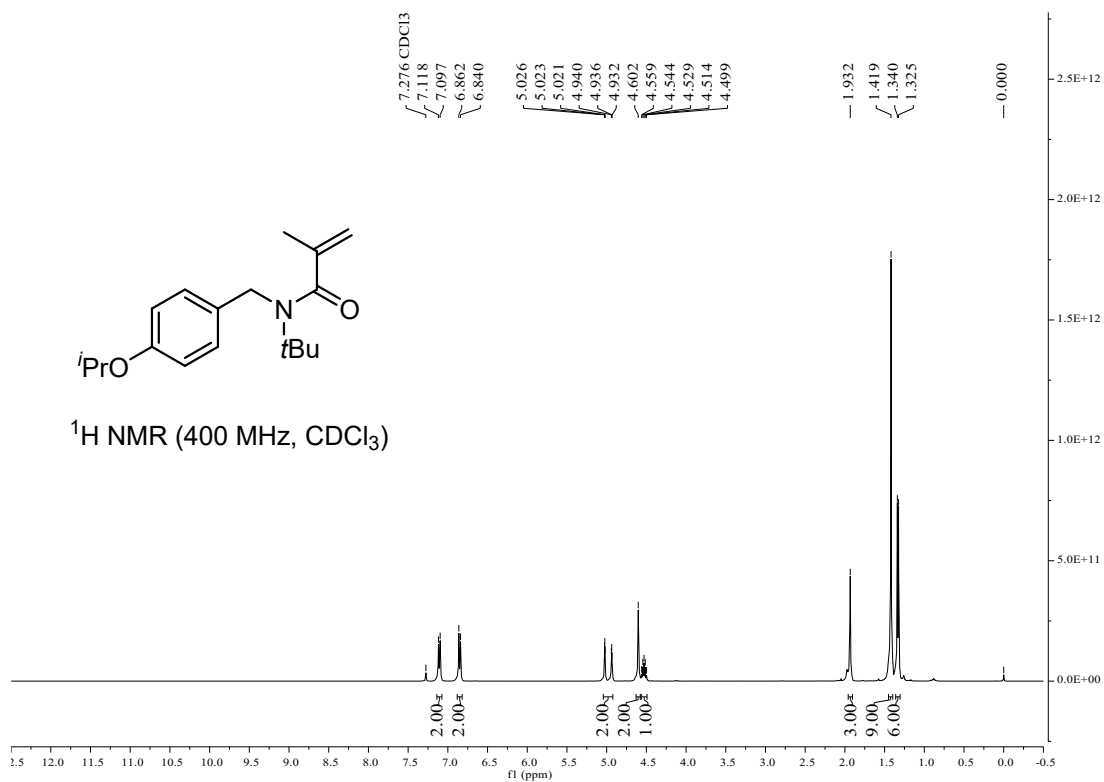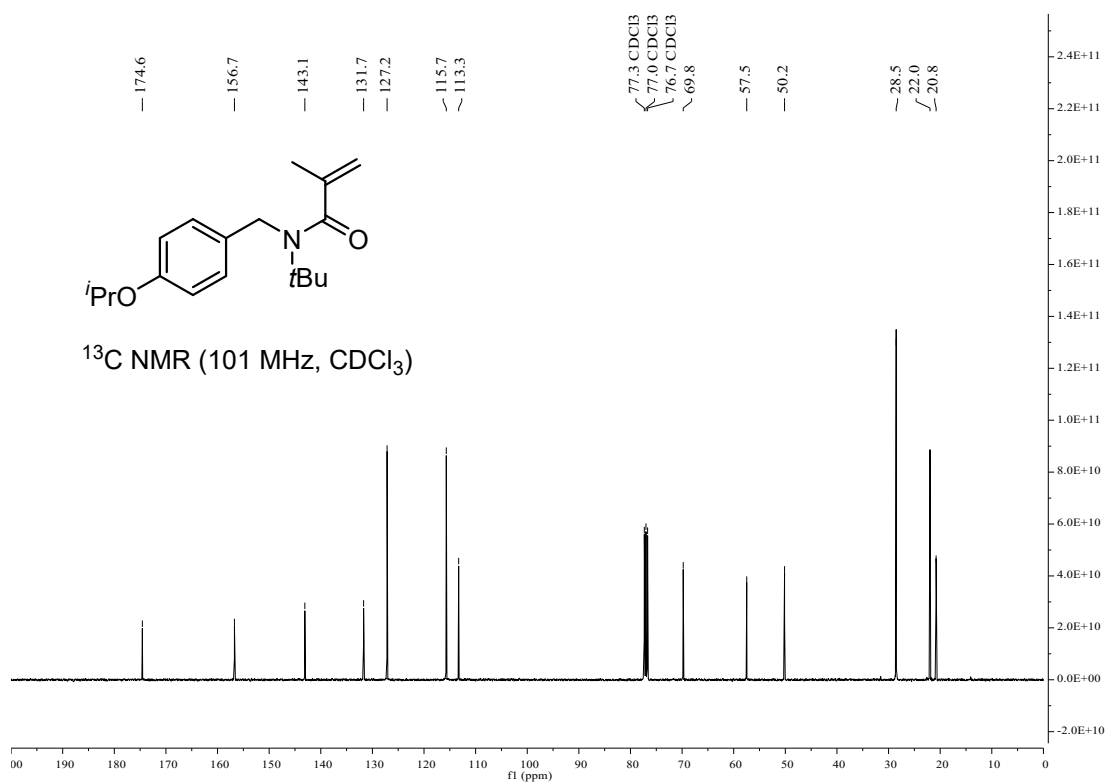

# Compound 9

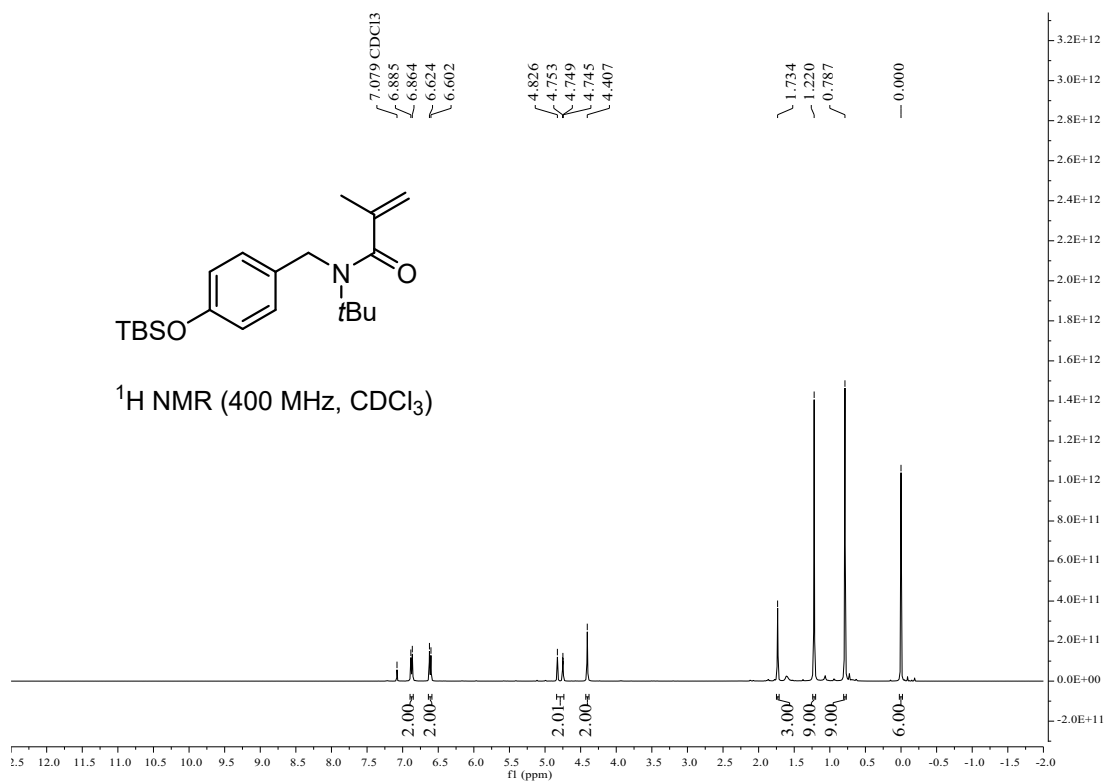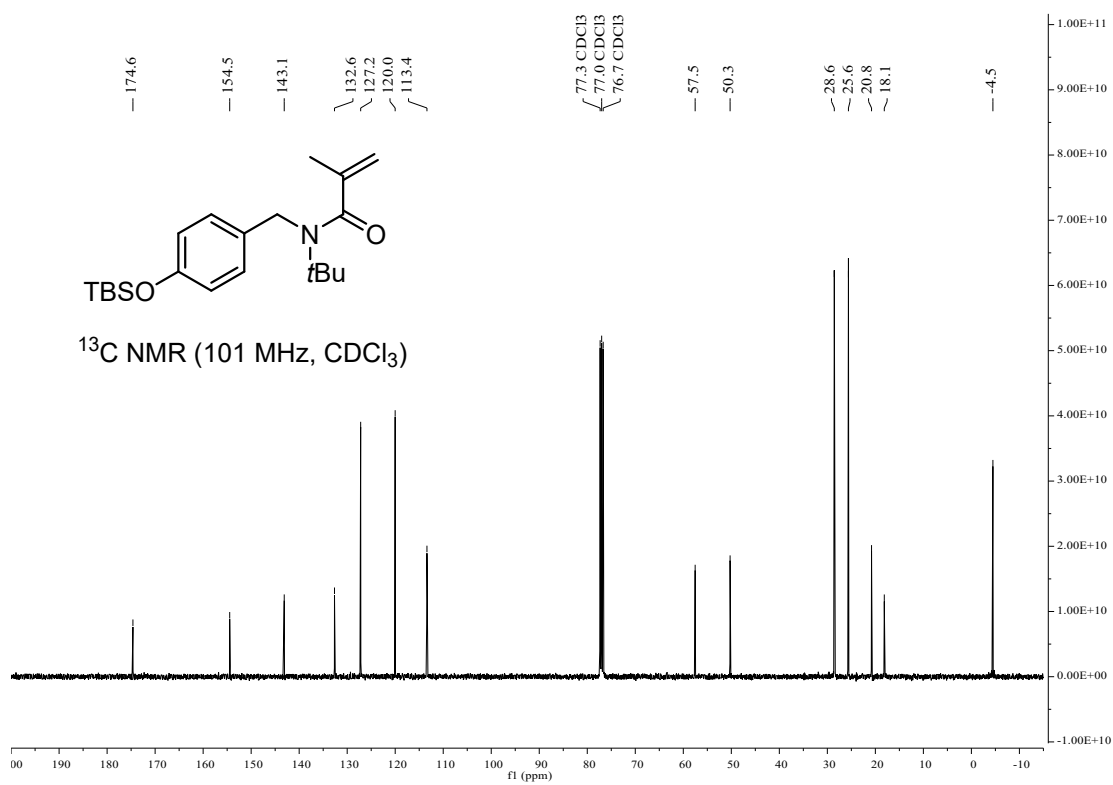

# Compound 10

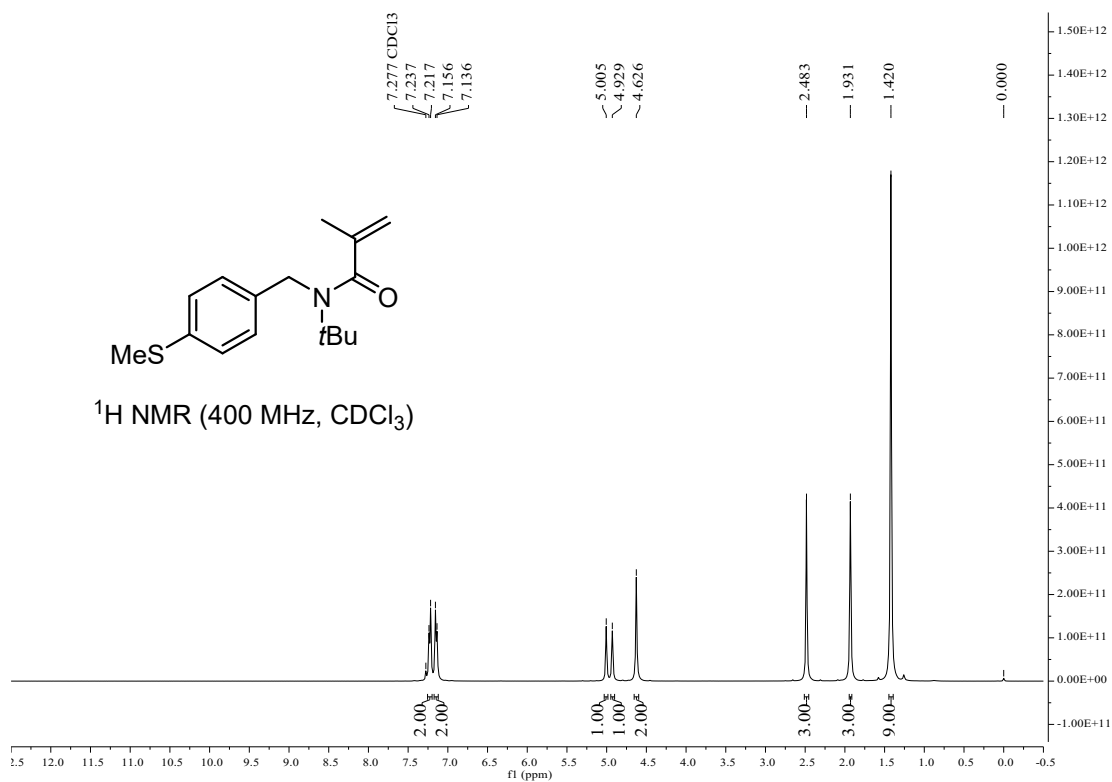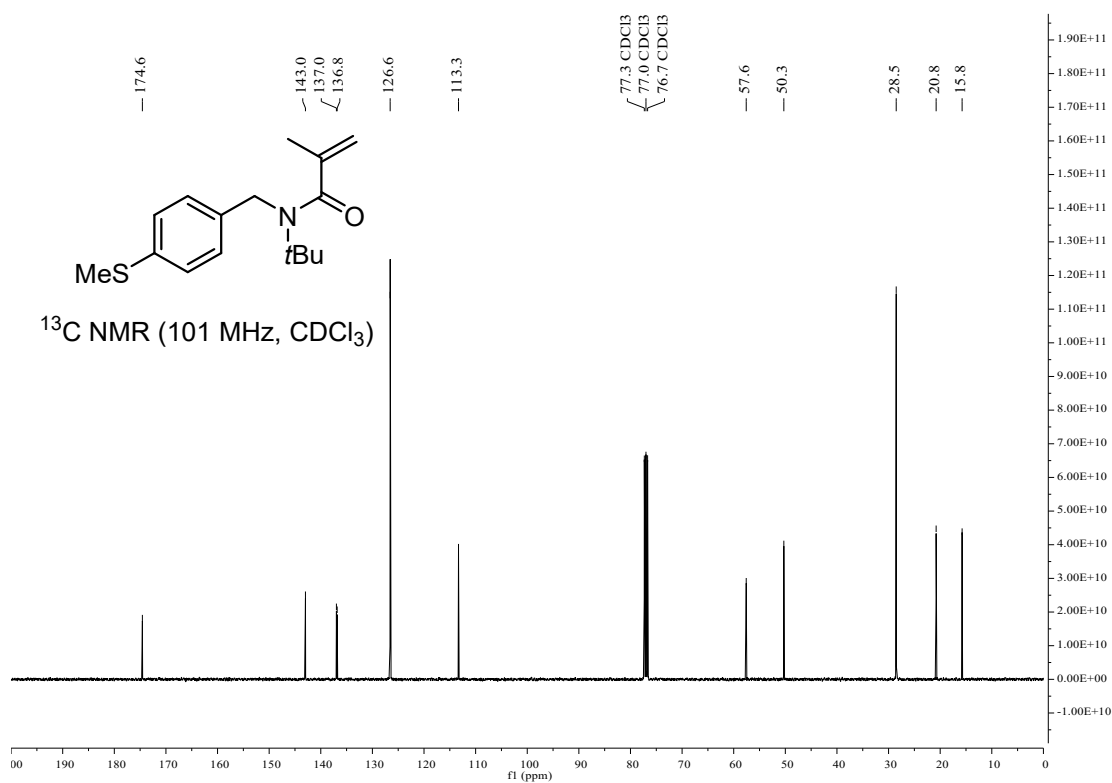

# Compound 14

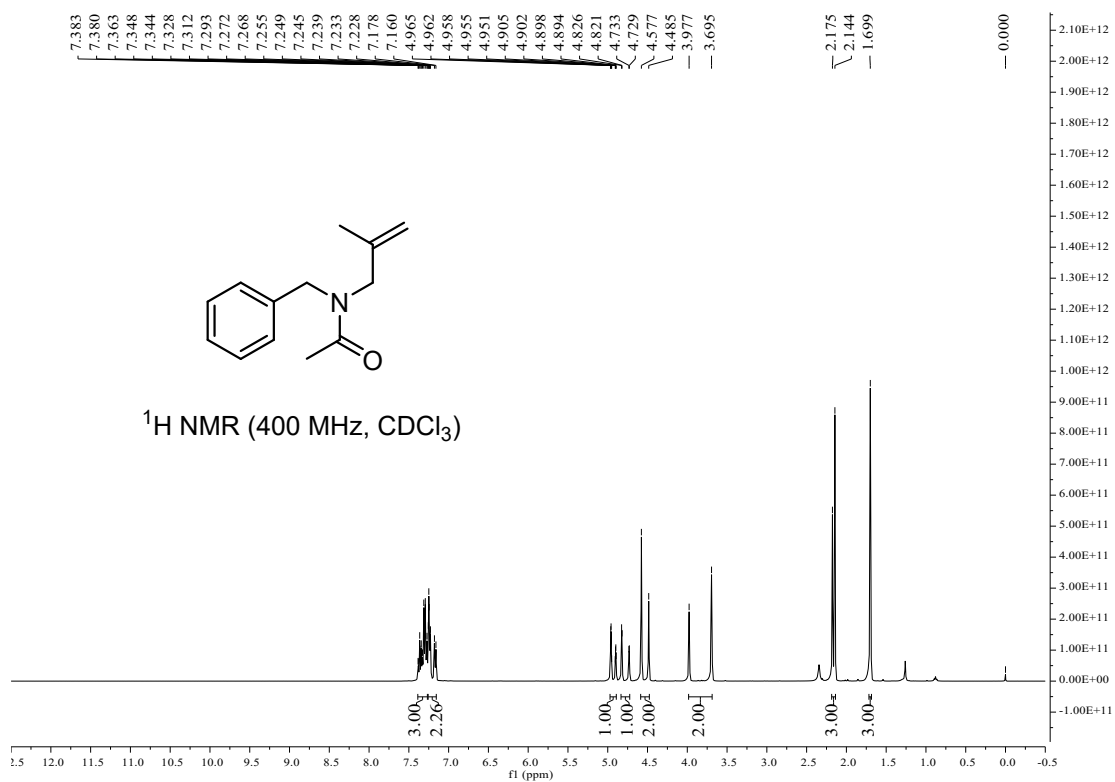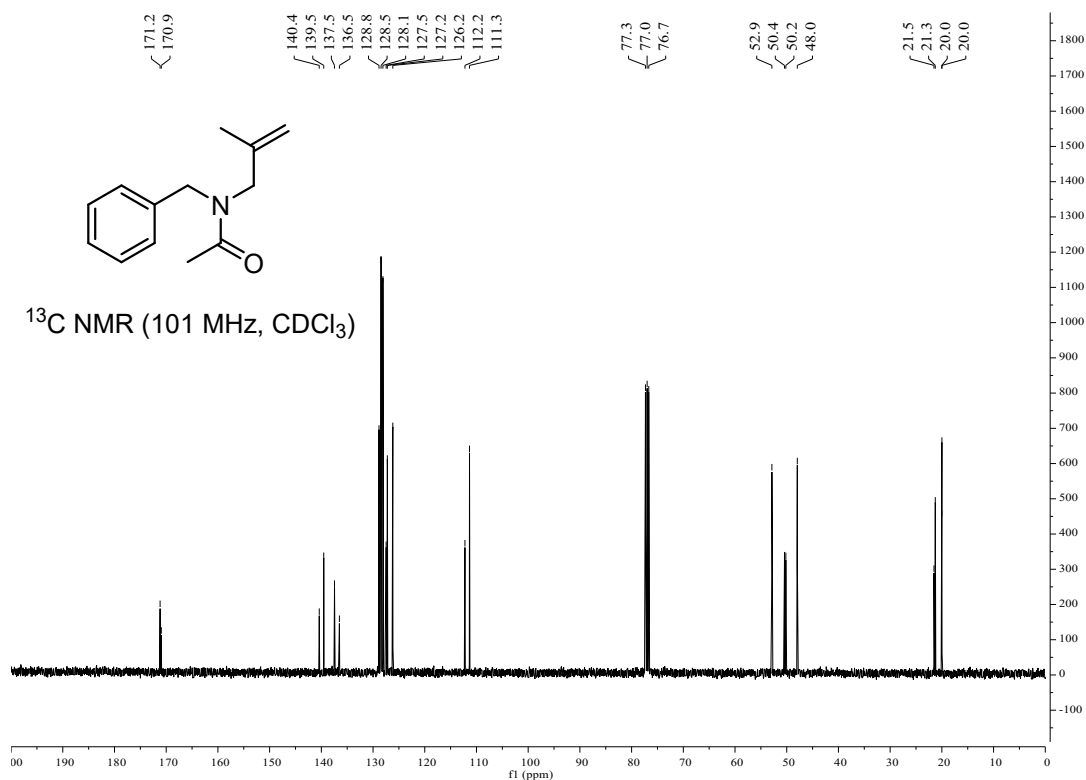

# Compound S1

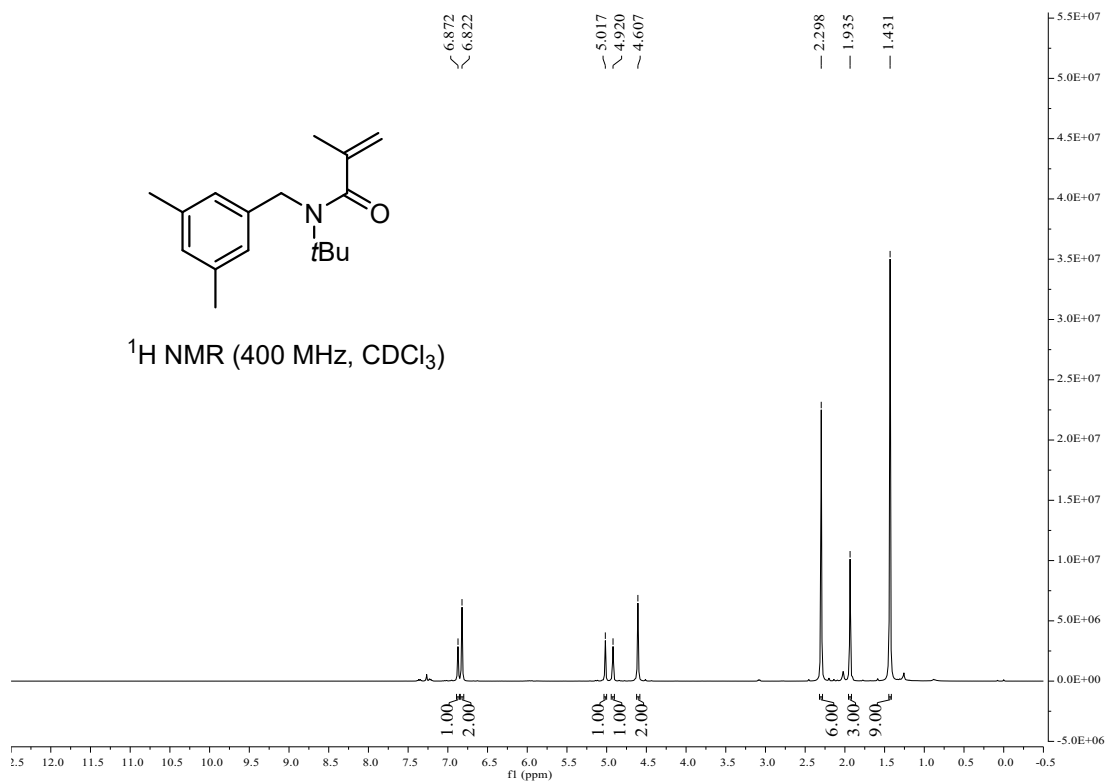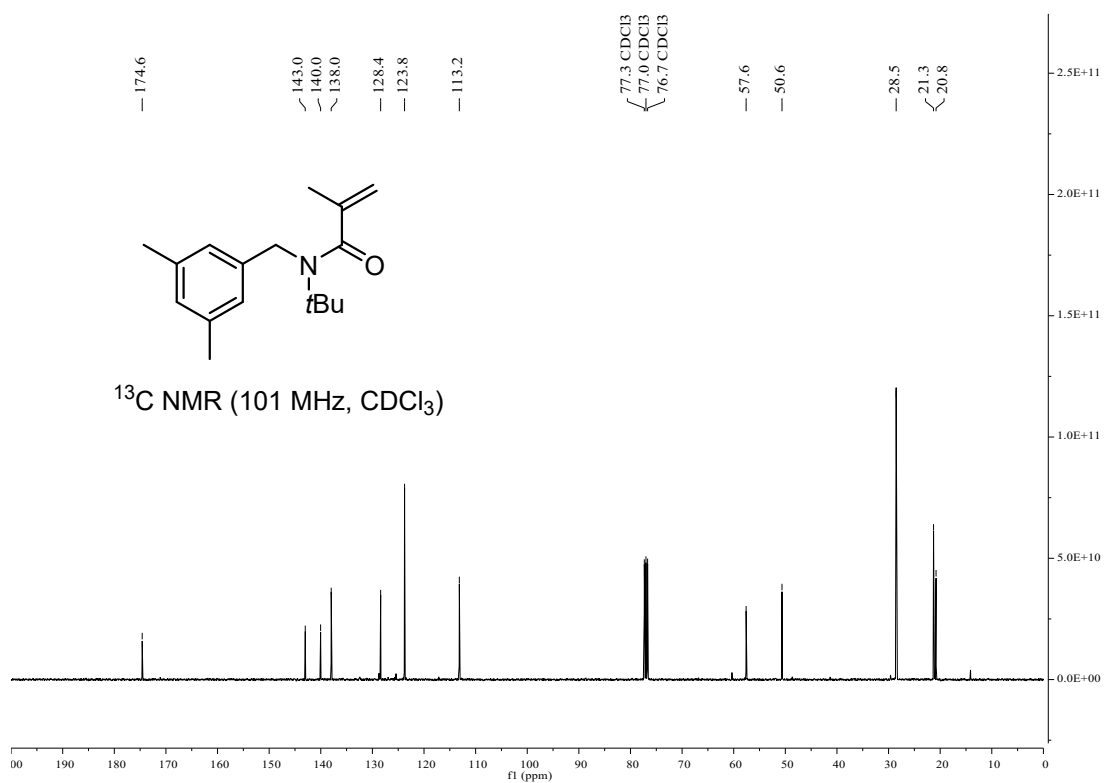

# Compound S2

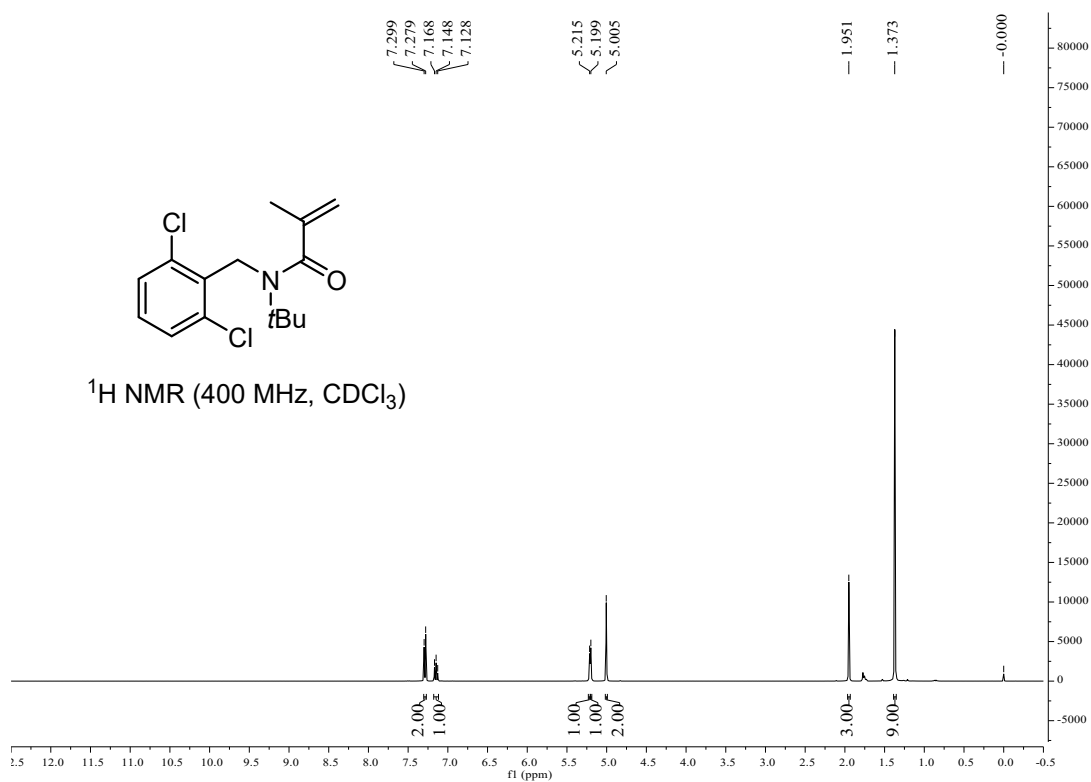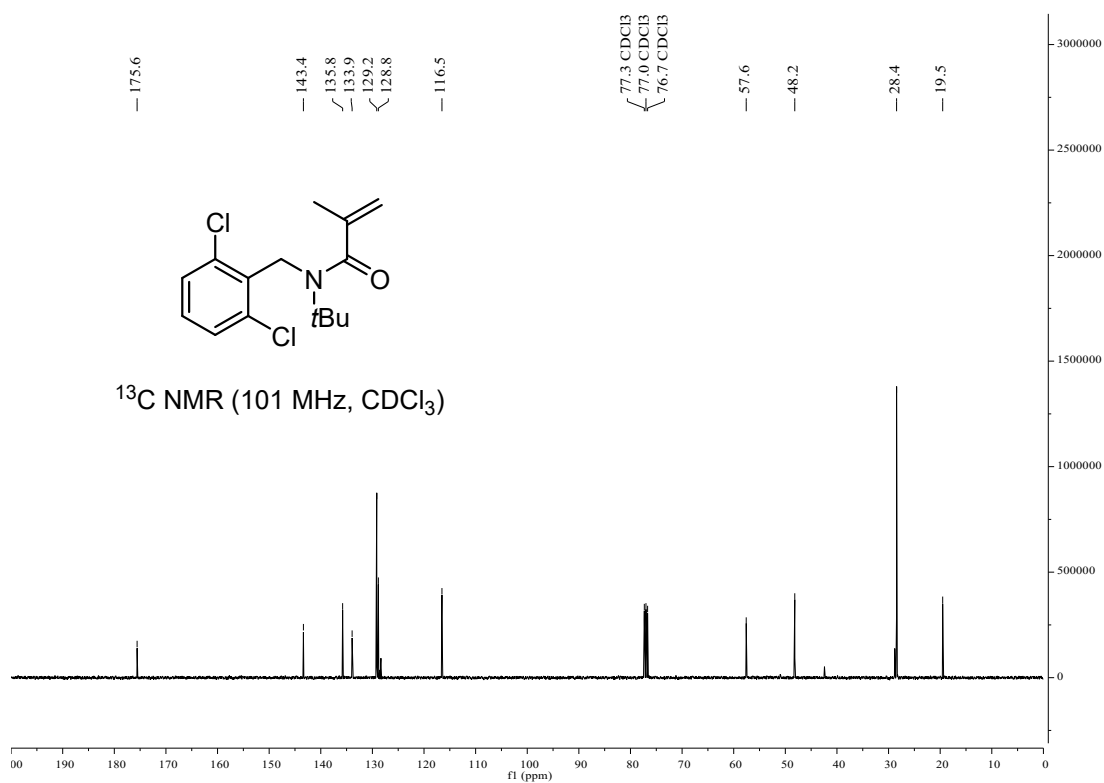



# Compound S3

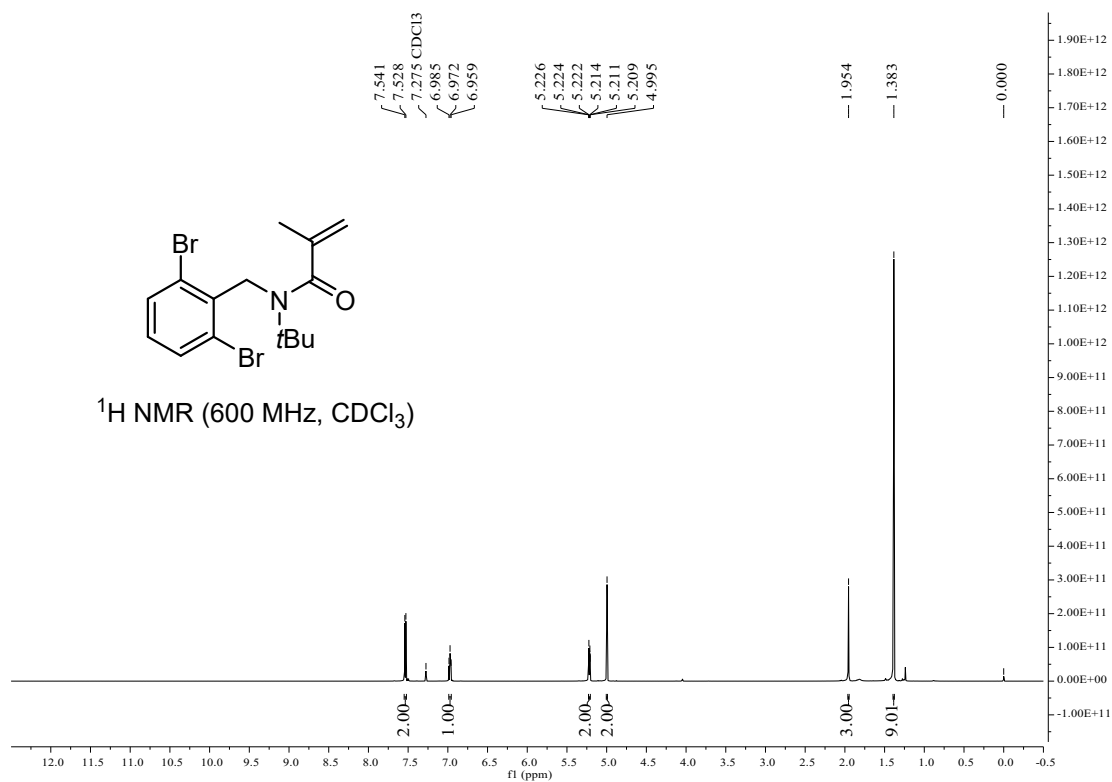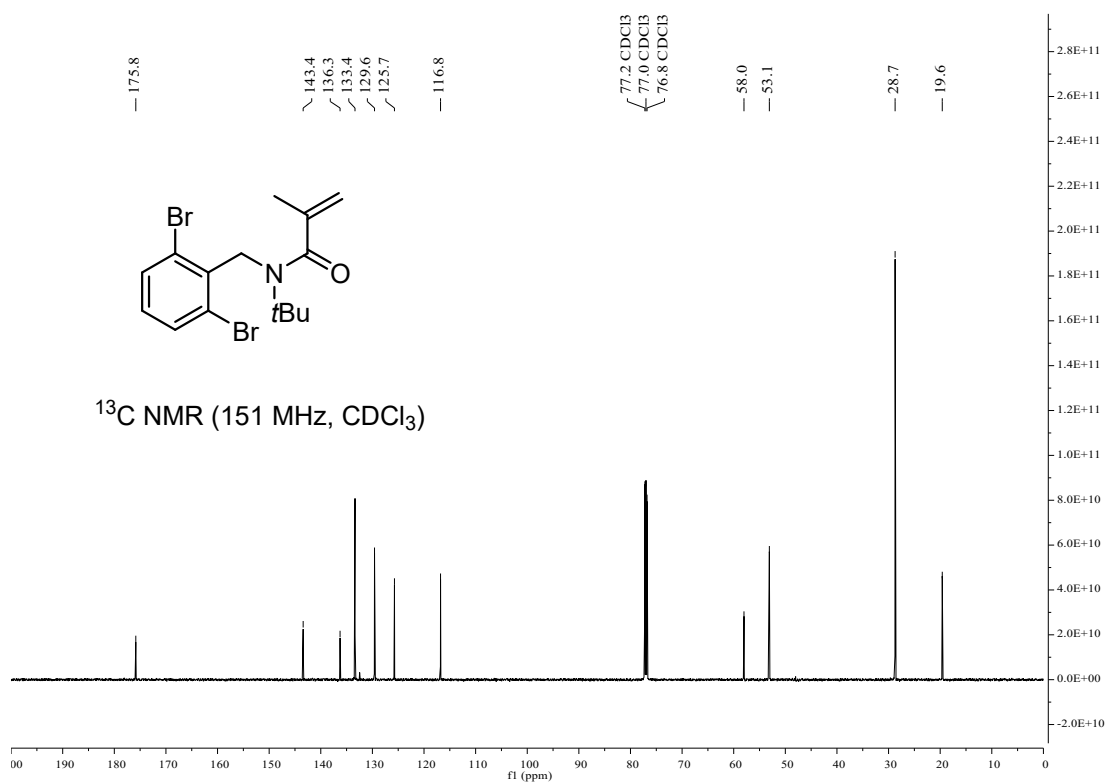

# Compound S4

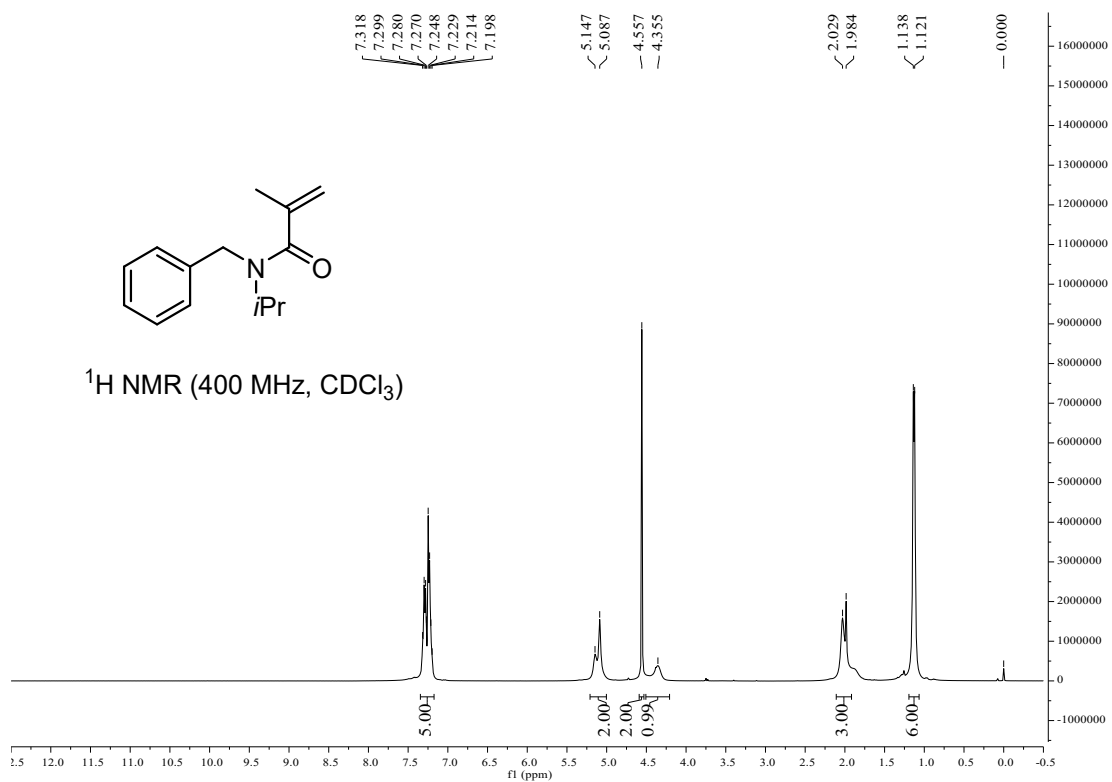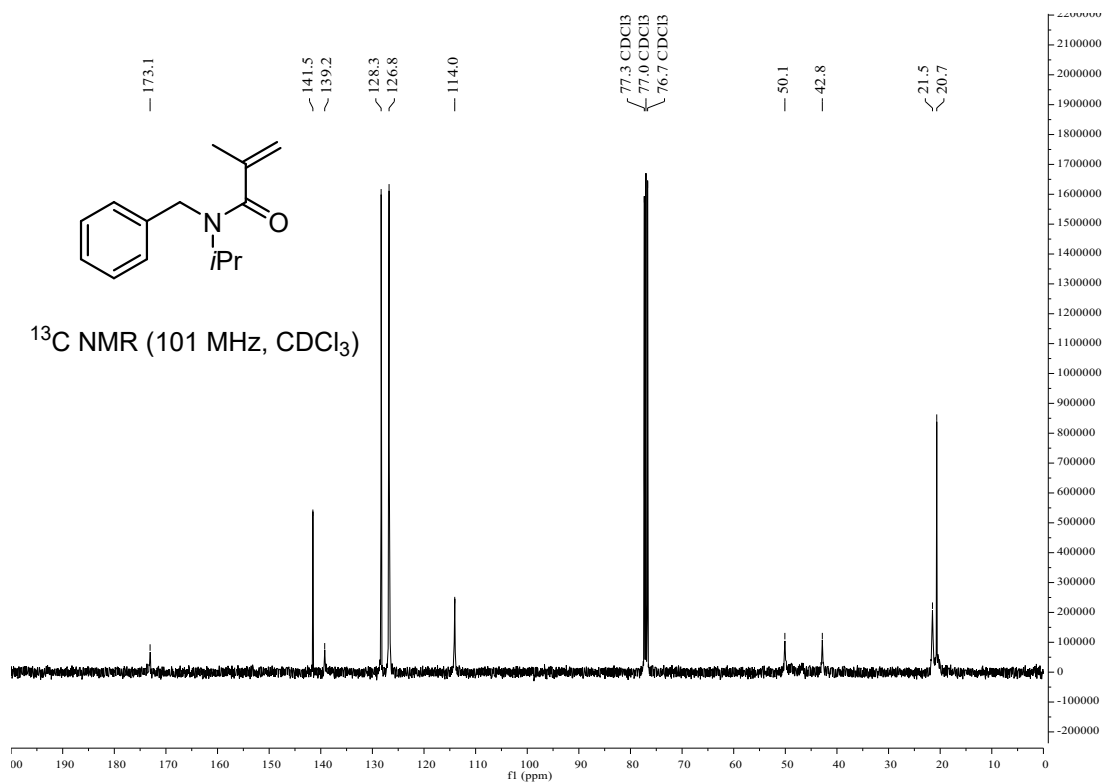

# Compound S5

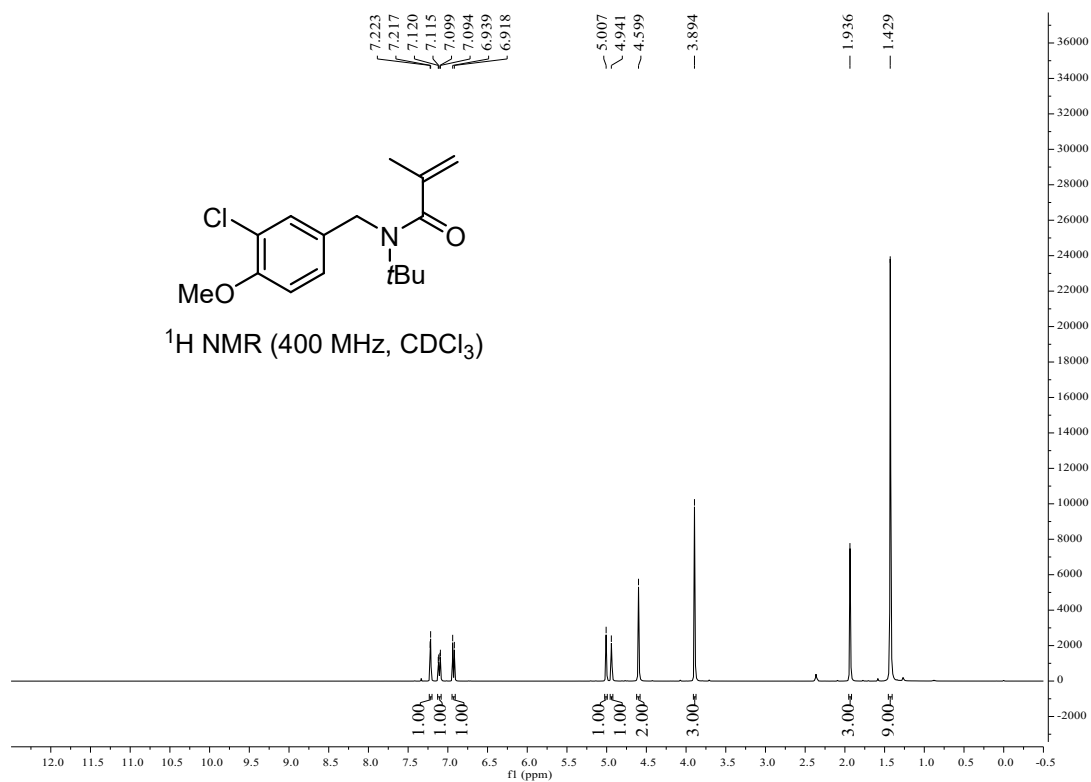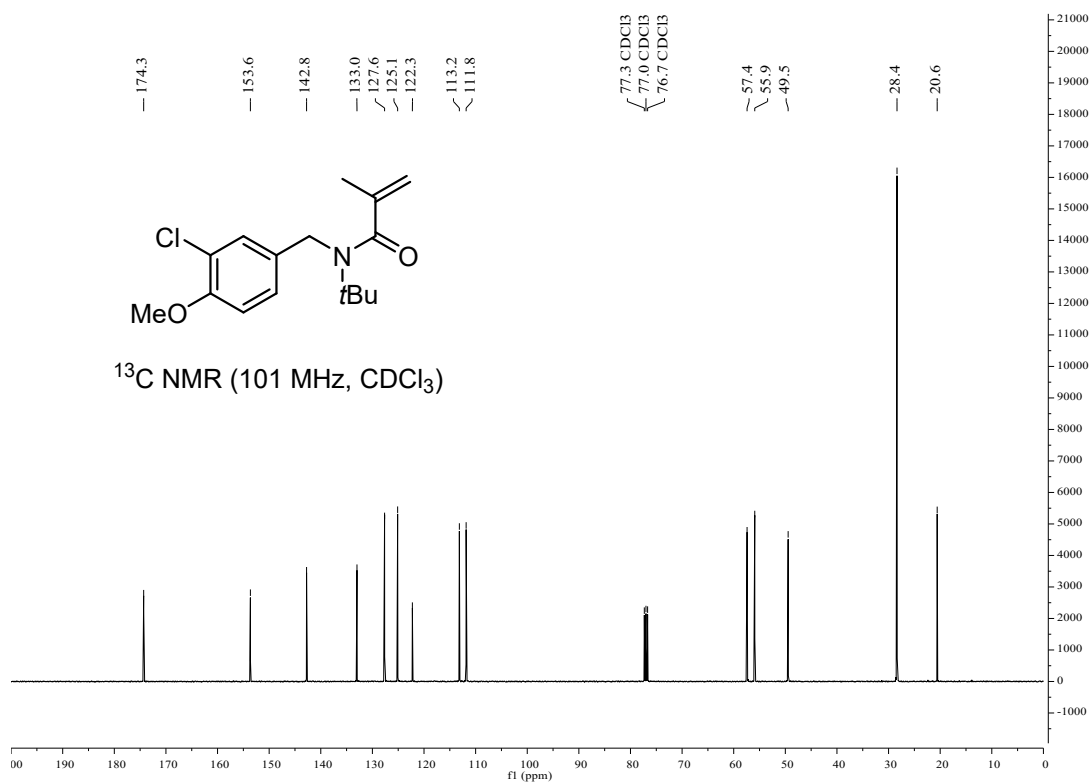

# Compound S6

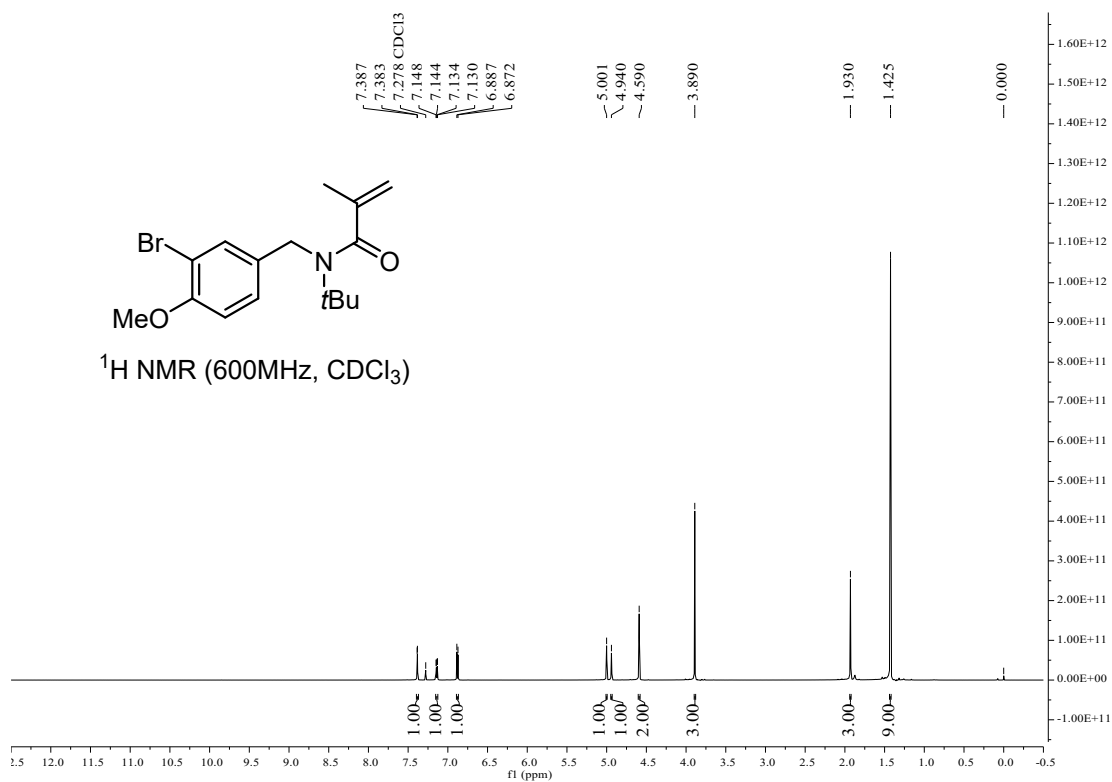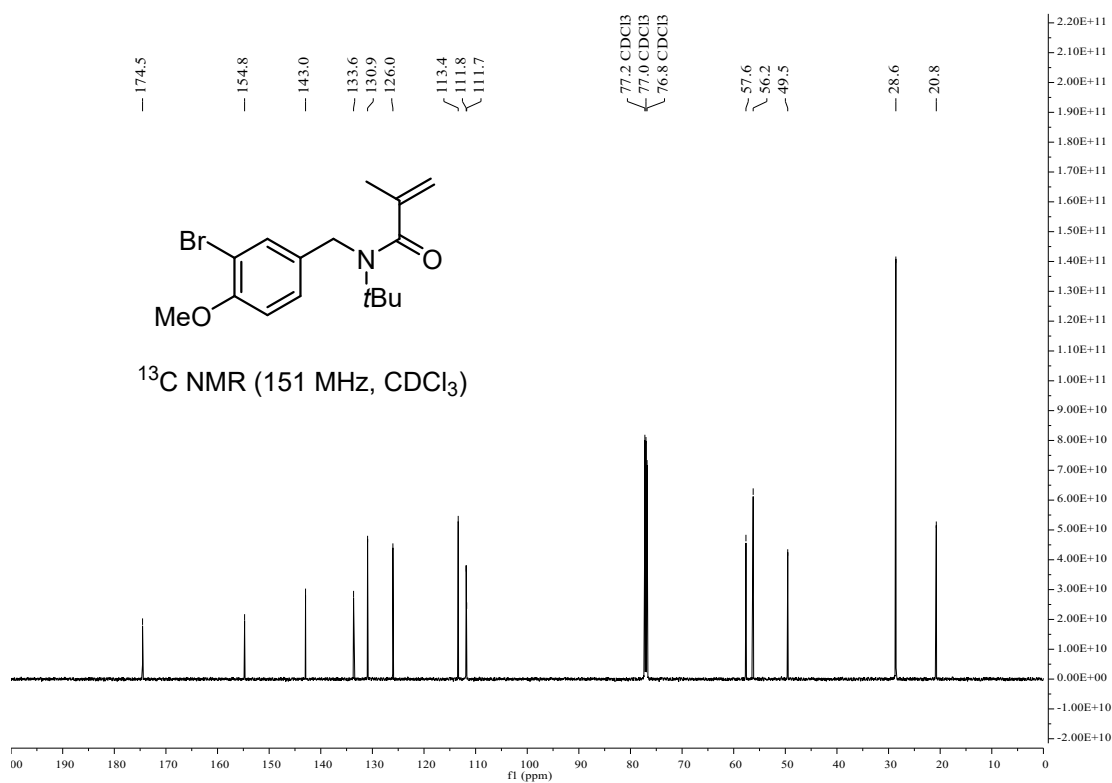

# Compound S7

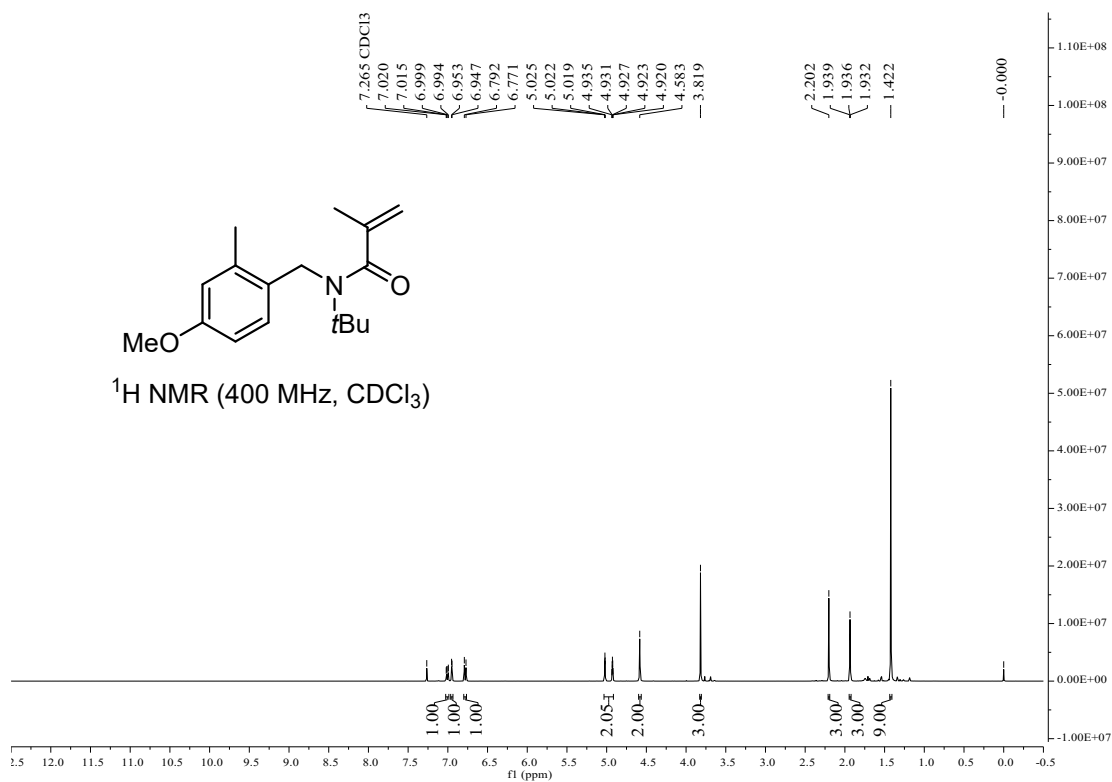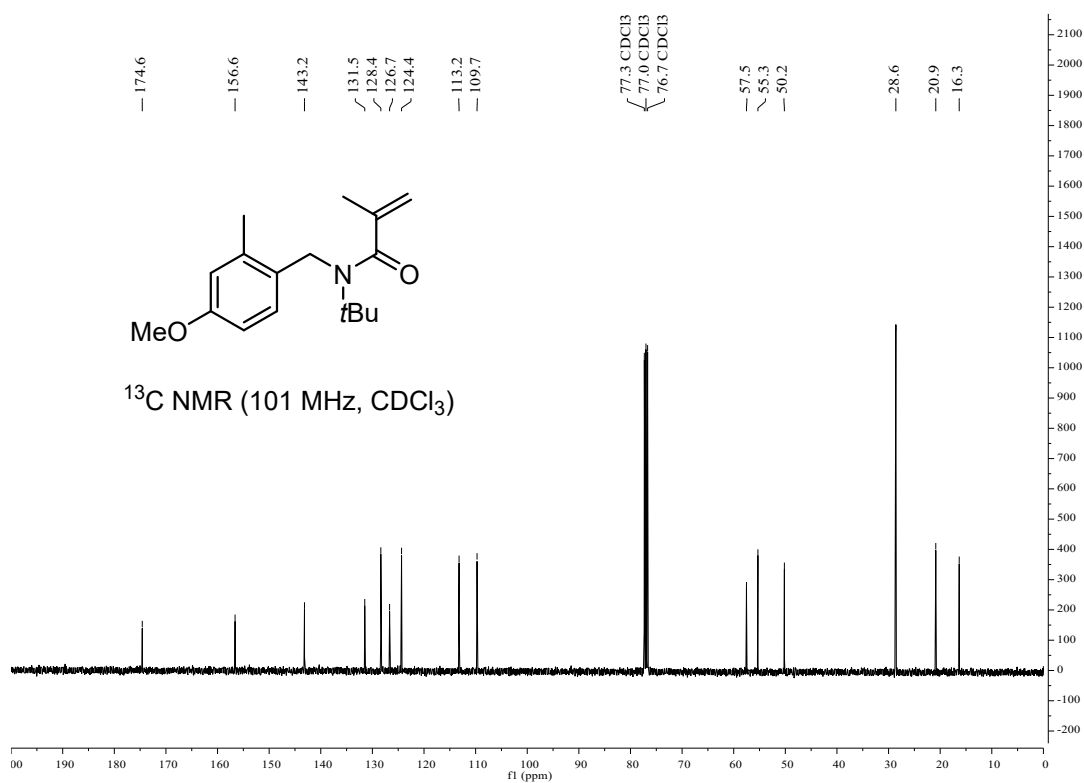

# Compound S8

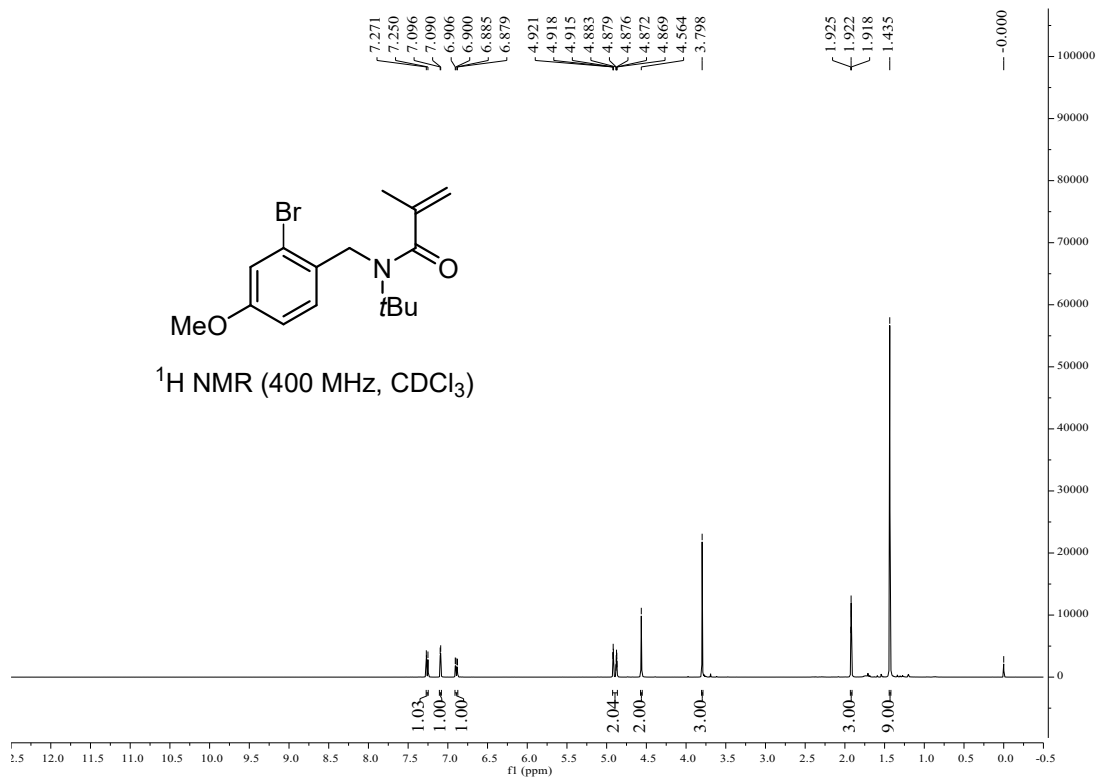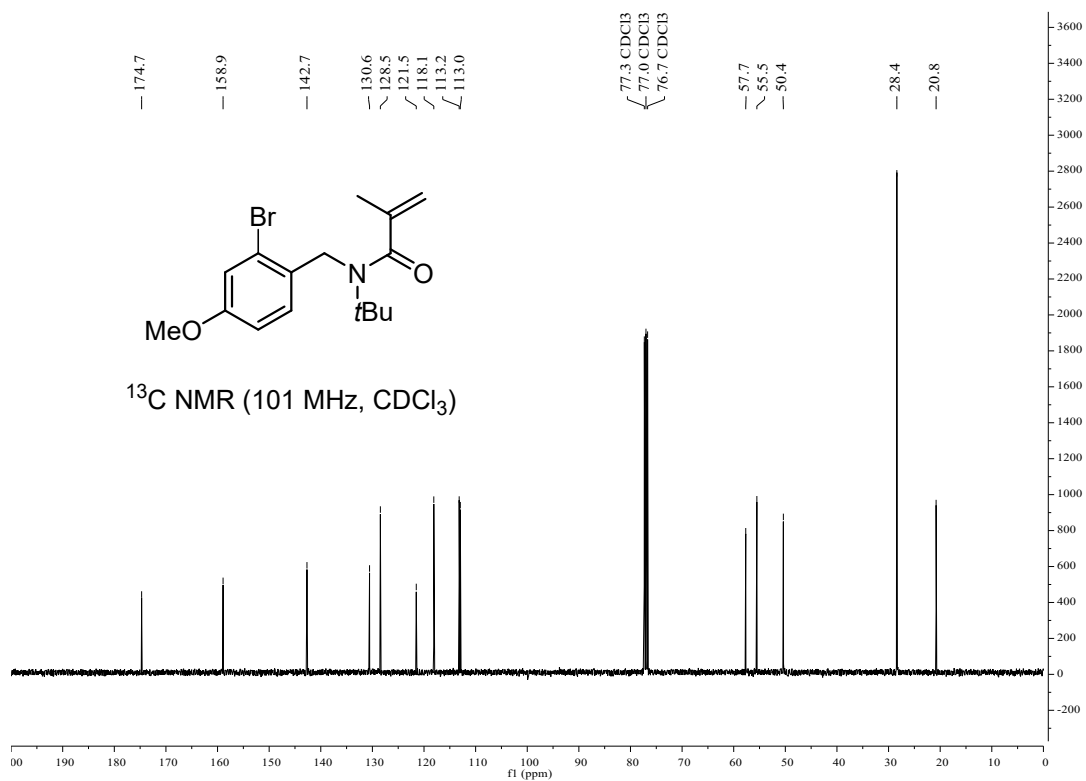

# Compound S9

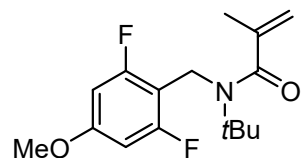

<sup>1</sup>H NMR (400 MHz, CDCl<sub>3</sub>)

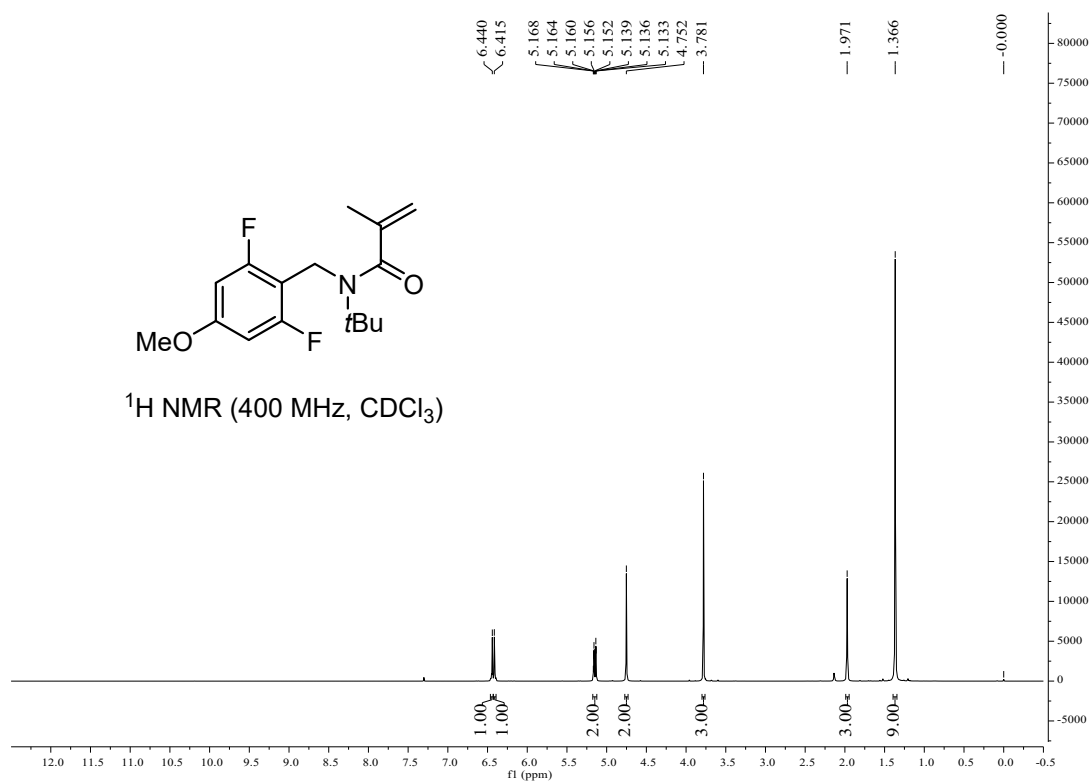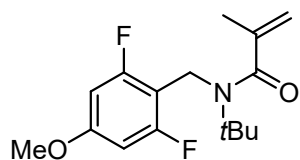

<sup>13</sup>C NMR (101 MHz, CDCl<sub>3</sub>)

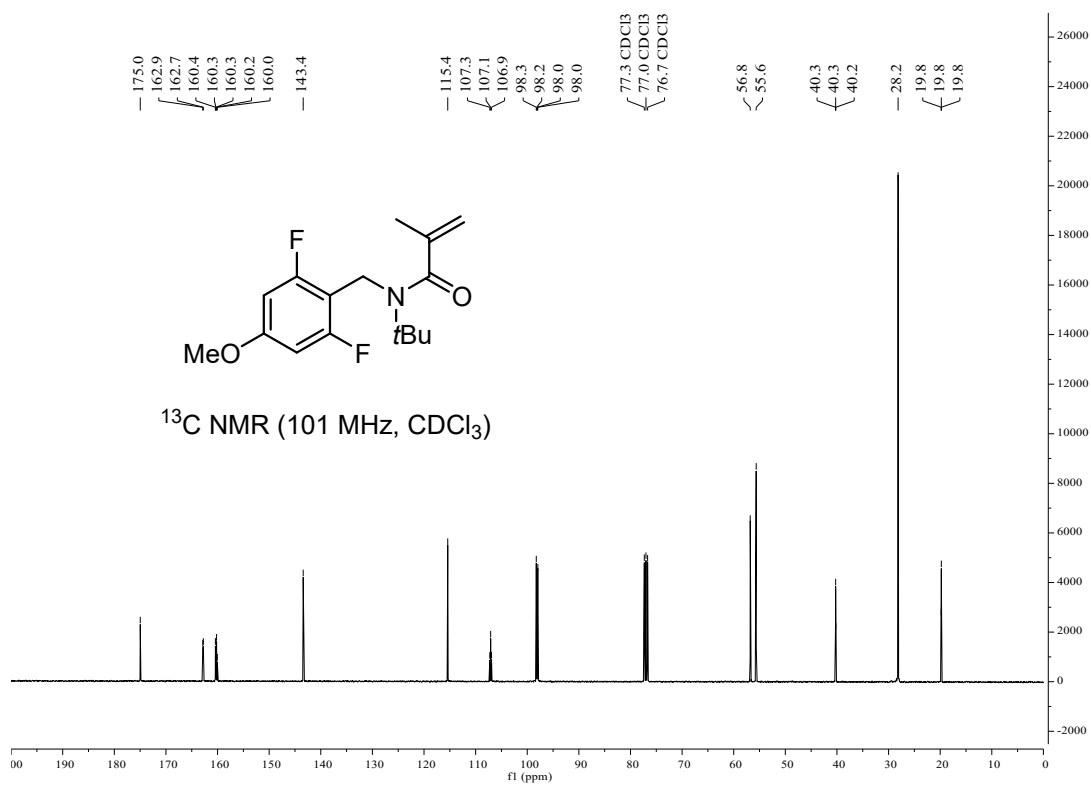

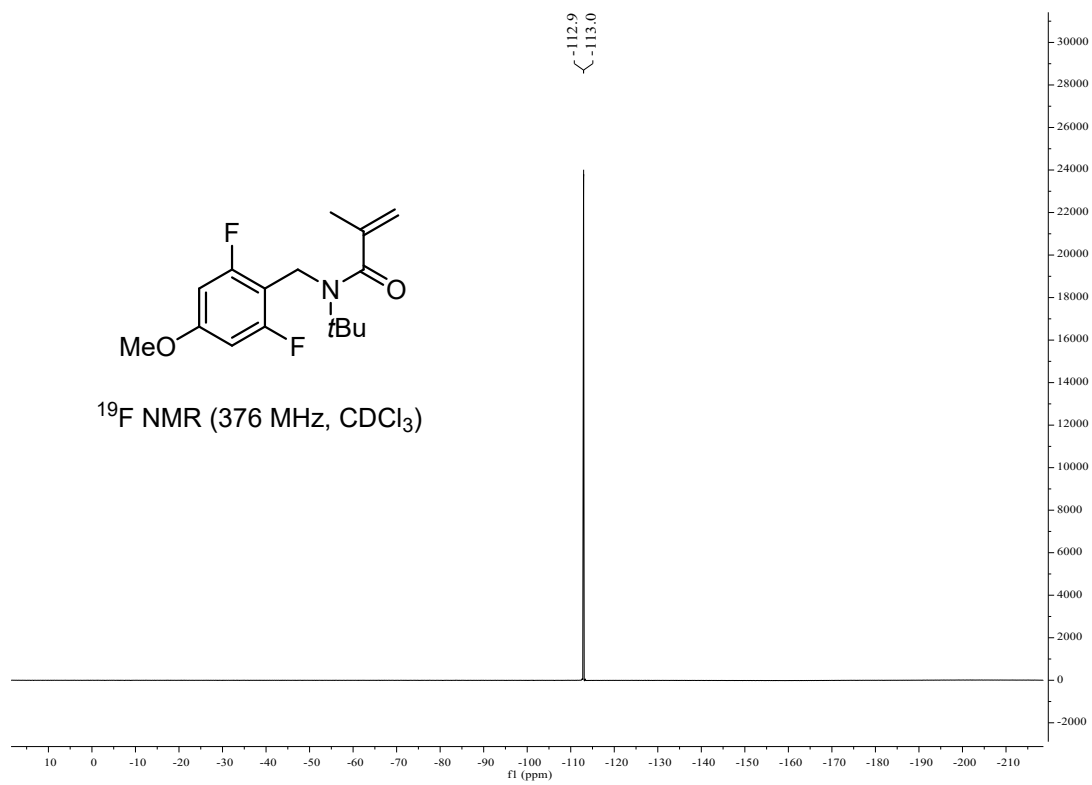



# Compound S10

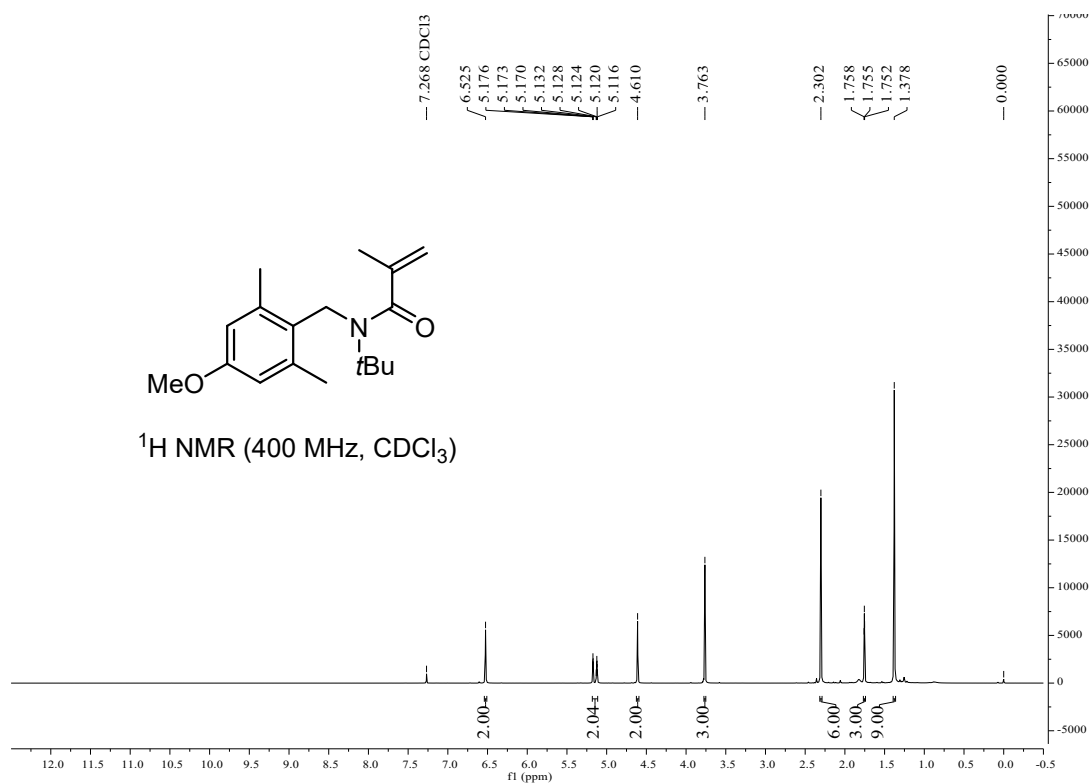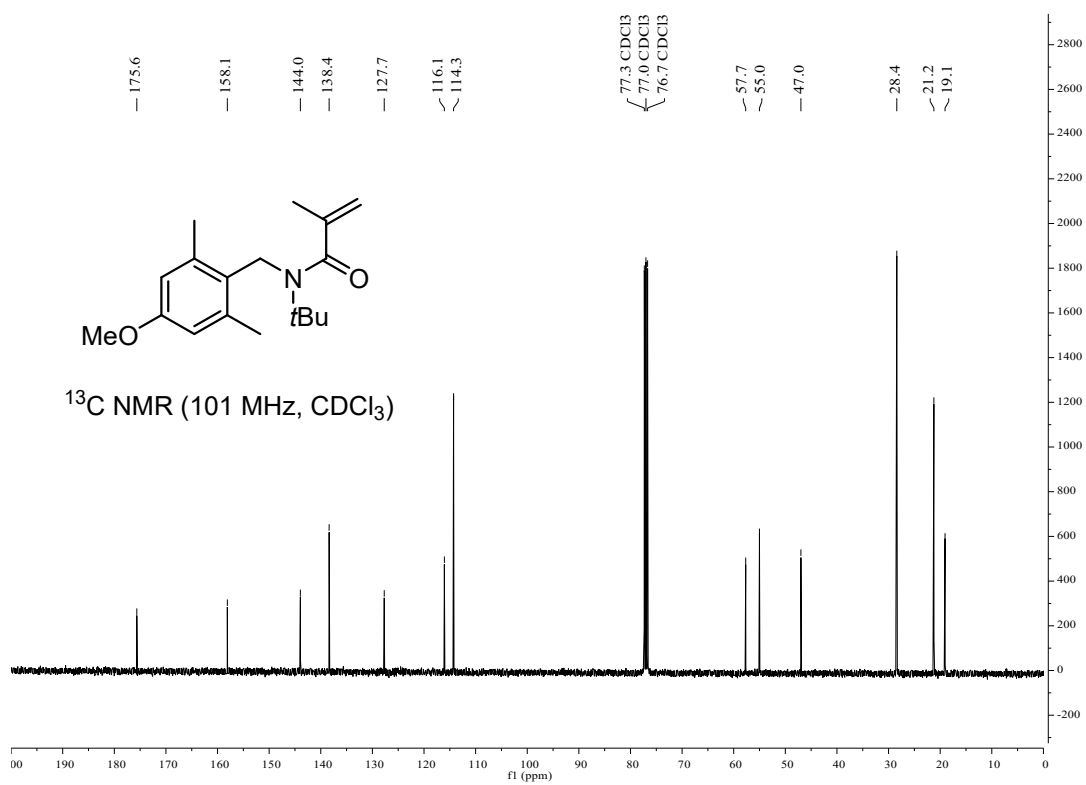

# Compound S11

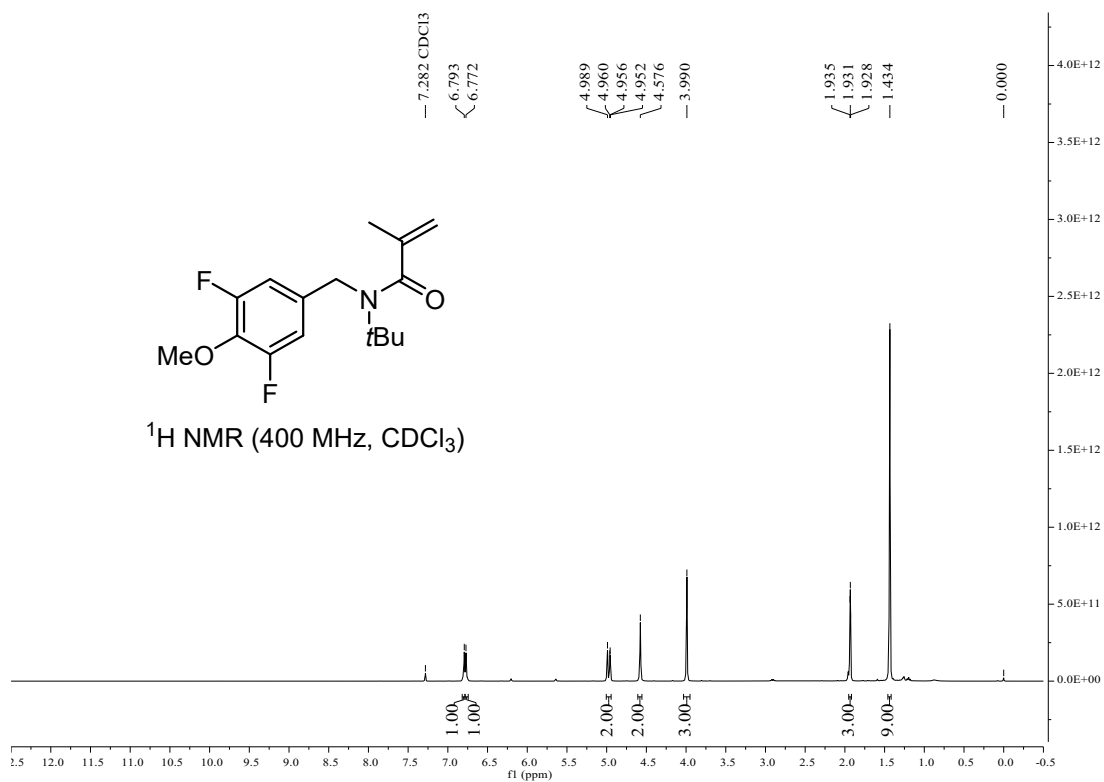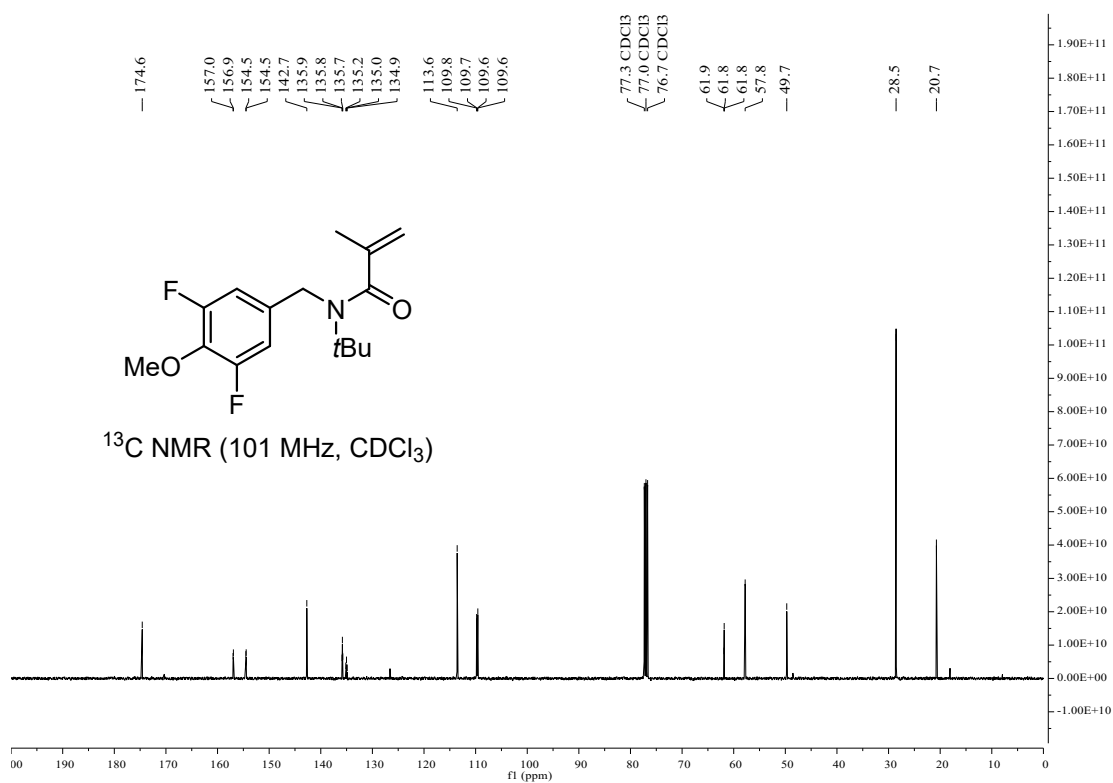

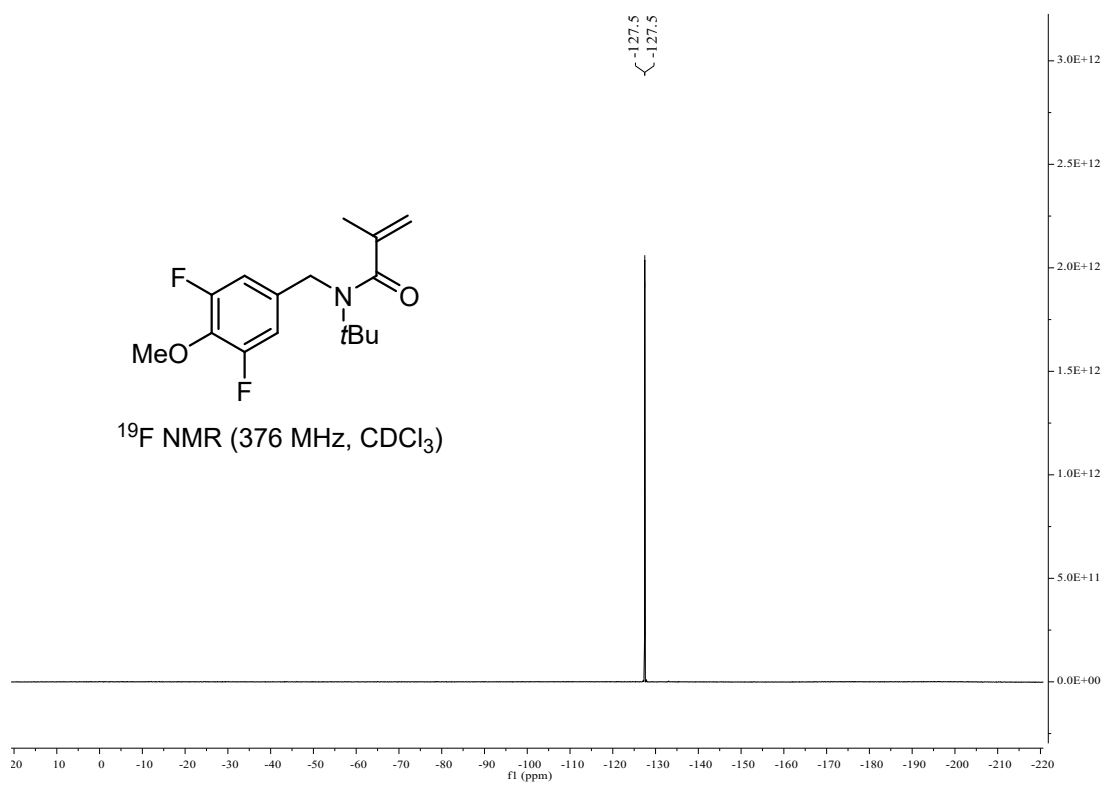

# Compound S12

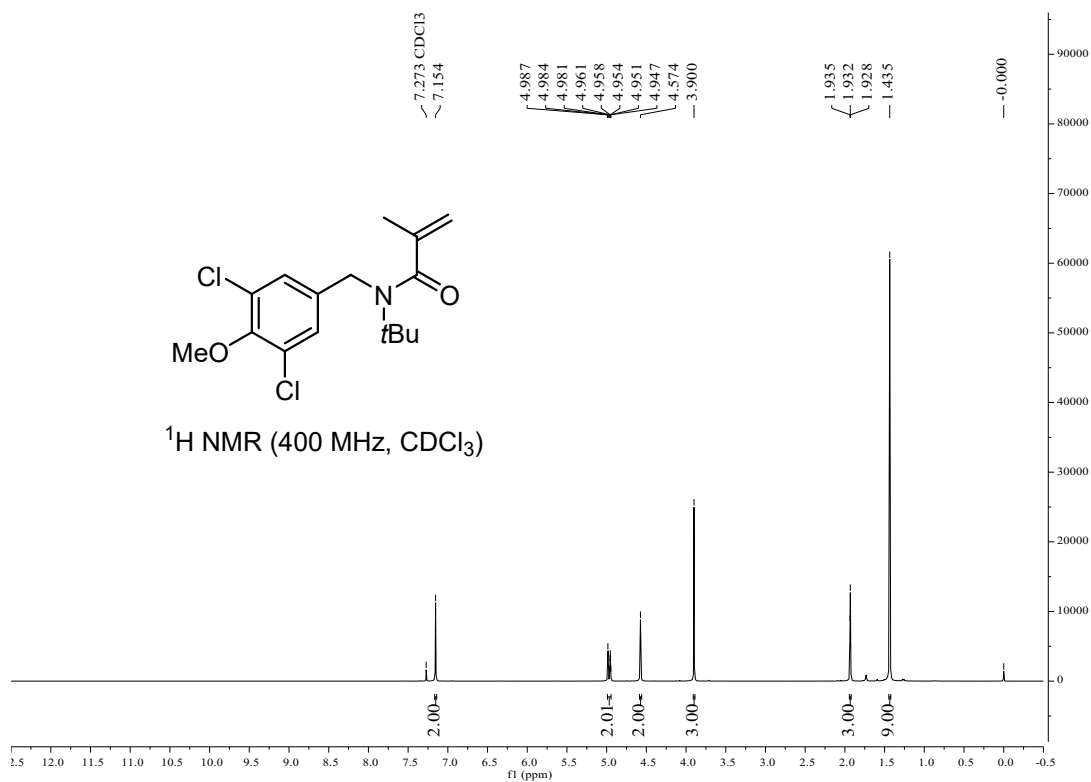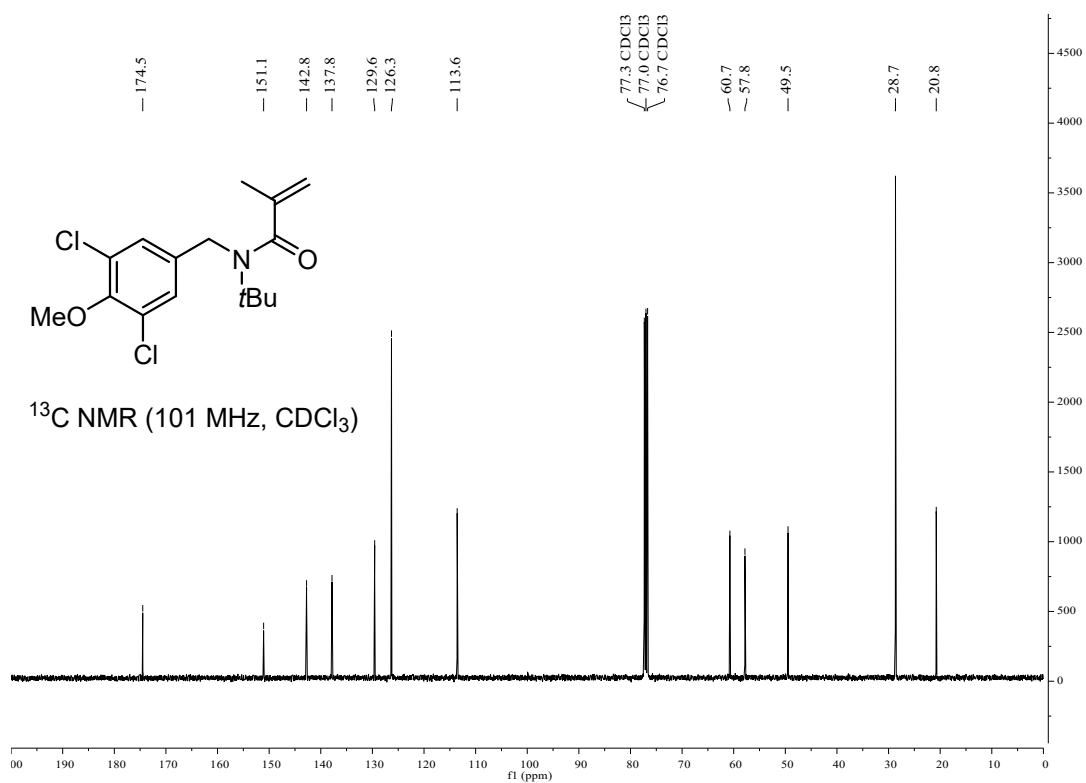

# Compound S13

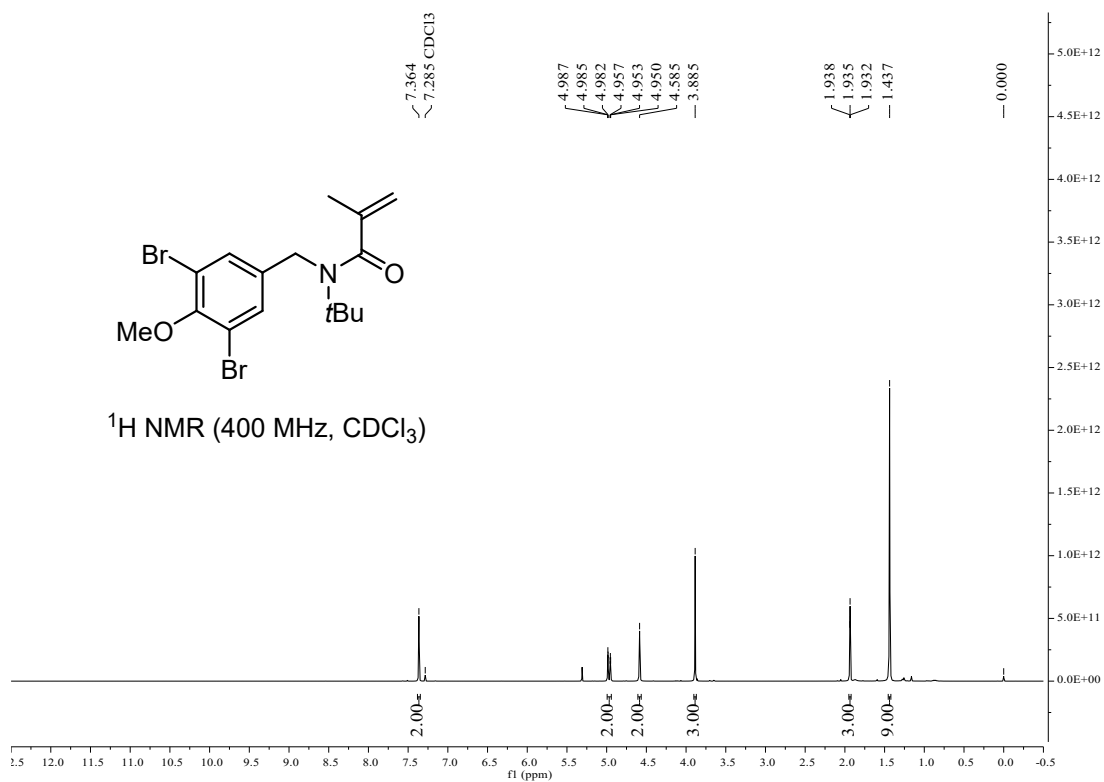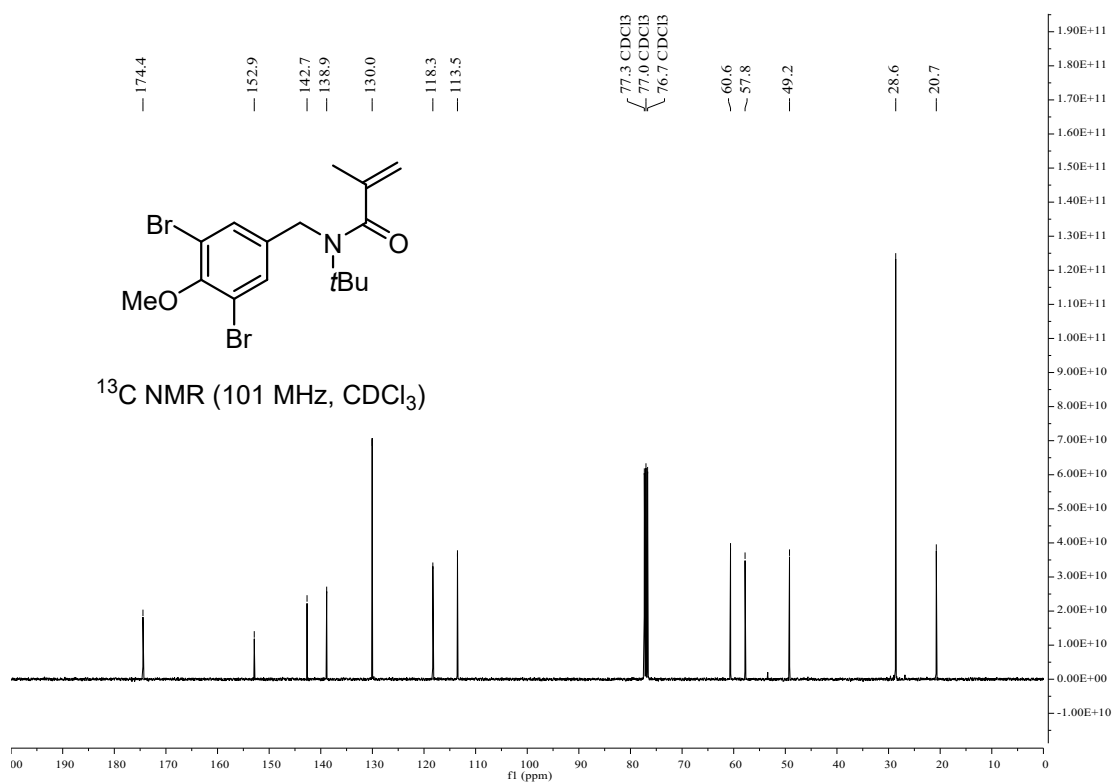

# Compound S14

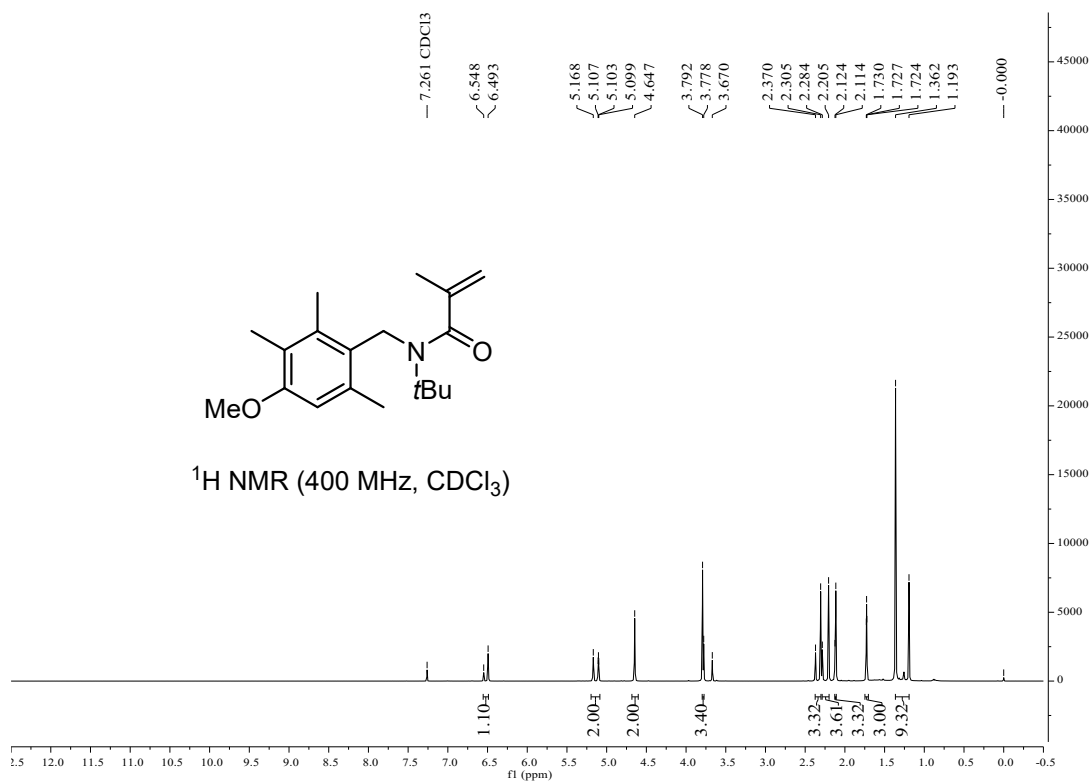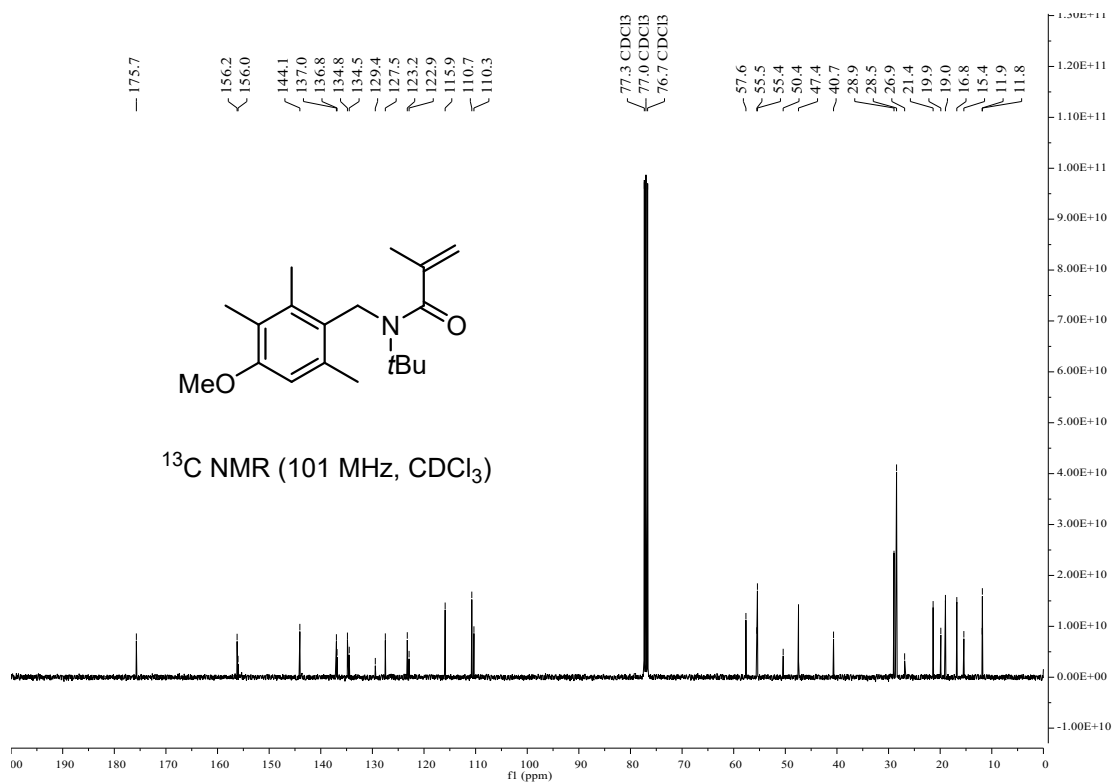

Supplement: d3gc00728f1.pdf [file d3gc00728f1.pdf]
